# Supplementary material
Source: PubMed Central journal article supplement (PMC5424440)
Supplement: co7b00033_si_008.pdf [file co7b00033_si_008.pdf]

# Supporting Information

## Ammonia-Promoted One-Pot Tetrazolopiperidinone Synthesis by Ugi Reaction

Pravin Patil,<sup>1</sup> Katarzyna Kurpiewska,<sup>2</sup> Justyna Kalinowska-Tłuścik,<sup>2</sup> Alexander Dömling<sup>1\*</sup>

<sup>1</sup> University of Groningen, Department of Drug Design, A. Deusinglaan 1, 9713 AV Groningen, The Netherlands. Fax: (+31)503637582.

E-mail: a.s.s.domling@rug.nl, [www.drugdesign.nl](http://www.drugdesign.nl).

<sup>2</sup> Jagiellonian University, Faculty of Chemistry, Department of Crystal Chemistry and Crystal Physics, Biocrystallography Group, Ingardena 3, 30-060 Kraków, Poland.

### Table of Contents

|                                                                                  |         |
|----------------------------------------------------------------------------------|---------|
| General Methods.....                                                             | S2      |
| Preparations of Compounds C.....                                                 | S2      |
| <sup>1</sup> H NMR, <sup>13</sup> C NMR and SFC-MS data for Compounds .....      | S3-S13  |
| <sup>1</sup> H NMR, <sup>13</sup> C NMR and SFC-MS Spectrums for Compounds ..... | S14-S89 |
| Crystal structure determination.....                                             | S90-S94 |
| References .....                                                                 | S95     |

## Experimental section

### 1. General methods

Nuclear magnetic resonance spectra (NMR) were recorded on a Bruker Avance 500 spectrometer ( $^1\text{H}$  NMR (500 MHz),  $^{13}\text{C}$  NMR (126 MHz)). Chemical shifts for  $^1\text{H}$  NMR were reported as  $\delta$  values and coupling constants were in hertz (Hz). The following abbreviations were used for spin multiplicity: s = singlet, d = doublet, t = triplet, dd = double doublet, m = multiplet, bs = broad singlet. Chemical shifts for  $^{13}\text{C}$  NMR reported in ppm relative to the solvent peak. Thin layer chromatography was performed on Fluka precoated silica gel plates (0.20 mm thick, particle size 25  $\mu\text{m}$ ). Flash chromatography was performed using SiliCycle silica gel type SiliaFlash P60 (230 – 400 mesh) as obtained from Screening Devices or with automated column chromatography using a Reveleris flash purification system purchased from Grace Davison Discovery Sciences. Reveleris pre-fabricated silica cartridges were purchased and used, for automated column chromatography, containing 40  $\mu\text{m}$  silica. Reagents were available from commercial suppliers and used without any purification unless otherwise noted. All isocyanides were made in house by performing the Ugi procedure. Other reagents were purchased from Sigma Aldrich, ABCR, Acros and AK Scientific and were used without further purification. Electrospray ionization mass spectra (ESI-MS) were recorded on a Waters Investigator Semi-prep 15 SFC-MS instrument.

### 2. General Procedure

#### Procedure A (One-pot Ugi Reaction followed by cyclization):

To a stirred solution of oxo compound (**A**, 1 equiv.) in methanol:H<sub>2</sub>O (3:1; 0.5M) was added ammonium chloride (1.2 equiv.) and stirred for 10 min., followed by addition of isocyanide (**B**, 1 equiv.) and sodium azide (1.2 equiv.). The reaction was allowed to stir at room temperature for 18 h. Then, the ammonium hydroxide (0.1 equiv.) was added to the reaction mixture and stirred at 50 °C for additional 18 h. The solvents were evaporated under vacuum and the crude mass obtained was purified by using flash column chromatography to give pure product **C**.

**1c: 5'H-spiro[cyclohexane-1,8'-tetrazolo[1,5-a]pyrazin]-6'(7'H)-one**

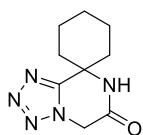

The product was obtained using procedure A, 67 % as white solid, M.P. = 142-144 °C; SFC-MS (ESI) m/z calcd for C<sub>9</sub>H<sub>13</sub>N<sub>5</sub>O [M]<sup>+</sup>: 207.11; found [M+H]<sup>+</sup>: 208.16. <sup>1</sup>H NMR (500 MHz, CDCl<sub>3</sub>) δ 7.92 (s, 1H), 5.08 (s, 2H), 2.24 – 2.14 (m, 2H), 2.03 – 1.94 (m, 2H), 1.90 – 1.83 (m, 2H), 1.78 – 1.58 (m, 4H); <sup>13</sup>C NMR (126 MHz, CDCl<sub>3</sub>) δ 162.9, 154.0, 54.3, 47.5, 38.1, 24.2, 20.9.

**2c: 8,8-diethyl-7,8-dihydro-tetrazolo[1,5-a]pyrazin-6(5H)-one**

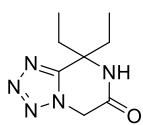

The product was obtained using procedure A, 58 % as white solid, M.P. = 150-152 °C; SFC-MS (ESI) m/z calcd for C<sub>8</sub>H<sub>13</sub>N<sub>5</sub>O [M]<sup>+</sup>: 195.11; found [M+H]<sup>+</sup>: 196.20. <sup>1</sup>H NMR (500 MHz, CDCl<sub>3</sub>) δ 7.42 (s, 1H), 5.09 (s, 2H), 2.28 (dq, J = 14.7, 7.4 Hz, 2H), 1.97 (dq, J = 14.7, 7.4 Hz, 2H), 0.80 (t, J = 7.4 Hz, 6H); <sup>13</sup>C NMR (126 MHz, CDCl<sub>3</sub>) δ 163.6, 152.1, 60.3, 47.4, 34.7, 8.0.

**3c: 1-benzyl-5'H-spiro[piperidine-4,8'-tetrazolo[1,5-a]pyrazin]-6'(7'H)-one**

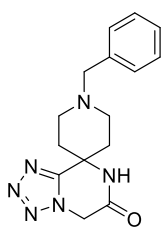

The product was obtained using procedure A, 67 % as white solid, M.P. = 204-206 °C; SFC-MS (ESI) m/z calcd for C<sub>15</sub>H<sub>18</sub>N<sub>6</sub>O [M]<sup>+</sup>: 298.15; found [M+H]<sup>+</sup>: 299.18. <sup>1</sup>H NMR (500 MHz, DMSO) δ 8.95 (s, 1H), 7.35 – 7.31 (m, 4H), 7.28 – 7.23 (m, 1H), 5.12 (s, 2H), 3.58 (s, 2H), 2.76 – 2.65 (m, 4H), 2.04 – 1.95 (m, 4H); <sup>13</sup>C NMR (126 MHz, DMSO) δ 162.9, 153.3, 138.6, 128.8, 128.2, 126.9, 61.8, 51.8, 48.0, 47.5, 37.0.

**4c: benzyl 6'-oxo-6',7'-dihydro-5'H-spiro[piperidine-4,8'-tetrazolo[1,5-a]pyrazine]-1-carboxylate**

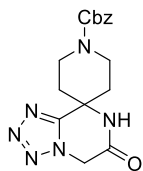

The product was obtained using procedure A, 69 % as white solid, M.P. = 138-140 °C; SFC-MS (ESI) m/z calcd for C<sub>16</sub>H<sub>18</sub>N<sub>6</sub>O<sub>3</sub> [M]<sup>+</sup>: 342.14; found [M-H]<sup>+</sup>: 341.08. <sup>1</sup>H NMR (500 MHz, CDCl<sub>3</sub>) δ 8.82 (s, 1H), 7.42 – 7.29 (m, 5H), 5.14 (s, 2H), 5.06 (s, 2H), 3.99 – 3.74 (m, 4H), 2.23 – 2.07 (m, 2H), 2.04 – 1.82 (m, 2H). <sup>13</sup>C NMR (126 MHz, CDCl<sub>3</sub>) δ 163.4, 155.0, 152.4, 136.2, 128.5, 128.1, 127.8, 67.4, 52.8, 47.4, 39.3, 37.3.

**12c: 8-(4-chlorophenyl)-5,5-dimethyl-7,8-dihydro-tetrazolo[1,5-a]pyrazin-6(5H)-one**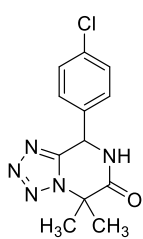

The product was obtained using procedure A, 22 % as white solid, M.P. = 130-132 °C; SFC-MS (ESI) m/z calcd for C<sub>12</sub>H<sub>12</sub>ClN<sub>5</sub>O [M]<sup>+</sup>: 277.07; found [M-H]<sup>+</sup>: 276.10. <sup>1</sup>H NMR (500 MHz, CDCl<sub>3</sub>) δ 7.53 (s, 1H), 7.41 – 7.36 (m, 2H), 7.35 – 7.30 (m, 2H), 6.11 (d, *J* = 2.2 Hz, 1H), 1.92 (s, 3H), 1.84 (s, 3H). <sup>13</sup>C NMR (126 MHz, CDCl<sub>3</sub>) δ 170.0, 148.2, 135.7, 134.7, 129.7, 127.8, 62.6, 51.6, 27.6, 26.3.

**13c: 5,5,8,8-tetramethyl-7,8-dihydro-tetrazolo[1,5-a]pyrazin-6(5H)-one**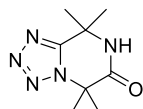

The product was obtained using procedure A, 72 % as white solid, M.P. = 207-209 °C; SFC-MS (ESI) m/z calcd for C<sub>8</sub>H<sub>13</sub>N<sub>5</sub>O [M]<sup>+</sup>: 195.11; found [M+H]<sup>+</sup>: 196.20; <sup>1</sup>H NMR (500 MHz, CDCl<sub>3</sub>) δ 7.99 (s, 1H), 1.88 (d, *J* = 1.6 Hz, 6H), 1.79 (s, 6H); <sup>13</sup>C NMR (126 MHz, CDCl<sub>3</sub>) δ 169.7, 153.1, 62.2, 51.7, 30.5, 27.1.

**14c: 8-ethyl-5,5,8-trimethyl-7,8-dihydro-tetrazolo[1,5-a]pyrazin-6(5H)-one**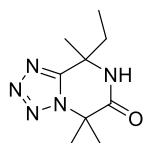

The product was obtained using procedure A, 62 % as white solid, M.P. = 181-183 °C; SFC-MS (ESI) m/z calcd for C<sub>9</sub>H<sub>15</sub>N<sub>5</sub>O [M]<sup>+</sup>: 209.13; found [M+H]<sup>+</sup>: 210.21; <sup>1</sup>H NMR (500 MHz, CDCl<sub>3</sub>) δ 7.69 (s, 1H), 2.33 – 2.19 (m, 1H), 2.02 – 1.94 (m, 1H), 1.92 (s, 3H), 1.90 (s, 3H), 1.78 (s, 3H), 0.80 (d, *J* = 7.3 Hz, 3H); <sup>13</sup>C NMR (126 MHz, CDCl<sub>3</sub>) δ 170.1, 151.9, 62.0, 55.6, 35.8, 29.5, 27.6, 27.2, 8.3.

**15c: 8-isobutyl-5,5,8-trimethyl-7,8-dihydro-tetrazolo[1,5-a]pyrazin-6(5H)-one**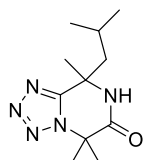

The product was obtained using procedure A, 67 % as white solid, M.P. = 169-171 °C; SFC-MS (ESI) m/z calcd for C<sub>11</sub>H<sub>19</sub>N<sub>5</sub>O [M]<sup>+</sup>: 237.16; found [M+H]<sup>+</sup>: 238.16; <sup>1</sup>H NMR (500 MHz, CDCl<sub>3</sub>) δ 7.91 (s, 1H), 2.26 – 2.17 (m, 1H), 1.91 (s, 3H), 1.87 (s, 3H), 1.75 (s, 3H), 1.51 – 1.39 (m, 1H), 0.89 (d, *J* = 6.7 Hz, 3H), 0.57 (d, *J* = 6.7 Hz, 3H); <sup>13</sup>C NMR (126 MHz, CDCl<sub>3</sub>) δ 169.9, 152.3, 62.0, 55.0, 50.4, 31.4, 27.9, 26.8, 24.6, 24.0, 23.0.

**16c: 8,8-diethyl-5,5-dimethyl-7,8-dihydro-tetrazolo[1,5-a]pyrazin-6(5H)-one**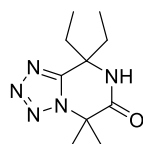

The product was obtained using procedure A, 62 % as white solid, M.P. = 167-169 °C; SFC-MS (ESI) m/z calcd for C<sub>10</sub>H<sub>17</sub>N<sub>5</sub>O [M]<sup>+</sup>: 223.14; found [M+H]<sup>+</sup>: 224.19; <sup>1</sup>H NMR (500 MHz, CDCl<sub>3</sub>) δ 2.34 – 2.22 (m, 2H), 2.00 – 1.91 (m, 2H), 1.90 (s, 6H), 0.75 (t, *J* = 7.4 Hz, 6H); <sup>13</sup>C NMR (126 MHz, CDCl<sub>3</sub>) δ 170.9, 150.7, 61.8, 60.1, 34.9, 34.9, 27.7, 8.1.



**23c: 5',5'-dimethyl-5'H-spiro[cyclopentane-1,8'-tetrazolo[1,5-a]pyrazin]-6'(7'H)-one**

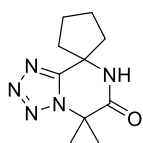

The product was obtained using procedure A, 68 % as white solid, M.P. = 152-154 °C; SFC-MS (ESI) m/z calcd for C<sub>10</sub>H<sub>15</sub>N<sub>5</sub>O [M]<sup>+</sup>: 221.13; found [M+H]<sup>+</sup>: 222.20; <sup>1</sup>H NMR (500 MHz, CDCl<sub>3</sub>) δ 8.09 (s, 1H), 2.49 – 2.25 (m, 2H), 2.21 – 1.96 (m, 6H), 1.80 (s, 6H); <sup>13</sup>C NMR (126 MHz, CDCl<sub>3</sub>) δ 169.8, 153.3, 62.1, 60.7, 42.2, 26.9, 23.7.

**24c: 2,2,5',5'-tetramethyl-5'H-spiro[cyclopentane-1,8'-tetrazolo[1,5-a]pyrazin]-6'(7'H)-one.**

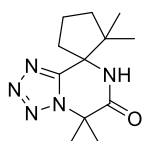

The product was obtained using procedure A, 8 % as white solid, M.P. = 212-214 °C; SFC-MS (ESI) m/z calcd for C<sub>12</sub>H<sub>19</sub>N<sub>5</sub>O [M]<sup>+</sup>: 249.16; found [M-H]<sup>+</sup>: 248.18; <sup>1</sup>H NMR (500 MHz, CDCl<sub>3</sub>) δ 7.57 (s, 1H), 2.52 – 2.37 (m, 1H), 2.31 – 2.06 (m, 3H), 2.06 – 1.94 (m, 1H), 1.88 (s, 6H), 1.80 – 1.69 (m, 1H), 1.07 (s, 3H), 0.74 (s, 3H), <sup>13</sup>C NMR (126 MHz, CDCl<sub>3</sub>) δ 170.4, 151.4, 66.3, 61.7, 47.9, 38.4, 37.3, 27.9, 27.7, 23.7, 23.5, 18.7.

**25c: methyl 5',5'-dimethyl-6'-oxo-6',7'-dihydro-5'H-spiro[cyclohexane-1,8'-tetrazolo[1,5-a]pyrazine]-2-carboxylate**

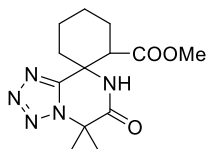

The product was obtained using procedure A, 14 % as white solid, M.P. = 90-92 °C; SFC-MS (ESI) m/z calcd for C<sub>13</sub>H<sub>19</sub>N<sub>5</sub>O<sub>3</sub> [M]<sup>+</sup>: 293.15; found [M-H]<sup>+</sup>: 292.39; <sup>1</sup>H NMR (500 MHz, CDCl<sub>3</sub>) (major) δ 7.90 (s, 1H), 3.50 (s, 3H), 2.75 (dd, *J* = 13.0, 3.9 Hz, 1H), 2.52 (qd, *J* = 13.3, 3.9 Hz, 1H), 2.24 (qt, *J* = 13.6, 4.2 Hz, 1H), 2.16 – 2.08 (m, 1H), 2.05 – 1.98 (m, 1H), 1.94 (s, 3H), 1.93 – 1.87 (m, 1H), 1.85 (s, 3H), 1.82 – 1.79 (m, 1H), 1.74 – 1.66 (m, 1H), 1.49 – 1.39 (m, 1H); <sup>13</sup>C NMR (126 MHz, CDCl<sub>3</sub>) (major) δ 171.8, 170.5, 149.9, 61.6, 55.1, 52.7, 51.9, 40.6, 28.4, 26.0, 25.7, 24.6, 21.1.

**26c: 5',5'-dimethyl-5'H-spiro[cyclohexane-1,8'-tetrazolo[1,5-a]pyrazin]-6'(7'H)-one**

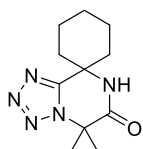

The product was obtained using procedure A, 87 % as white solid, M.P. = 169-171 °C; SFC-MS (ESI) m/z calcd for C<sub>11</sub>H<sub>17</sub>N<sub>5</sub>O [M]<sup>+</sup>: 235.14; found [M+H]<sup>+</sup>: 236.18; <sup>1</sup>H NMR (500 MHz, CDCl<sub>3</sub>) δ 7.54 (s, 1H), 2.25 – 2.13 (m, 2H), 2.01 – 1.92 (m, 2H), 1.88 (s, 6H), 1.85 – 1.78 (m, 2H), 1.74 – 1.65 (m, 3H), 1.63 – 1.54 (m, 1H); <sup>13</sup>C NMR (126 MHz, CDCl<sub>3</sub>) δ 169.6, 152.8, 62.0, 53.8, 38.6, 27.3, 24.3, 20.8.

**27c: 5',5'-dimethyl-4-phenyl-5'H-spiro[cyclohexane-1,8'-tetrazolo[1,5-a]pyrazin]-6'(7'H)-one**

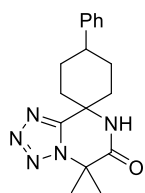

The product was obtained using procedure **A**, 81 % as oil; SFC-MS (ESI)  $m/z$  calcd for  $C_{17}H_{21}N_5O$   $[M]^+$ : 311.18; found  $[M+H]^+$ : 312.18;  $^1H$  NMR (500 MHz,  $CDCl_3$ ) (major)  $\delta$  7.94 (s, 1H), 7.43 – 7.39 (m, 2H), 7.35 (d,  $J = 7.5$  Hz, 2H), 7.27 – 7.22 (m, 1H), 2.75 – 2.65 (m, 1H), 2.63 – 2.48 (m, 2H), 2.19 – 2.10 (m, 2H), 2.03 – 1.88 (m, 10H);  $^{13}C$  NMR (126 MHz,  $CDCl_3$ )  $\delta$  170.1, 151.4, 145.6, 128.5, 127.1, 126.4, 61.9, 54.0, 42.8, 39.7, 29.4, 27.3.

**28c: benzyl 5',5'-dimethyl-6'-oxo-6',7'-dihydro-5'H-spiro[piperidine-4,8'-tetrazolo[1,5-a]pyrazine]-1-carboxylate**

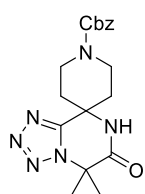

The product was obtained using procedure **A**, 87 % as white solid, M.P. = 185-187 °C; SFC-MS (ESI)  $m/z$  calcd for  $C_{18}H_{22}N_6O_3$   $[M]^+$ : 370.18; found  $[M+Na]^+$ : 393.32;  $^1H$  NMR (500 MHz,  $CDCl_3$ )  $\delta$  8.70 (s, 1H), 7.41 – 7.29 (m, 5H), 5.17 (s, 2H), 4.02 – 3.80 (m, 4H), 2.23 – 2.04 (m, 2H), 2.03 – 1.90 (m, 2H), 1.86 (s, 6H);  $^{13}C$  NMR (126 MHz,  $CDCl_3$ )  $\delta$  170.2, 155.1, 151.2, 136.3, 128.5, 128.1, 127.8, 67.4, 61.9, 52.4, 39.3, 37.8, 27.2.

**29c: ethyl 5',5'-dimethyl-6'-oxo-6',7'-dihydro-5'H-spiro[piperidine-4,8'-tetrazolo[1,5-a]pyrazine]-1-carboxylate**

The product was obtained using procedure **A**, 88 % as white solid, M.P. = 165-167 °C; SFC-MS (ESI)  $m/z$  calcd for  $C_{13}H_{20}N_6O_3$   $[M]^+$ : 308.16; found  $[M+Na]^+$ : 331.30;  $^1H$  NMR (500 MHz,  $CDCl_3$ )  $\delta$  8.37 (s, 1H), 4.28 – 4.12 (m, 2H), 4.01 – 3.76 (m, 4H), 2.20 – 2.07 (m, 2H), 1.98 – 1.79 (m, 8H), 1.28 (d,  $J = 7.1$  Hz, 3H);  $^{13}C$  NMR (126 MHz,  $CDCl_3$ )  $\delta$  170.1, 155.4, 151.3, 62.1, 61.8, 52.6, 39.2, 38.0, 27.3, 14.7.

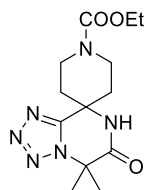

**36c: 5-isobutyl-8,8-dimethyl-7,8-dihydro-tetrazolo[1,5-a]pyrazin-6(5H)-one**

The product was obtained using procedure **A**, 75 % as white solid, M.P. = 163-165 °C; SFC-MS (ESI)  $m/z$  calcd for  $C_{10}H_{17}N_5O$   $[M]^+$ : 223.14; found  $[M-H]^+$ : 222.00;  $^1H$  NMR (500 MHz,  $CDCl_3$ )  $\delta$  7.92 (s, 1H), 5.12 (dd,  $J = 7.6, 4.9$  Hz, 1H), 2.20 – 2.12 (m, 1H), 2.03 – 1.89 (m, 2H), 1.82 (s, 3H), 1.77 (s, 3H), 0.98 (d,  $J = 1.2$  Hz, 3H), 0.97 (d,  $J = 1.3$  Hz, 3H);  $^{13}C$  NMR (126 MHz,  $CDCl_3$ )  $\delta$  166.5, 154.0, 57.8, 51.5, 42.3, 31.0, 29.3, 24.2, 22.7, 21.4.

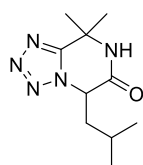

**37c: 5-isobutyl-8-isopropyl-8-methyl-7,8-dihydro-tetrazolo[1,5-a]pyrazin-6(5H)-one**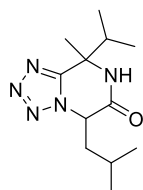

The product was obtained using procedure A, 46 % as white solid, M.P. = 185-187 °C; SFC-MS (ESI)  $m/z$  calcd for  $C_{12}H_{21}N_5O$   $[M]^+$ : 251.17; found  $[M-H]^+$ : 250.04;  $^1H$  NMR (500 MHz,  $CDCl_3$ ) (major)  $\delta$  7.18 (s, 1H), 5.07 (dd,  $J = 8.2, 4.8$  Hz, 1H), 2.26 – 2.10 (m, 3H), 1.93 (ddd,  $J = 13.5, 8.1, 5.2$  Hz, 1H), 1.72 (s, 3H), 1.07 (d,  $J = 6.5$  Hz, 3H), 1.03 (d,  $J = 3.5$  Hz, 3H), 1.01 (d,  $J = 3.5$  Hz, 3H), 0.92 (d,  $J = 6.5$  Hz, 3H);  $^{13}C$  NMR (126 MHz,  $CDCl_3$ ) (major)  $\delta$  167.1, 153.0, 58.1, 57.4, 43.5, 38.9, 26.1, 24.8, 22.7, 21.5, 17.4, 16.6.

**38c: 8-(hydroxymethyl)-5-isobutyl-8-methyl-7,8-dihydro-tetrazolo[1,5-a]pyrazin-6(5H)-one**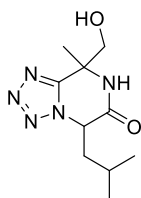

The product was obtained using procedure A, 65 % as oil; SFC-MS (ESI)  $m/z$  calcd for  $C_{10}H_{17}N_5O_2$   $[M]^+$ : 239.14; found  $[M-H]^+$ : 238.06;  $^1H$  NMR (500 MHz, MeOD) (Major)  $\delta$  5.21 (s, 1H), 3.86 (d,  $J = 11.1$  Hz, 1H), 3.72 (d,  $J = 11.1$  Hz, 1H), 3.61 – 3.52 (m, 1H), 2.33 – 2.27 (m, 1H), 2.22 – 2.16 (m, 1H), 1.92 – 1.83 (m, 1H), 1.67 (s, 3H), 1.00 (d,  $J = 6.6$  Hz, 3H), 0.83 (d,  $J = 6.6$  Hz, 3H);  $^{13}C$  NMR (126 MHz, MeOD) (major)  $\delta$  169.2, 154.0, 78.2, 70.0, 59.1, 44.8, 25.7, 23.3, 22.8, 21.8.

**41c: 5'-isobutyl-5'H-spiro[cyclohexane-1,8'-tetrazolo[1,5-a]pyrazin]-6'(7'H)-one**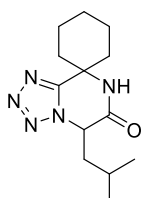

The product was obtained using procedure A, 80 % as white solid, M.P. = 226-228 °C; SFC-MS (ESI)  $m/z$  calcd for  $C_{13}H_{21}N_5O$   $[M]^+$ : 263.17; found  $[M-H]^+$ : 262.13;  $^1H$  NMR (500 MHz,  $CDCl_3$ )  $\delta$  7.68 (s, 1H), 5.11 (dd,  $J = 7.2, 5.1$  Hz, 1H), 2.35 – 2.21 (m, 1H), 2.18 – 2.01 (m, 3H), 2.01 – 1.92 (m, 2H), 1.91 – 1.77 (m, 3H), 1.75 – 1.57 (m, 4H), 0.99 (d,  $J = 1.4$  Hz, 3H), 0.97 (d,  $J = 1.4$  Hz, 3H);  $^{13}C$  NMR (126 MHz,  $CDCl_3$ )  $\delta$  166.7, 153.7, 57.7, 53.9, 42.9, 39.5, 37.4, 24.5, 24.3, 22.7, 21.6, 20.8, 20.6.

**42c: 1-benzyl-5'-isobutyl-5'H-spiro[piperidine-4,8'-tetrazolo[1,5-a]pyrazin]-6'(7'H)-one**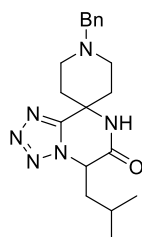

The product was obtained using procedure A, 76 % as white solid, M.P. = 203-205 °C; SFC-MS (ESI)  $m/z$  calcd for  $C_{19}H_{26}N_6O$   $[M]^+$ : 354.22; found  $[M+H]^+$ : 355.20;  $^1H$  NMR (500 MHz, DMSO)  $\delta$  8.98 (s, 1H), 7.36 – 7.30 (m, 4H), 7.29 – 7.21 (m, 1H), 5.22 (dd,  $J = 7.3, 4.8$  Hz, 1H), 3.58 (s, 2H), 2.87 – 2.78 (m, 1H), 2.76 – 2.64 (m, 3H), 2.07 – 1.89 (m, 6H), 1.88 – 1.77 (m, 1H), 0.90 (d,  $J = 6.6$  Hz, 3H), 0.86 (d,  $J = 6.6$  Hz, 3H);  $^{13}C$  NMR (126 MHz,  $CDCl_3$ )  $\delta$

165.5, 153.1, 138.6, 128.8, 128.2, 126.9, 61.8, 57.1, 51.6, 48.0, 41.4, 38.1, 36.8, 24.2, 22.7, 21.6.

**44c: 8,8-dimethyl-5-phenyl-7,8-dihydro-tetrazolo[1,5-a]pyrazin-6(5H)-one**

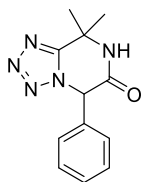

The product was obtained using procedure **A**, 70 % as white solid, M.P. = 180-182 °C; SFC-MS (ESI)  $m/z$  calcd for  $C_{12}H_{13}N_5O$   $[M]^+$ : 243.11; found  $[M-H]^+$ : 242.33;  $^1H$  NMR (500 MHz,  $CDCl_3$ )  $\delta$  7.92 (s, 1H), 7.41 (p,  $J = 3.6, 3.1$  Hz, 3H), 7.24 – 7.12 (m, 2H), 6.26 (s, 1H), 1.86 (s, 4H), 1.75 (s, 4H),  $^{13}C$  NMR (126 MHz,  $CDCl_3$ )  $\delta$  164.6, 154.6, 133.6, 129.6, 129.2, 126.8, 62.5, 52.1, 31.4, 29.6.

**45c: 8,8-diethyl-5-phenyl-7,8-dihydro-tetrazolo[1,5-a]pyrazin-6(5H)-one**

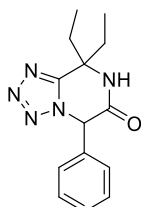

The product was obtained using procedure **A**, 63 % as white solid, M.P. = 209-216 °C; SFC-MS (ESI)  $m/z$  calcd for  $C_{14}H_{17}N_5O$   $[M]^+$ : 271.14; found  $[M-H]^+$ : 270.14;  $^1H$  NMR (500 MHz,  $CDCl_3$ )  $\delta$  7.41 – 7.36 (m, 3H), 7.34 (s, 1H), 7.22 – 7.13 (m, 2H), 6.15 (s, 1H), 2.32 – 2.17 (m, 2H), 2.00 – 1.83 (m, 2H), 0.87 (t,  $J = 7.4$  Hz, 3H), 0.73 (t,  $J = 7.3$  Hz, 3H);  $^{13}C$  NMR (126 MHz,  $CDCl_3$ )  $\delta$  165.7, 152.4, 133.9, 129.6, 129.1, 128.4, 127.3, 124.9, 62.3, 60.1, 34.7, 34.5, 8.5, 7.9.

**46c: 5'-phenyl-5'H-spiro[cyclohexane-1,8'-tetrazolo[1,5-a]pyrazin]-6'(7'H)-one**

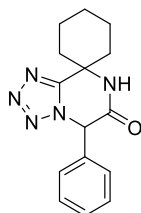

The product was obtained using procedure **A**, 75 % as white solid, M.P. = 218-220 °C; SFC-MS (ESI)  $m/z$  calcd for  $C_{15}H_{17}N_5O$   $[M]^+$ : 283.14; found  $[M-H]^+$ : 282.04;  $^1H$  NMR (500 MHz, DMSO)  $\delta$  9.13 (s, 1H), 7.49 – 7.33 (m, 3H), 7.28 – 7.10 (m, 2H), 6.41 (s, 1H), 2.09 – 1.58 (m, 9H), 1.38 (d,  $J = 12.4$  Hz, 1H);  $^{13}C$  NMR (126 MHz, DMSO)  $\delta$  163.7, 153.8, 135.5, 128.9, 127.6, 61.7, 53.4, 37.5, 24.2, 20.9, 20.7.

**47c: ethyl 6'-oxo-5'-phenyl-6',7'-dihydro-5'H-spiro[piperidine-4,8'-tetrazolo[1,5-a]pyrazine]-1-carboxylate**

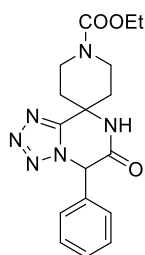

The product was obtained using procedure **A**, 65 % as white solid, M.P. = 190-192°C; SFC-MS (ESI)  $m/z$  calcd for  $C_{17}H_{20}N_6O_3$   $[M]^+$ : 356.16; found  $[M+Na]^+$ : 379.14;  $^1H$  NMR (500 MHz,  $CDCl_3$ )  $\delta$  8.64 (s, 1H), 7.46 – 7.30 (m, 3H), 7.18 – 7.01 (m, 2H), 6.25 (s, 1H), 4.30 – 4.11 (m, 2H), 4.10 – 3.97 (m, 1H), 3.91 – 3.51 (m, 3H), 2.37 – 2.22 (m, 1H), 2.11 – 1.72 (m, 3H), 1.28 (t,  $J = 7.2$  Hz, 3H);  $^{13}C$  NMR (126 MHz,  $CDCl_3$ )  $\delta$  165.2, 155.2, 152.9, 133.4, 129.5, 129.1, 126.5, 62.0, 61.6, 52.7, 39.0, 38.6, 36.5, 14.5.

**48c: 1-benzyl-5'-phenyl-5'H-spiro[piperidine-4,8'-tetrazolo[1,5-a]pyrazin]-6'(7'H)-one**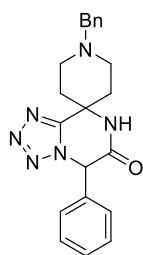

The product was obtained using procedure A, 68 % as white solid, M.P. = 138-140 °C; SFC-MS (ESI) m/z calcd for C<sub>21</sub>H<sub>22</sub>N<sub>6</sub>O [M]<sup>+</sup>: 374.19; found [M+H]<sup>+</sup>: 375.23; <sup>1</sup>H NMR (500 MHz, CDCl<sub>3</sub>) δ 7.50 – 7.45 (m, 2H), 7.39 – 7.34 (m, 2H), 7.34 – 7.28 (m, 5H), 7.28 – 7.23 (m, 1H), 7.01 (s, 1H), 4.69 (s, 1H), 3.52 (s, 2H), 2.64 – 2.41 (m, 4H), 1.93 – 1.78 (m, 4H); <sup>13</sup>C NMR (126 MHz, CDCl<sub>3</sub>) δ 175.6, 138.5, 138.2, 129.0, 128.6, 128.2, 127.9, 127.5, 127.0, 72.5, 62.6, 62.1, 50.3, 50.1, 39.4, 38.4.

**50c: 5-benzyl-8,8-dimethyl-7,8-dihydro-tetrazolo[1,5-a]pyrazin-6(5H)-one**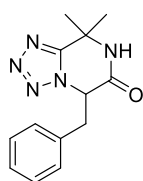

The product was obtained using procedure A, 79 % as white solid, M.P. = 176-178 °C; SFC-MS (ESI) m/z calcd for C<sub>13</sub>H<sub>15</sub>N<sub>5</sub>O [M]<sup>+</sup>: 257.13; found [M-H]<sup>+</sup>: 256.27; <sup>1</sup>H NMR (500 MHz, CDCl<sub>3</sub>) δ 7.23 – 7.03 (m, 3H), 6.82 – 6.63 (m, 2H), 5.55 – 5.34 (m, 1H), 3.81 – 3.55 (m, 2H), 1.67 (s, 3H), 0.72 (s, 3H); <sup>13</sup>C NMR (126 MHz, CDCl<sub>3</sub>) δ 164.6, 154.5, 133.0, 129.7, 128.9, 127.9, 60.0, 51.9, 38.3, 30.2.

**51c: 5-benzyl-8-ethyl-8-methyl-7,8-dihydro-tetrazolo[1,5-a]pyrazin-6(5H)-one**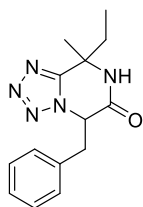

The product was obtained using procedure A, 65 % as white solid, M.P. = 233-235 °C; SFC-MS (ESI) m/z calcd for C<sub>14</sub>H<sub>17</sub>N<sub>5</sub>O [M]<sup>+</sup>: 271.14; found [M-H]<sup>+</sup>: 270.14; <sup>1</sup>H NMR (500 MHz, CDCl<sub>3</sub>) (major) δ 7.66 (s, 1H), 7.14 – 7.10 (m, 3H), 6.76 – 6.66 (m, 2H), 5.44 (dd, *J* = 4.7, 3.0 Hz, 1H), 3.71 – 3.62 (m, 2H), 2.17 – 2.09 (m, 1H), 1.86 – 1.77 (m, 1H), 0.76 (s, 3H), 0.67 (t, *J* = 7.3 Hz, 3H); <sup>13</sup>C NMR (126 MHz, CDCl<sub>3</sub>) (major) δ 165.4, 153.5, 132.9, 129.6, 128.8, 127.8, 59.7, 55.6, 38.3, 35.5, 28.7, 8.0.

**52c: 5'-benzyl-5'H-spiro[cyclohexane-1,8'-tetrazolo[1,5-a]pyrazin]-6'(7'H)-one**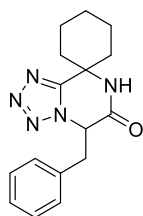

The product was obtained using procedure A, 86 % as white solid, M.P. = 145-146 °C; SFC-MS (ESI) m/z calcd for C<sub>16</sub>H<sub>19</sub>N<sub>5</sub>O [M]<sup>+</sup>: 297.16; found [M+H]<sup>+</sup>: 298.24; <sup>1</sup>H NMR (500 MHz, CDCl<sub>3</sub>) δ 7.59 (s, 1H), 7.23 – 7.09 (m, 3H), 6.91 – 6.66 (m, 2H), 5.53 – 5.42 (m, 1H), 3.78 – 3.61 (m, 2H), 2.19 – 2.07 (m, 1H), 2.03 – 1.91 (m, 1H), 1.77 – 1.68 (m, 1H), 1.67 – 1.39 (m, 4H), 1.38 – 1.20 (m, 1H), 1.04 – 0.89 (m, 1H), 0.31 – 0.19 (m, 1H); <sup>13</sup>C NMR (126 MHz, CDCl<sub>3</sub>) δ 164.6, 154.2, 133.0, 129.7, 128.7, 127.8, 59.8, 53.8, 38.3, 37.8, 24.1, 20.6, 20.5.

**53c: 5'-benzyl-4-phenyl-5'H-spiro[cyclohexane-1,8'-tetrazolo[1,5-a]pyrazin]-6'(7'H)-one**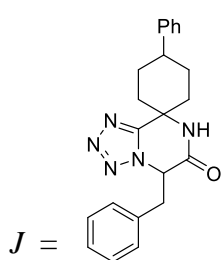

The product was obtained using procedure **A**, 87 % as white solid, M.P. = 213-216 °C; SFC-MS (ESI)  $m/z$  calcd for  $C_{22}H_{23}N_5O$   $[M]^+$ : 337.19; found  $[M-H]^+$ : 372.21;  $^1H$  NMR (500 MHz,  $CDCl_3$ )  $\delta$  7.56 (s, 1H), 7.38 – 7.28 (m, 4H), 7.23 – 7.18 (m, 1H), 7.17 – 7.10 (m, 3H), 6.84 – 6.66 (m, 2H), 5.50 (dd, 4.9, 3.0 Hz, 1H), 3.89 – 3.54 (m, 2H), 2.66 (qd,  $J = 13.1, 3.7$  Hz, 1H), 2.51 (tt,  $J = 12.6, 3.8$  Hz, 2H), 2.12 – 2.03 (m, 1H), 2.03 – 1.91 (m, 2H), 1.90 – 1.58 (m, 3H), 1.53 – 1.43 (m, 1H), 1.29 (td,  $J = 13.5, 3.9$  Hz, 1H);  $^{13}C$  NMR (126 MHz,  $CDCl_3$ )  $\delta$  165.1, 152.8, 145.7, 133.1, 129.7, 128.8, 128.5, 128.4, 127.8, 127.0, 126.8, 126.4, 59.7, 54.1, 42.7, 39.4, 39.1, 38.4, 29.2, 29.1.

**54c: 5'-benzyl-1-methyl-5'H-spiro[piperidine-4,8'-tetrazolo[1,5-a]pyrazin]-6'(7'H)-one**

The product was obtained using procedure **A**, 43 % as white solid, M.P. = 111-113 °C; SFC-MS (ESI)  $m/z$  calcd for  $C_{16}H_{20}N_6O$   $[M]^+$ : 312.17; found  $[M+H]^+$ : 313.17;  $^1H$  NMR (500 MHz, DMSO)  $\delta$  8.96 (s, 1H), 7.20 – 7.10 (m, 3H), 6.72 – 6.62 (m, 2H), 5.61 (dd,  $J = 4.8, 3.2$  Hz, 1H), 3.57 (dd,  $J = 14.0, 3.3$  Hz, 1H), 3.48 (dd,  $J = 14.0, 4.8$  Hz, 1H), 2.94 – 2.80 (m, 1H), 2.80 – 2.69 (m, 1H), 2.47 – 2.38 (m, 2H), 2.28 (s, 3H), 2.04 – 1.84 (m, 2H), 1.08 – 0.71 (m, 1H), 0.68 – 0.18 (m, 1H);  $^{13}C$  NMR (126 MHz, DMSO)  $\delta$  164.0, 153.2, 134.0, 129.4, 128.4, 127.4, 59.2, 50.5, 49.3, 49.0, 44.6, 37.7, 36.8, 35.7.

**55c: 1,5'-dibenzyl-5'H-spiro[piperidine-4,8'-tetrazolo[1,5-a]pyrazin]-6'(7'H)-one**

The product was obtained using procedure **A**, 86 % as white solid, M.P. = 140-142 °C; SFC-MS (ESI)  $m/z$  calcd for  $C_{22}H_{24}N_6O$   $[M]^+$ : 388.20; found  $[M+H]^+$ : 389.22;  $^1H$  NMR (500 MHz,  $CDCl_3$ )  $\delta$  8.12 (s, 1H), 7.32 – 7.27 (m, 4H), 7.25 – 7.21 (m, 1H), 7.14 – 7.06 (m, 3H), 6.76 – 6.70 (m, 2H), 5.48 (dd,  $J = 4.8, 3.0$  Hz, 1H), 3.76 – 3.63 (m, 2H), 3.57 (s, 2H), 3.00 – 2.93 (m, 1H), 2.65 – 2.56 (m, 1H), 2.53 – 2.45 (m, 1H), 2.32 – 2.18 (m, 2H), 1.09 – 0.77 (m, 1H), 0.68 – 0.38 (m, 1H);  $^{13}C$  NMR (126 MHz,  $CDCl_3$ )  $\delta$  164.8, 153.5, 137.9, 132.9, 129.6, 128.8, 128.7, 128.2, 127.8, 127.1, 62.5, 59.7, 52.3, 47.8, 47.4, 38.3, 38.0, 37.4.

**56c: ethyl 5'-benzyl-6'-oxo-6',7'-dihydro-5'H-spiro[piperidine-4,8'-tetrazolo[1,5-a]pyrazine]-1-carboxylate**

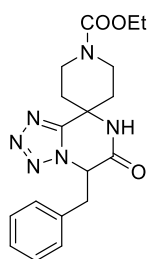

The product was obtained using procedure A, 88 % as white solid, M.P. = 115-117 °C; SFC-MS (ESI)  $m/z$  calcd for  $C_{18}H_{22}N_6O_3$   $[M]^+$ : 370.18; found  $[M-H]^+$ : 369.12;  $^1H$  NMR (500 MHz,  $CDCl_3$ )  $\delta$  8.36 (s, 1H), 7.24 – 7.06 (m, 3H), 6.68 (dt,  $J = 7.6, 2.3$  Hz, 2H), 5.47 (dt,  $J = 4.8, 2.4$  Hz, 1H), 4.22 – 4.01 (m, 2H), 3.99 – 3.85 (m, 1H), 3.79 (d,  $J = 14.5$  Hz, 1H), 3.73 – 3.58 (m, 2H), 3.40 (dt,  $J = 16.4, 9.7$  Hz, 2H), 2.15 – 1.96 (m, 1H), 1.89 – 1.68 (m, 1H), 1.24 (d,  $J = 7.2$  Hz, 3H), 0.66 (ddd,  $J = 13.3, 8.1, 4.9$  Hz, 1H), 0.51 – 0.34 (m, 1H);  $^{13}C$  NMR (126 MHz,  $CDCl_3$ )  $\delta$  165.2, 155.1, 152.6, 132.8, 129.5, 128.7, 127.9, 61.5, 59.6, 52.3, 38.7, 38.2, 37.5, 36.9, 14.5.

**61c: 5-((1H-indol-3-yl)methyl)-8,8-dimethyl-7,8-dihydrotetrazolo[1,5-a]pyrazin-6(5H)-one**

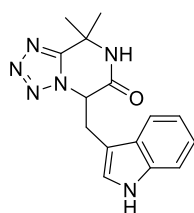

The product was obtained using procedure A, 62 % as white solid, M.P. = 247-249 °C; SFC-MS (ESI)  $m/z$  calcd for  $C_{15}H_{16}N_6O$   $[M]^+$ : 296.14; found  $[M+Na]^+$ : 319.20;  $^1H$  NMR (500 MHz, DMSO)  $\delta$  10.88 (s, 1H), 8.69 (s, 1H), 7.24 (d,  $J = 8.1$  Hz, 1H), 7.16 (d,  $J = 8.0$  Hz, 1H), 7.01 – 6.96 (m, 1H), 6.89 – 6.83 (m, 1H), 6.49 (d,  $J = 2.4$  Hz, 1H), 5.54 – 5.50 (m, 1H), 3.75 (dd,  $J = 14.8, 3.0$  Hz, 1H), 3.56 (dd,  $J = 14.8, 4.7$  Hz, 1H), 1.41 (s, 3H), 0.38 (s, 3H);  $^{13}C$  NMR (126 MHz, DMSO)  $\delta$  164.1, 154.8, 135.6, 127.0, 124.2, 124.1, 121.1, 118.7, 118.1, 111.3, 106.3, 59.5, 50.4, 29.5, 29.2, 28.3.

**62c: 5-((1H-indol-3-yl)methyl)-8,8-diethyl-7,8-dihydrotetrazolo[1,5-a]pyrazin-6(5H)-one**

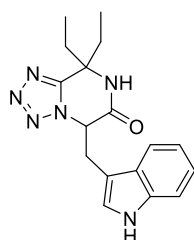

The product was obtained using procedure A, 62 % as white solid, M.P. = 234-236 °C; SFC-MS (ESI)  $m/z$  calcd for  $C_{17}H_{20}N_6O$   $[M]^+$ : 324.17; found  $[M+Na]^+$ : 347.36;  $^1H$  NMR (500 MHz, DMSO)  $\delta$  10.82 (s, 1H), 8.52 (s, 1H), 7.31 (d,  $J = 8.0$  Hz, 1H), 7.21 (d,  $J = 8.1$  Hz, 1H), 7.03 – 6.93 (m, 1H), 6.85 (t,  $J = 7.4$  Hz, 1H), 6.58 (d,  $J = 2.5$  Hz, 1H), 5.65 (dd,  $J = 4.6, 2.9$  Hz, 1H), 3.81 (dd,  $J = 14.8, 3.0$  Hz, 1H), 3.67 (dd,  $J = 14.9, 4.7$  Hz, 1H), 1.78 (dq,  $J = 14.4, 7.3$  Hz, 1H), 1.64 (dq,  $J = 14.5, 7.3$  Hz, 1H), 1.24 (dq,  $J = 14.7, 7.4$  Hz, 1H), 1.05 (dq,  $J = 14.6, 7.4$  Hz, 1H), 0.48 (t,  $J = 7.3$  Hz, 3H), -0.41 (t,  $J = 7.4$  Hz, 3H),  $^{13}C$  NMR (126 MHz, DMSO)  $\delta$  165.4, 152.5, 135.8, 127.2, 124.5, 121.0, 118.5, 118.3, 111.1, 106.3, 59.1, 58.1, 33.9, 32.7, 27.5, 7.6, 6.0.

**66c: 5'-((1H-indol-3-yl)methyl)-5'H-spiro[cyclohexane-1,8'-tetrazolo[1,5-a]pyrazin]-6'(7'H)-one**

The product was obtained using procedure A, 88 % as white solid, M.P. = 190-192 °C; SFC-

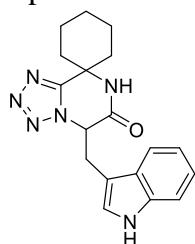

MS (ESI)  $m/z$  calcd for  $C_{18}H_{20}N_6O$   $[M]^+$ : 336.17; found  $[M+Na]^+$ : 359.22;  $^1H$  NMR (500 MHz,  $CDCl_3$ )  $\delta$  8.00 (s, 1H), 7.38 (d,  $J = 8.0$  Hz, 1H), 7.24 (d,  $J = 8.2$  Hz, 1H), 7.15 – 7.07 (m, 1H), 7.07 – 6.98 (m, 1H), 6.53 (d,  $J = 2.4$  Hz, 1H), 6.42 (s, 1H), 5.45 (dd,  $J = 4.9, 2.7$  Hz, 1H), 4.00 (dd,  $J = 14.9, 2.7$  Hz, 1H), 3.79 (dd,  $J = 14.9, 4.9$  Hz, 1H), 2.05 (ddd,  $J = 14.3, 10.6, 4.2$

Hz, 1H), 1.88 (dt,  $J = 13.6, 5.0$  Hz, 1H), 1.40 (tdd,  $J = 13.9, 6.6, 2.9$  Hz, 2H), 1.36 – 1.19 (m, 2H), 0.88 (t,  $J = 8.2$  Hz, 2H), -0.08 (d,  $J = 10.7$  Hz, 1H);  $^{13}C$  NMR (126 MHz,  $CDCl_3$ )  $\delta$  165.1, 154.3, 135.6, 127.0, 123.8, 122.5, 120.3, 118.8, 110.9, 107.3, 59.8, 53.7, 38.1, 37.8, 29.2, 23.9, 20.7, 20.2.

**67c: 5'-((1H-indol-3-yl)methyl)-1-methyl-5'H-spiro[piperidine-4,8'-tetrazolo[1,5-a]pyrazin]-6'(7'H)-one**

The product was obtained using procedure A, 41 % as oil; SFC-MS (ESI)  $m/z$  calcd for

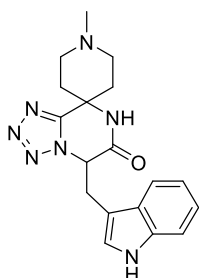

$C_{18}H_{21}N_7O$   $[M]^+$ : 351.18; found  $[M+H]^+$ : 352.17;  $^1H$  NMR (500 MHz, DMSO)  $\delta$  10.86 (s, 1H), 8.70 (s, 1H), 7.22 (d,  $J = 8.1$  Hz, 1H), 7.07 (d,  $J = 7.9$  Hz, 1H), 7.03 – 6.89 (m, 1H), 6.89 – 6.72 (m, 1H), 6.51 (d,  $J = 2.4$  Hz, 1H), 5.53 (dd,  $J = 4.6, 2.9$  Hz, 1H), 3.73 (dd,  $J = 14.8, 3.0$  Hz, 1H), 3.56 (dd,  $J = 14.8, 4.6$  Hz, 1H), 2.08 (s, 3H), 2.05 – 1.95 (m, 2H), 1.86 –

1.63 (m, 2H), 0.86 – 0.49 (m, 1H), 0.24 – -0.15 (m, 1H);  $^{13}C$  NMR (126 MHz, DMSO)  $\delta$  164.8, 153.4, 135.6, 127.0, 124.2, 121.1, 118.7, 118.0, 111.2, 106.4, 59.4, 50.8, 49.6, 49.3, 37.4, 36.5, 28.4.

**68c: 5'-((1H-indol-3-yl)methyl)-1-benzyl-5'H-spiro[piperidine-4,8'-tetrazolo[1,5-a]pyrazin]-6'(7'H)-one**

The product was obtained using procedure A, 85 % as oil; SFC-MS (ESI)  $m/z$  calcd for

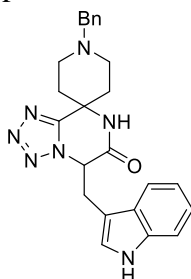

$C_{24}H_{25}N_7O$   $[M]^+$ : 427.21; found  $[M+H]^+$ : 428.25;  $^1H$  NMR (500 MHz, MeOD)  $\delta$  7.42 – 7.16 (m, 7H), 7.10 (dd,  $J = 8.0, 2.7$  Hz, 1H), 6.99 (td,  $J = 7.6, 2.5$  Hz, 1H), 6.86 (td,  $J = 7.5, 2.7$  Hz, 1H), 6.59 (s, 1H), 5.54 (dt,  $J = 4.5, 2.9$  Hz, 1H), 3.89 – 3.78 (m, 1H), 3.71 (dt,  $J = 14.9, 3.8$  Hz, 1H), 3.46 (s, 2H), 2.94 – 2.84 (m, 1H), 2.63 – 2.50 (m, 1H), 2.22 – 2.07 (m,

1H), 2.07 – 1.88 (m, 2H), 1.79 (tt,  $J = 9.6, 3.8$  Hz, 1H), 0.69 – 0.41 (m, 1H), 0.32 – -0.05 (m,



1H); <sup>13</sup>C NMR (126 MHz, MeOD) δ 167.3, 138.5, 137.3, 130.3, 129.2, 128.3, 125.2, 122.5, 120.2, 119.0, 112.1, 107.5, 104.2, 63.2, 61.3, 53.0, 38.3, 37.5, 29.9.

**1c: 5'H-spiro[cyclohexane-1,8'-tetrazolo[1,5-a]pyrazin]-6'(7'H)-one.**

| Parameter | Value            |
|-----------|------------------|
| 1 Title   | PHP_TS03.1.1.fid |
| 2 Solvent | CDCl3            |

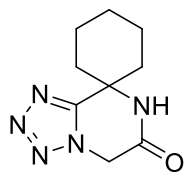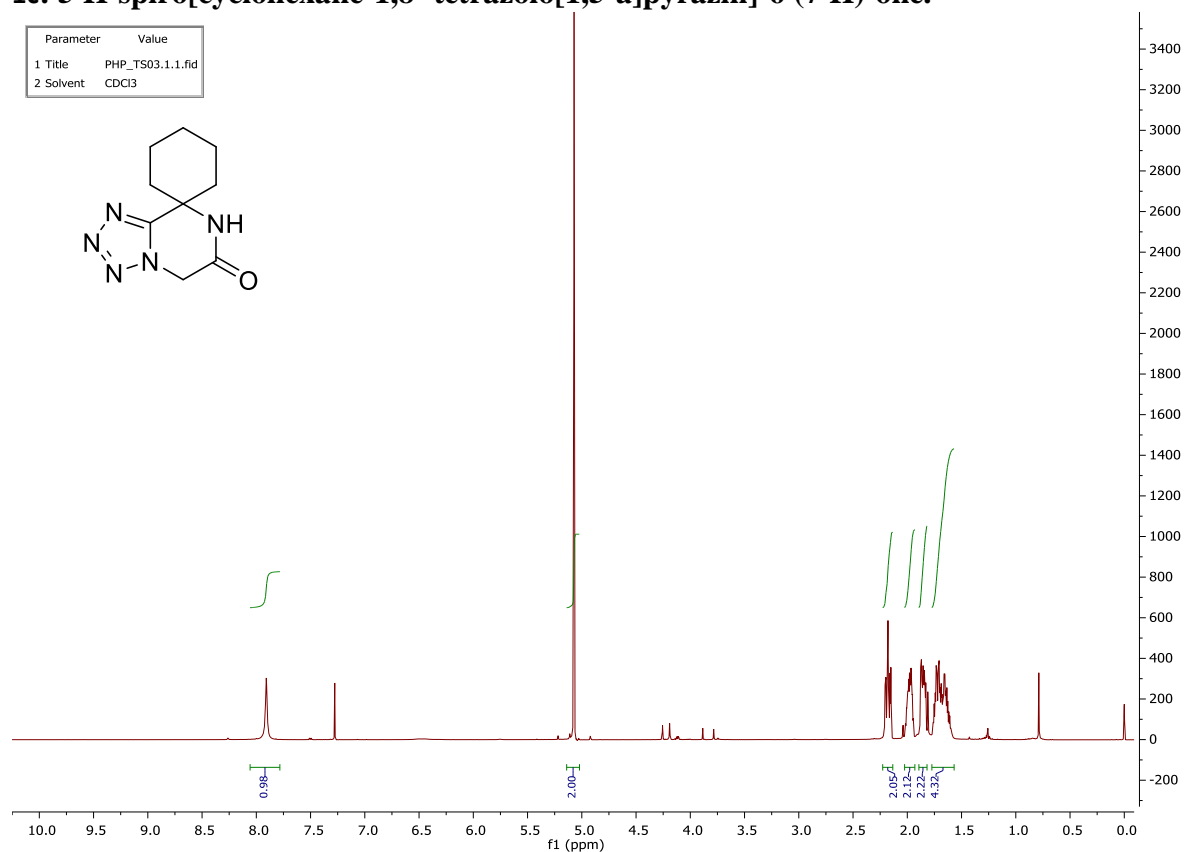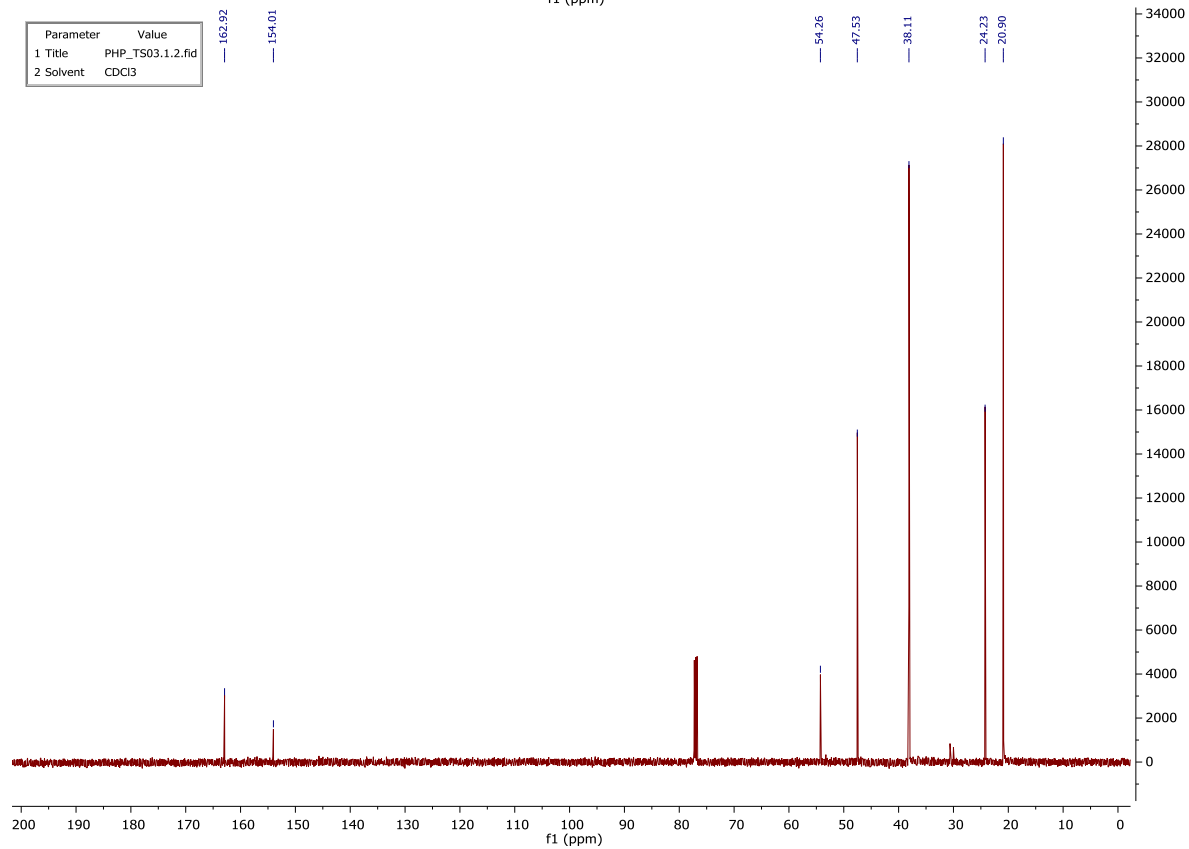

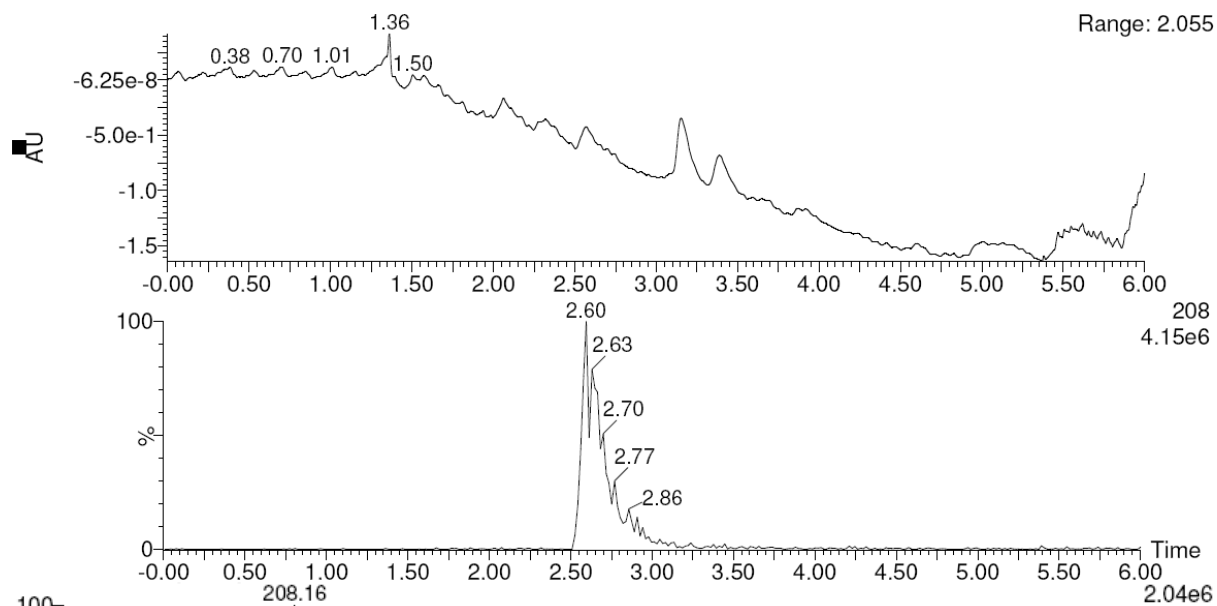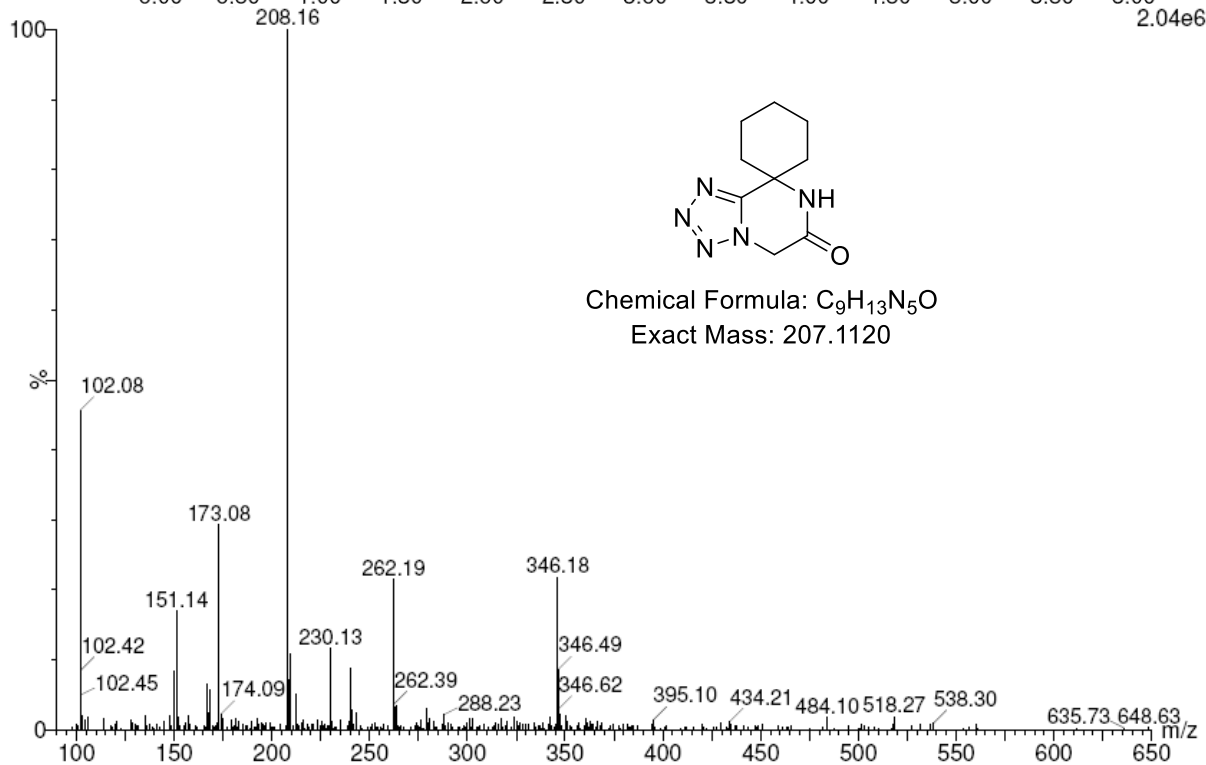

**2c: 2c: 8,8-diethyl-7,8-dihydro-tetrazolo[1,5-a]pyrazin-6(5H)-one.**

PHP\_T10.1.fidTitle  
CDCl3 Solvent

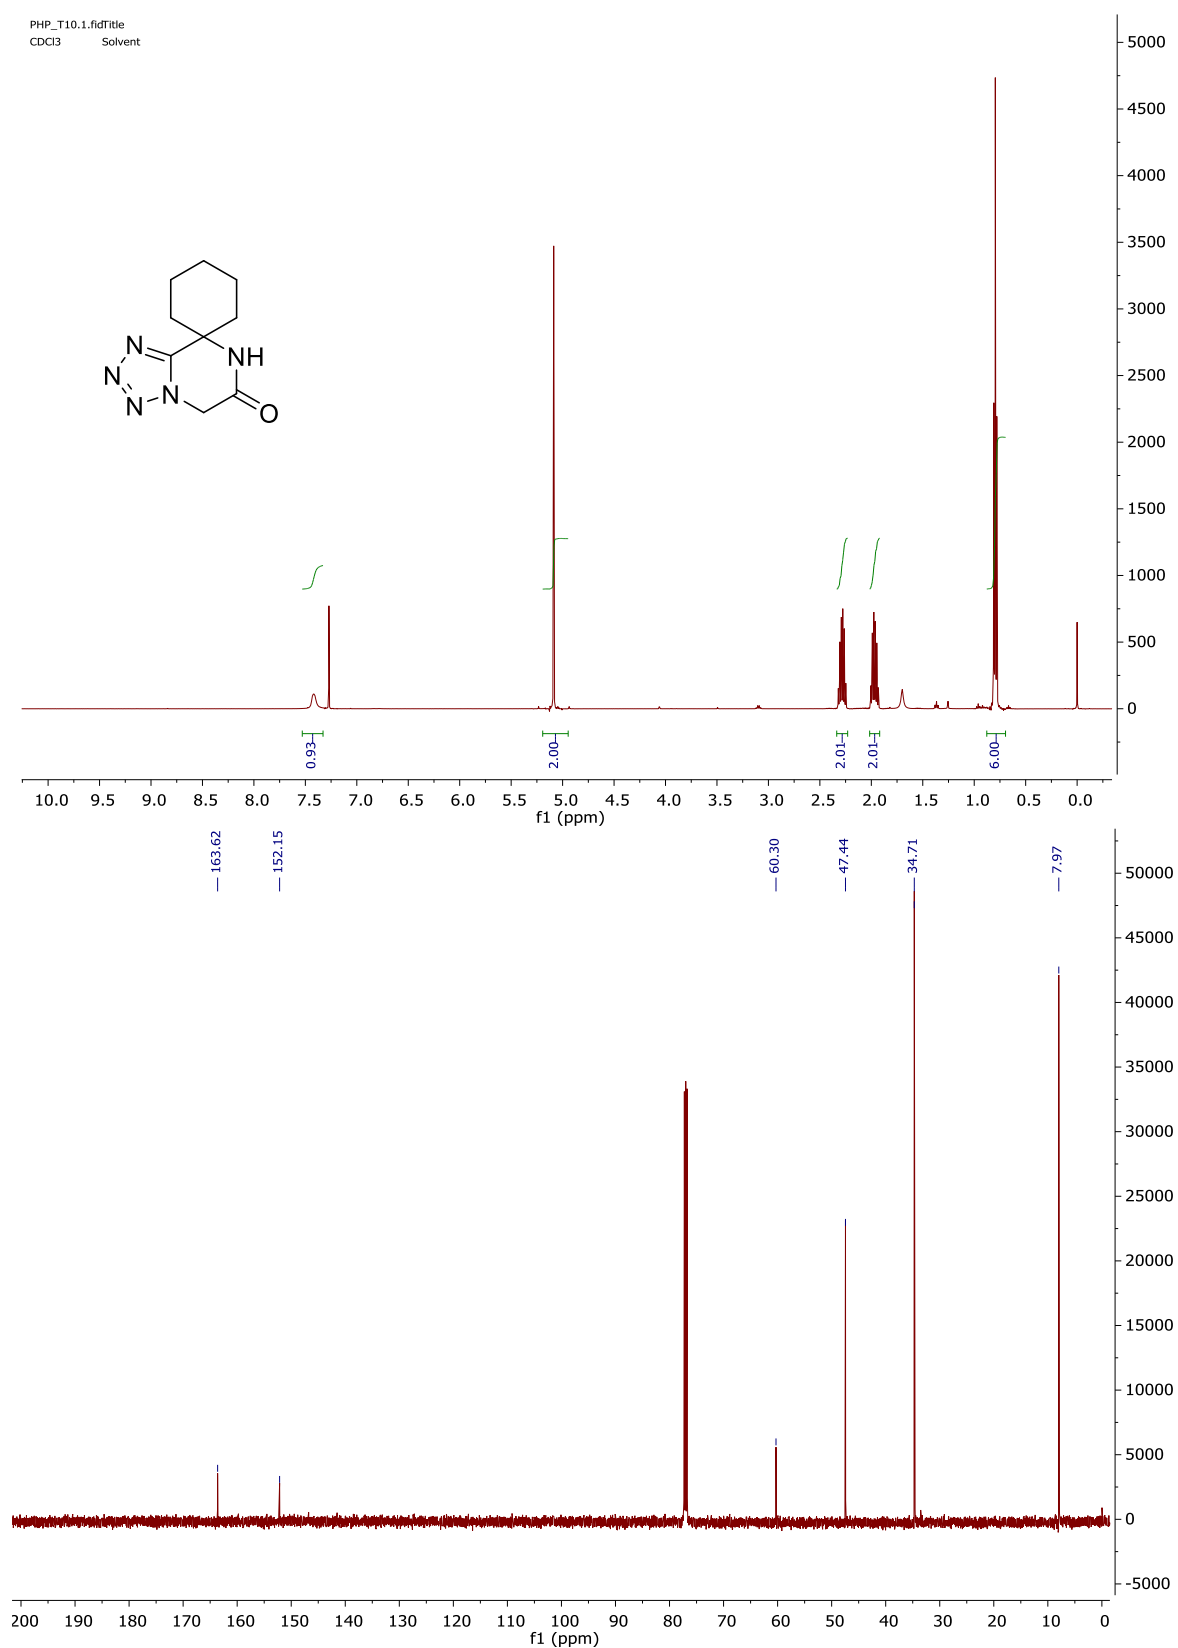

PHPT10\_cr\_1\_Col4\_Sol1\_5-30%\_6min

PHPT10\_cr\_1

3: Diode Array  
Range: 2.387

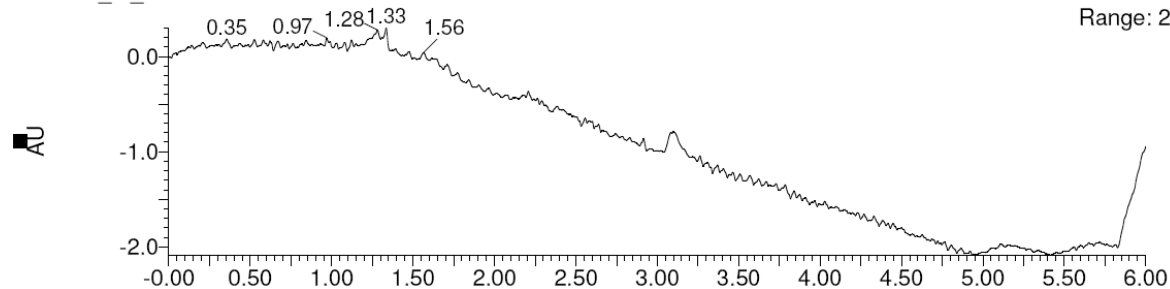

PHPT10\_cr\_1

1: Scan ES+  
196  
4.58e6

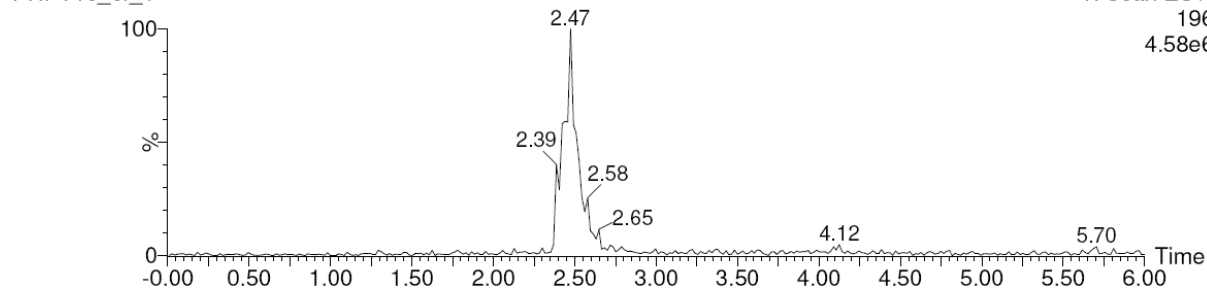

PHPT10\_cr\_1\_Col4\_Sol1\_5-30%\_6min

PHPT10\_cr\_1 143 (2.475)

1: Scan ES+  
4.58e6

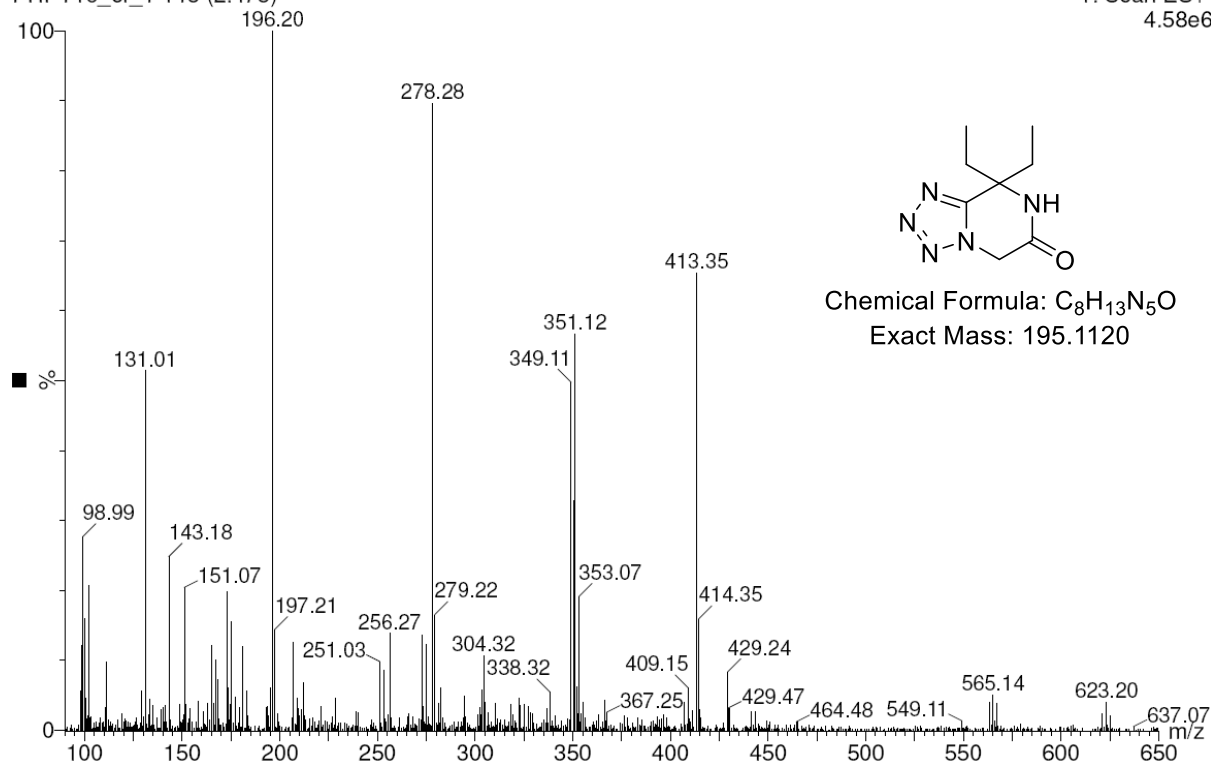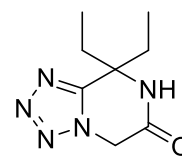

Chemical Formula: C<sub>8</sub>H<sub>13</sub>N<sub>5</sub>O  
Exact Mass: 195.1120

### 3c: 1-benzyl-5'H-spiro[piperidine-4,8'-tetrazolo[1,5-a]pyrazin]-6'(7'H)-one.

PHP1411/10  
PHP1411  
PROTON DMSO {C:\NMR data\DD} Patil 11

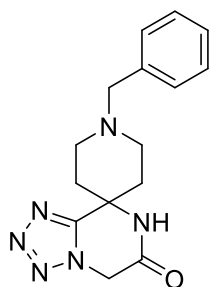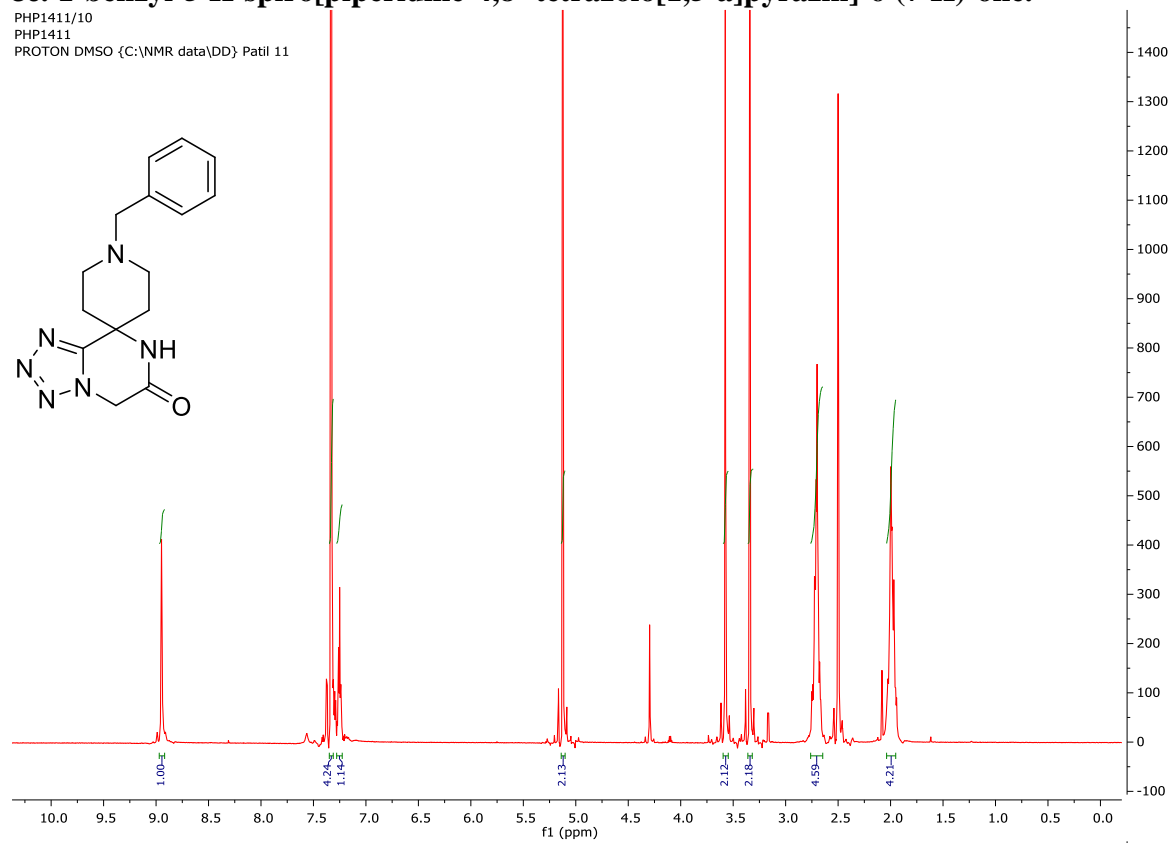

PHP1411/6  
PHP1411  
C13 DMSO {C:\NMR data\DD} Patil 10

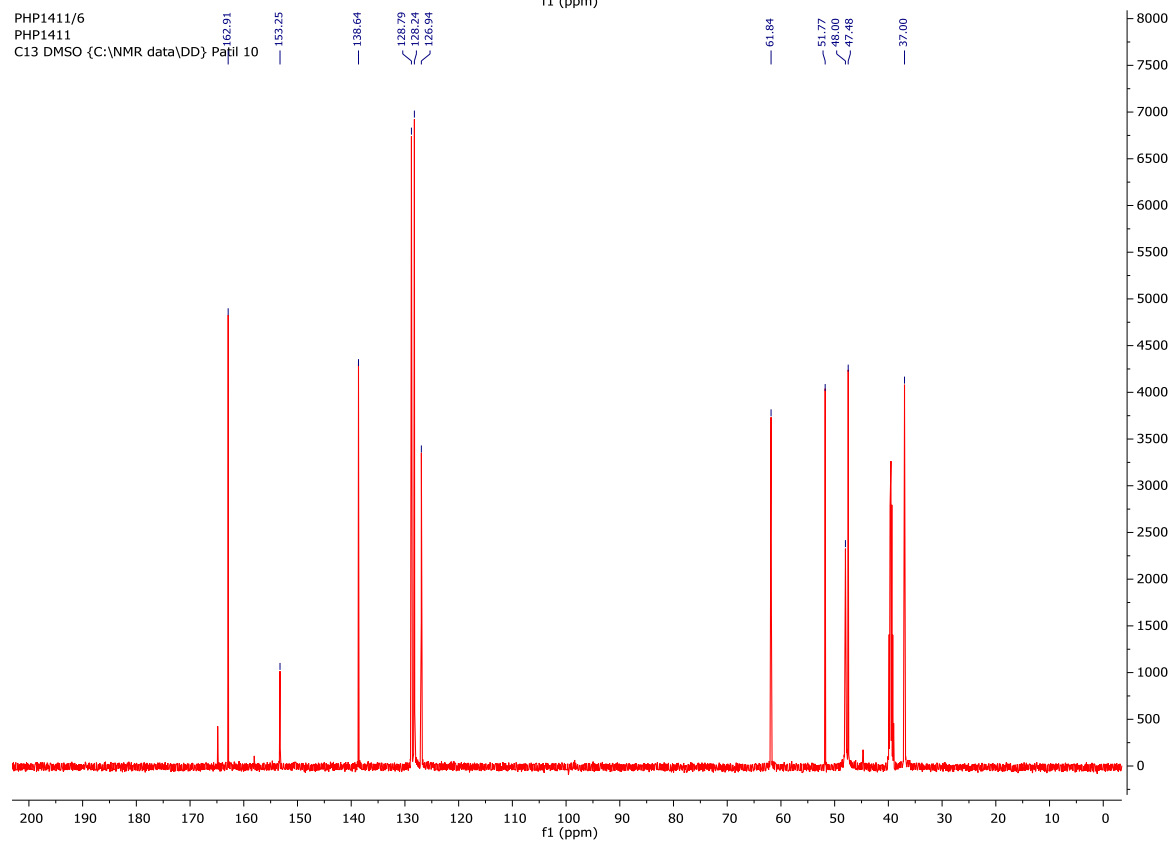

PHP\_1411\_1\_Col3\_Sol1\_5-30%\_6min

PHP\_1411\_1

3: Diode Array  
Range: 2.686

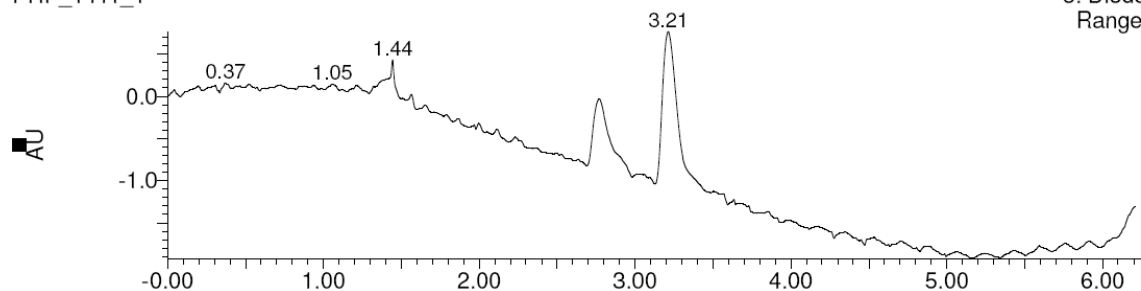

PHP\_1411\_1

1: Scan ES+  
299  
1.29e9

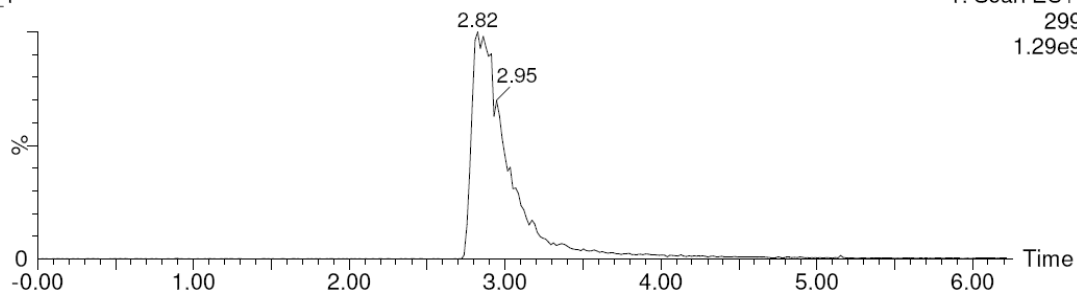

PHP\_1411\_1\_Col3\_Sol1\_5-30%\_6min

PHP\_1411\_1 163 (2.825) Cm (161:180)

1: Scan ES+  
9.13e7

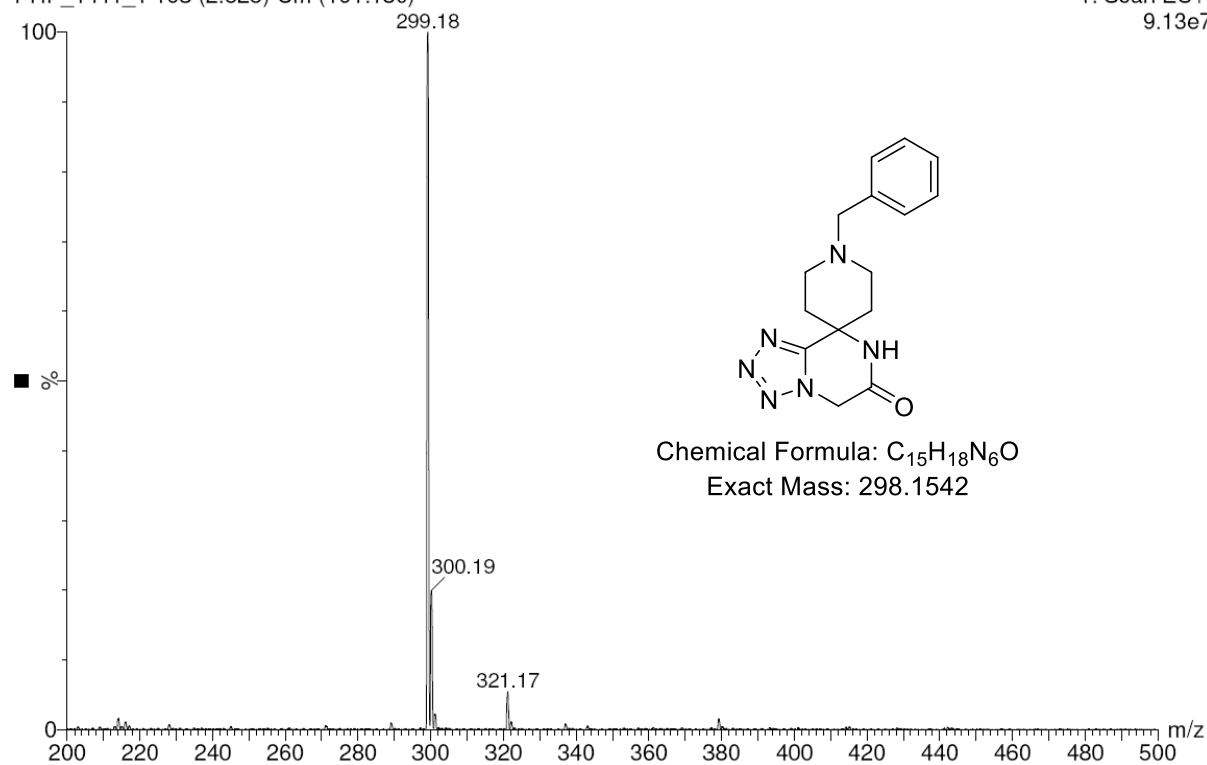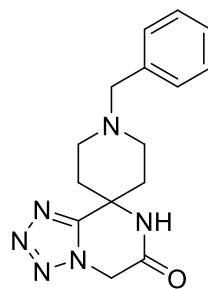

Chemical Formula: C<sub>15</sub>H<sub>18</sub>N<sub>6</sub>O  
Exact Mass: 298.1542

# 4c: benzyl 6'-oxo-6',7'-dihydro-5'H-spiro[piperidine-4,8'-tetrazolo[1,5-a]pyrazine]-1-carboxylate.

PHP1412/1  
PHP1412

PROTON CDCl3 {C:\NMR\data\DD\Patil 2

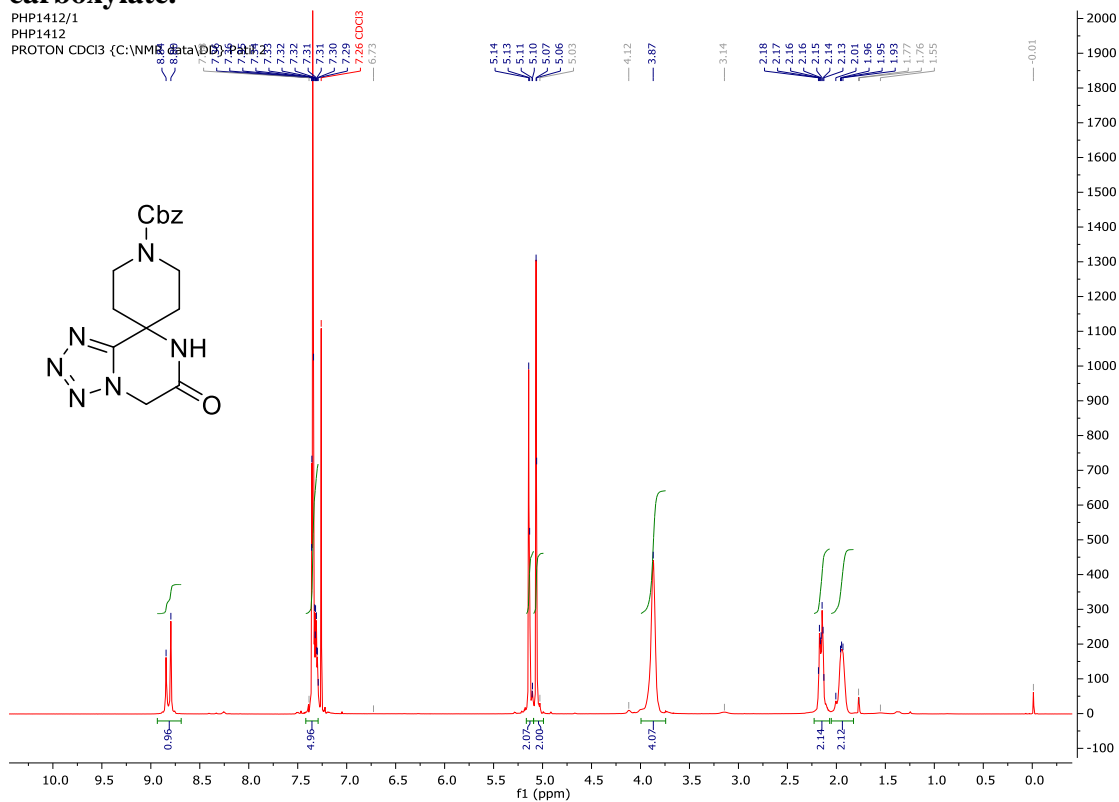

PHP1412/2  
PHP1412

C13 CDCl3 {C:\NMR\data\DD\Patil 2

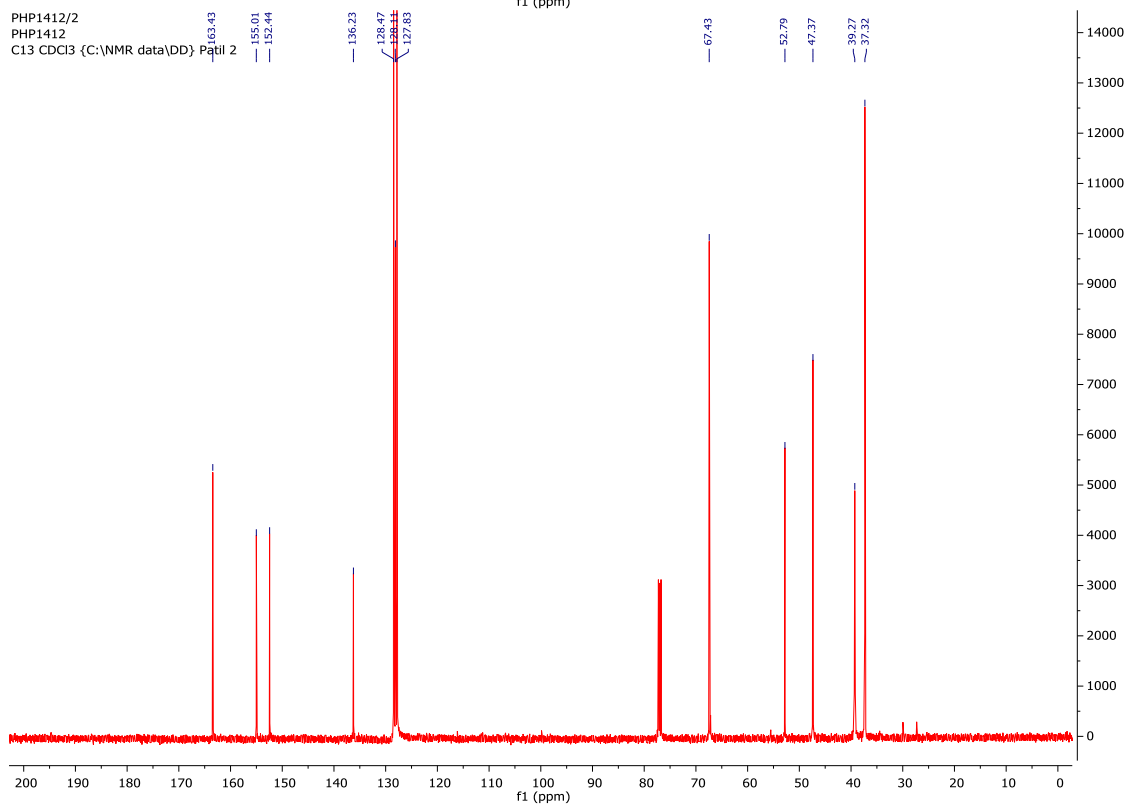



PHP\_1412\_1\_Col3\_Sol1\_5-30%\_6min

PHP\_1412\_1

3: Diode Array  
Range: 9.891e-1

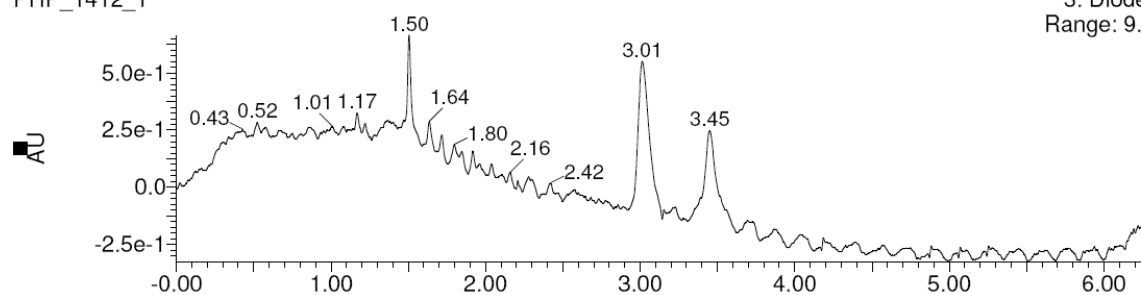

PHP\_1412\_1

1: Scan ES+  
343  
6.45e7

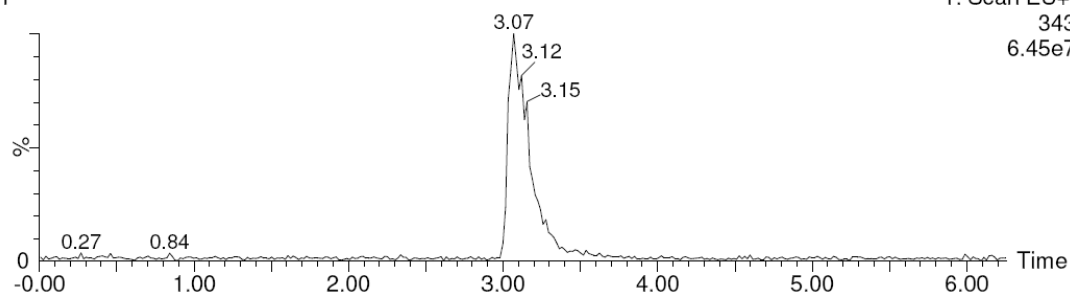

PHP\_1412\_1\_Col3\_Sol1\_5-30%\_6min

PHP\_1412\_1 176 (3.059) Cm (172:192)

2: Scan ES-  
4.94e6

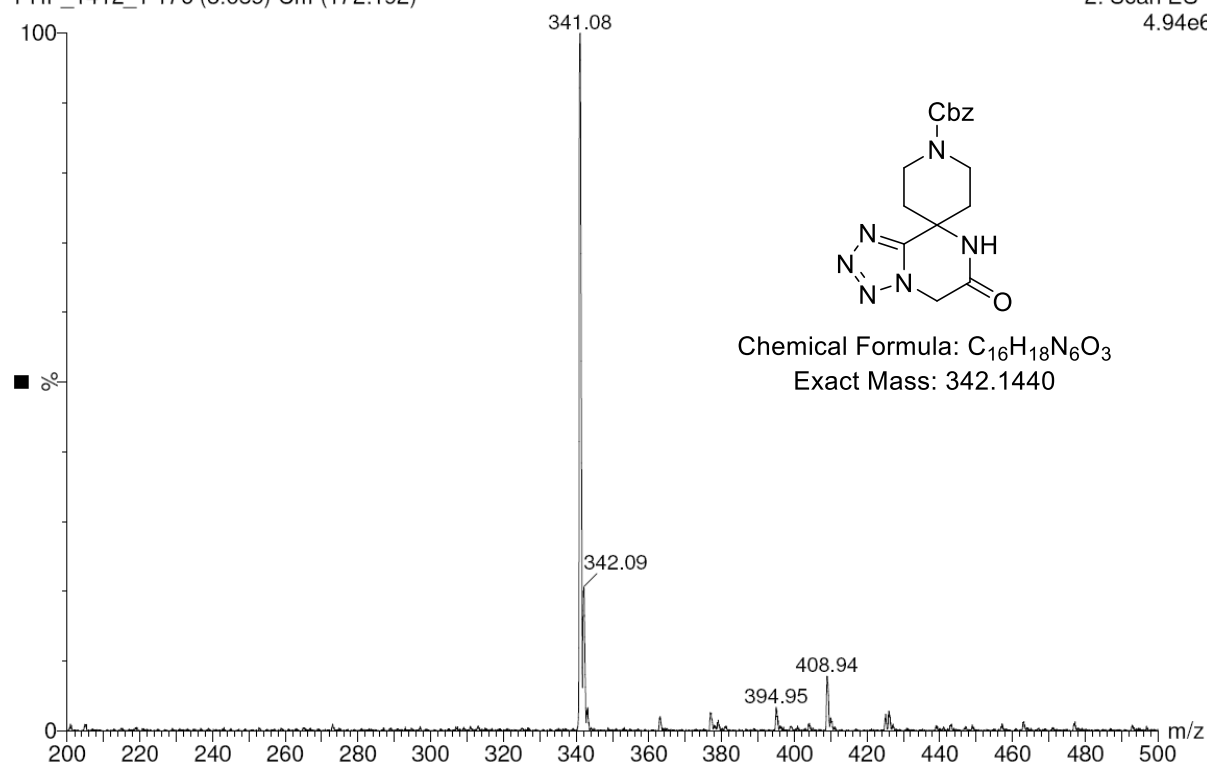

# 12c: 12c: 8-(4-chlorophenyl)-5,5-dimethyl-7,8-dihydro-1H-tetrazolo[1,5-a]pyrazin-6(5H)-one.

PHP616.10.fid  
PHP616  
PROTON CDCl3 {C:\NMR data\DD} Patil 6

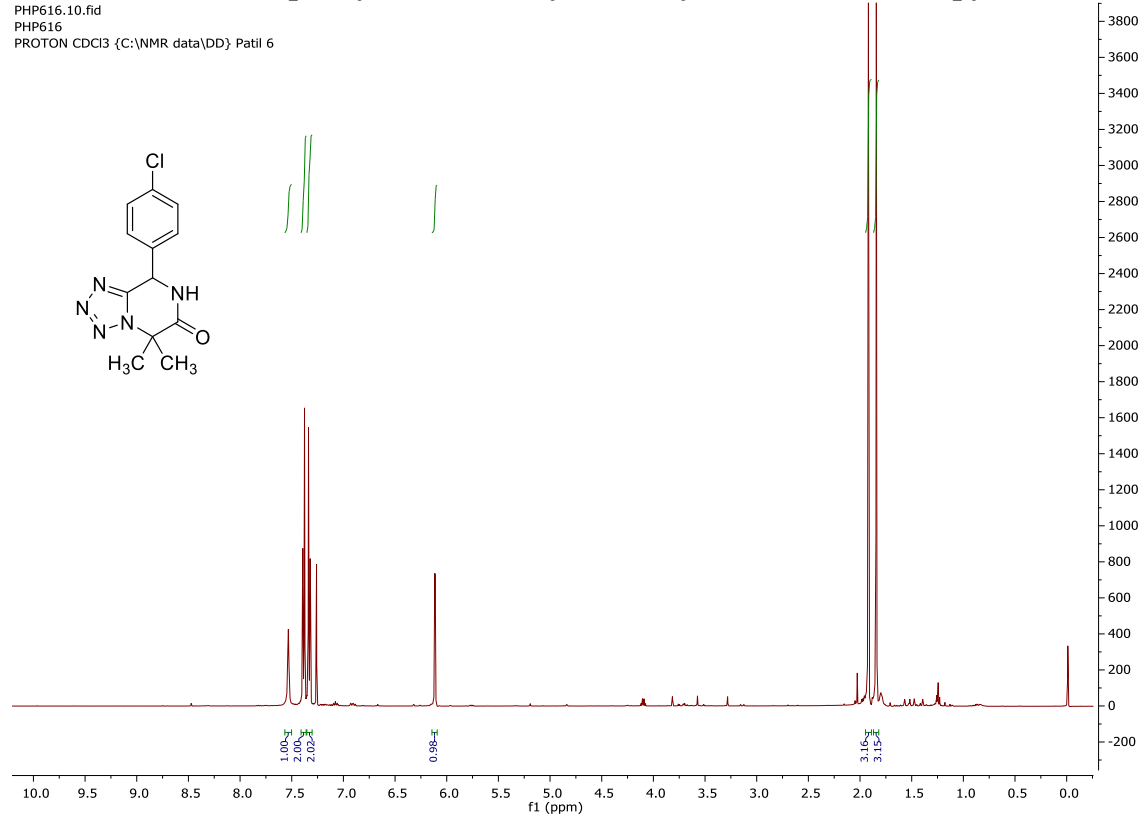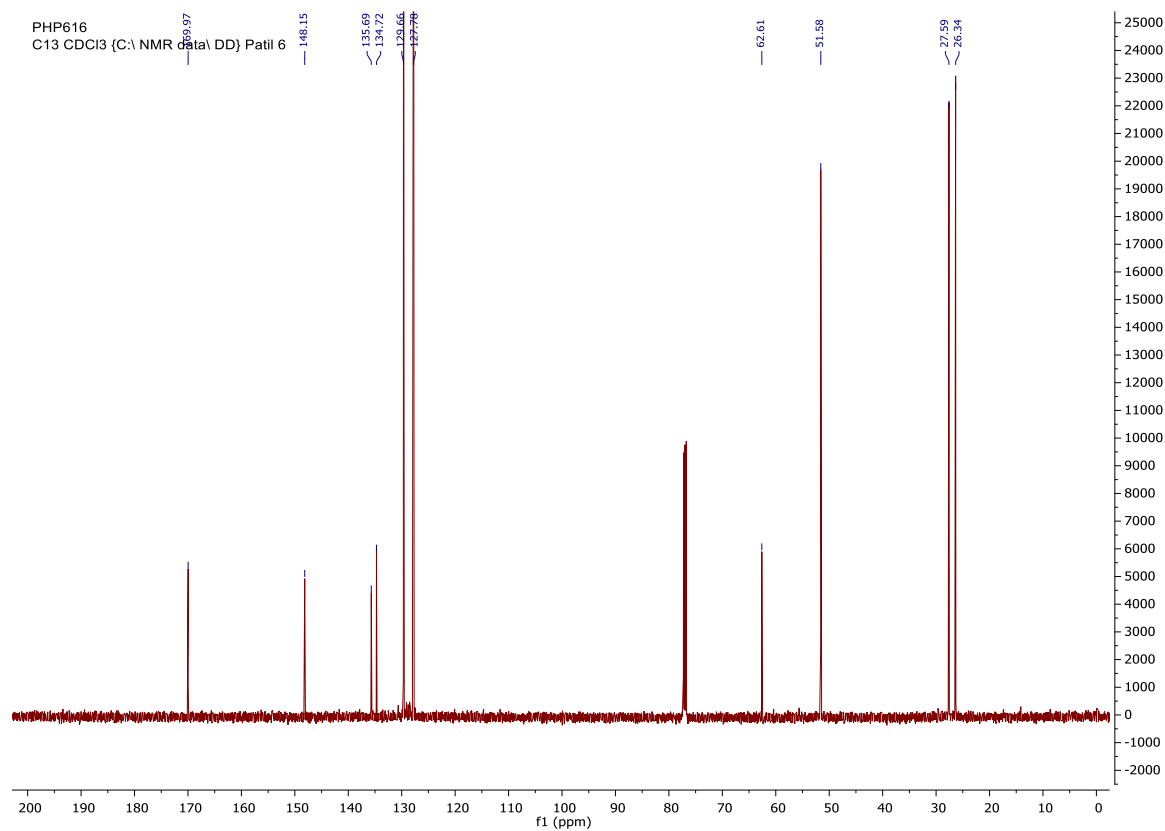

PHP616\_2\_Col4\_Sol1\_5-30%\_6min

PHP616\_2

3: Diode Array  
Range: 9.351

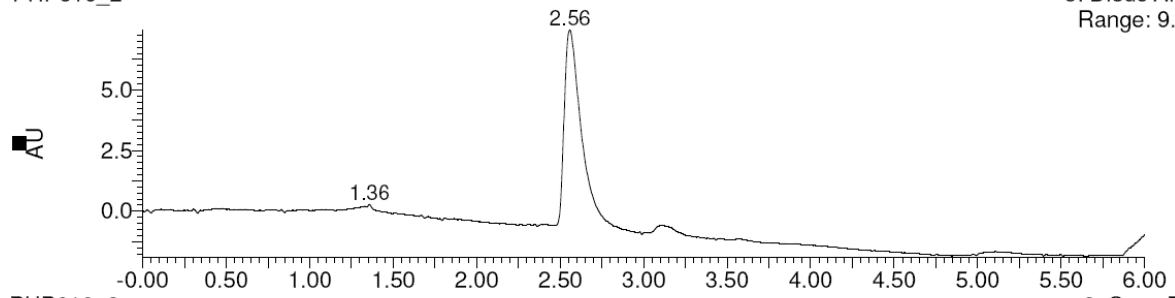

PHP616\_2

2: Scan ES-  
276  
2.95e6

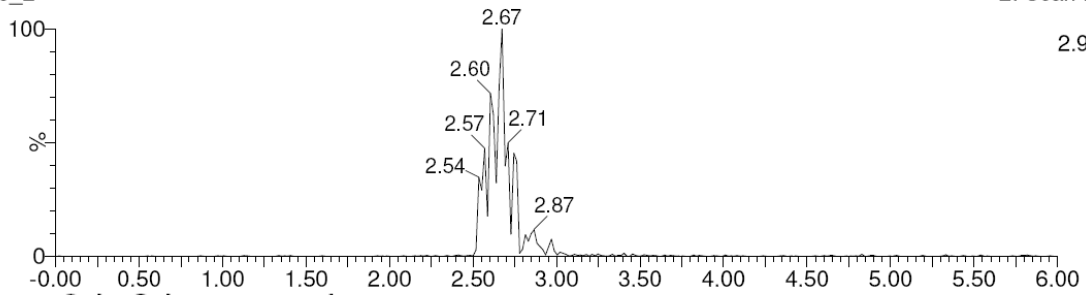

PHP616\_2\_Col4\_Sol1\_5-30%\_6min

PHP616\_2 150 (2.605)

2: Scan ES-  
2.11e6

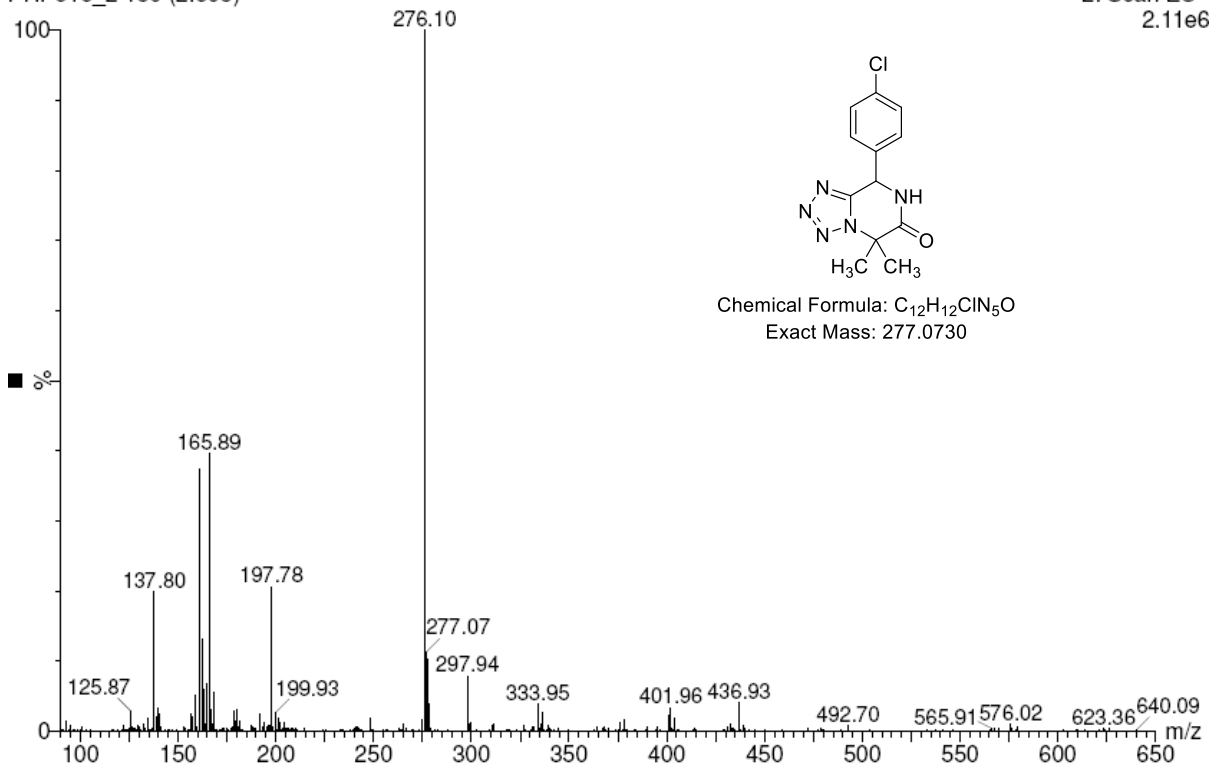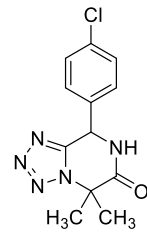

Chemical Formula: C<sub>12</sub>H<sub>12</sub>ClN<sub>5</sub>O  
Exact Mass: 277.0730

### 13c: 13c: 5,5,8,8-tetramethyl-7,8-dihydro-1H-tetrazolo[1,5-a]pyrazin-6(5H)-one.

PHP618  
PROTON CDCl3 (C:\NMR data\DD) Patil 2

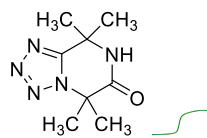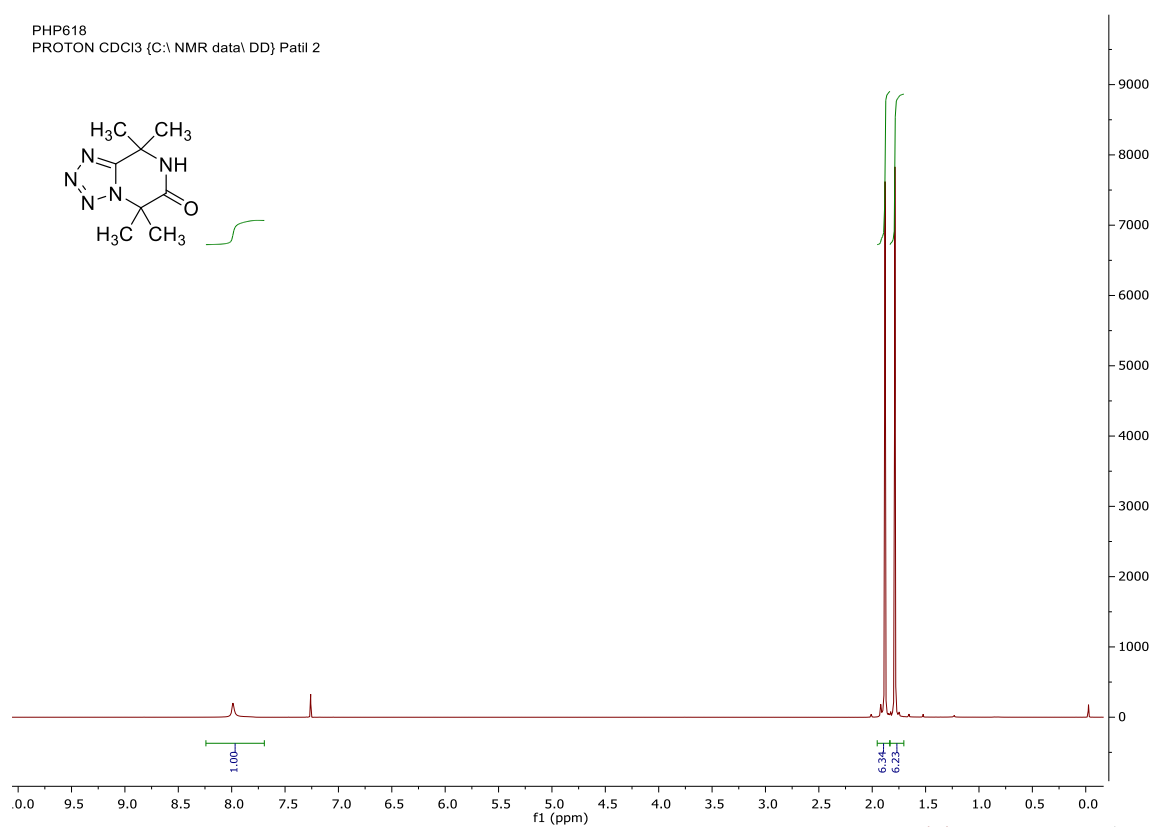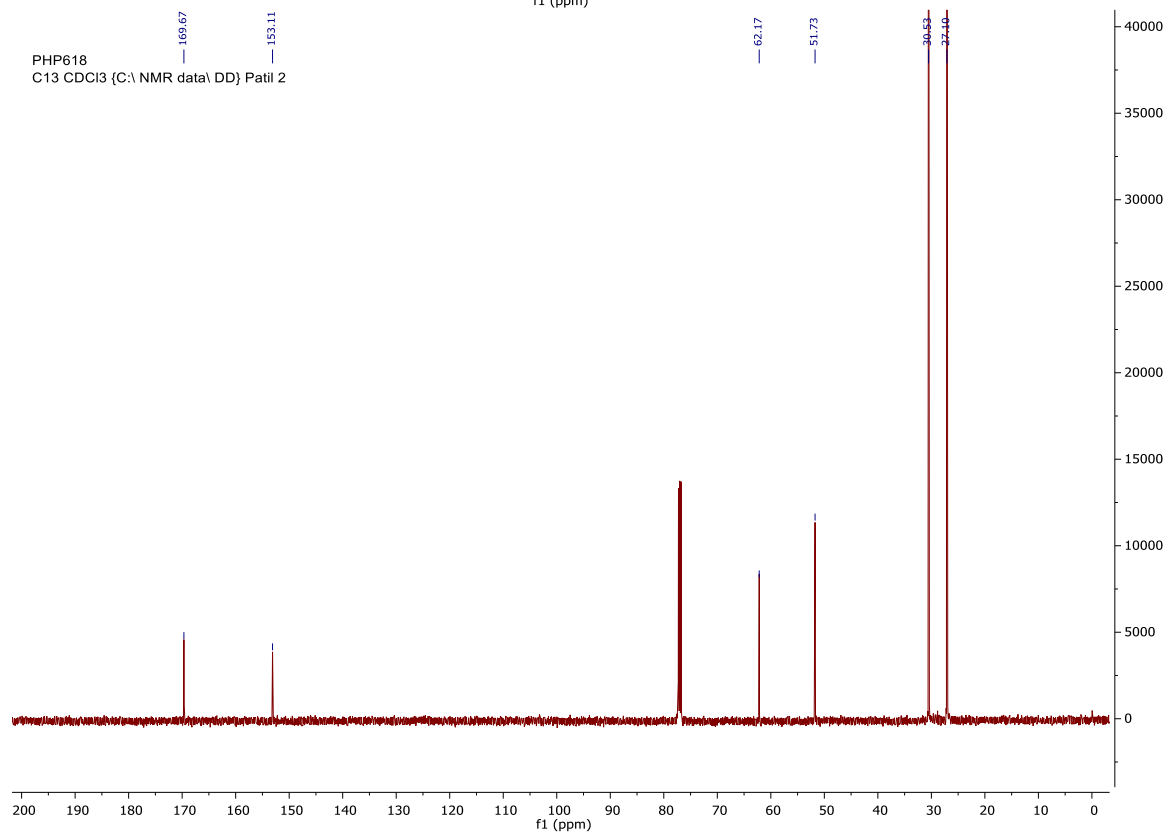

PHP618\_1\_Col4\_Sol1\_5-30%\_6min

PHP618\_1

3: Diode Array  
Range: 2.268

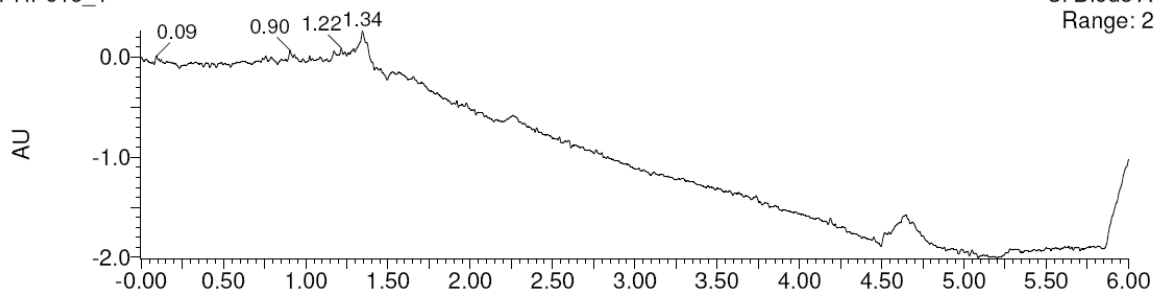

PHP618\_1

1: Scan ES+  
196  
2.92e6

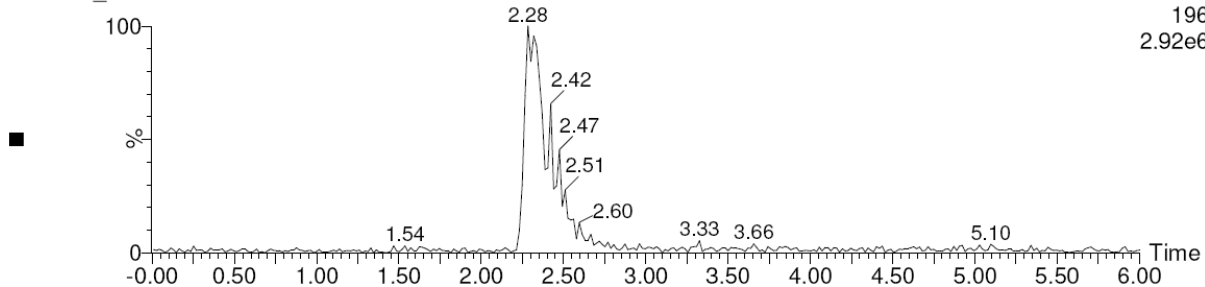

PHP618\_1\_Col4\_Sol1\_5-30%\_6min

PHP618\_1 134 (2.318)

1: Scan ES+  
2.79e6

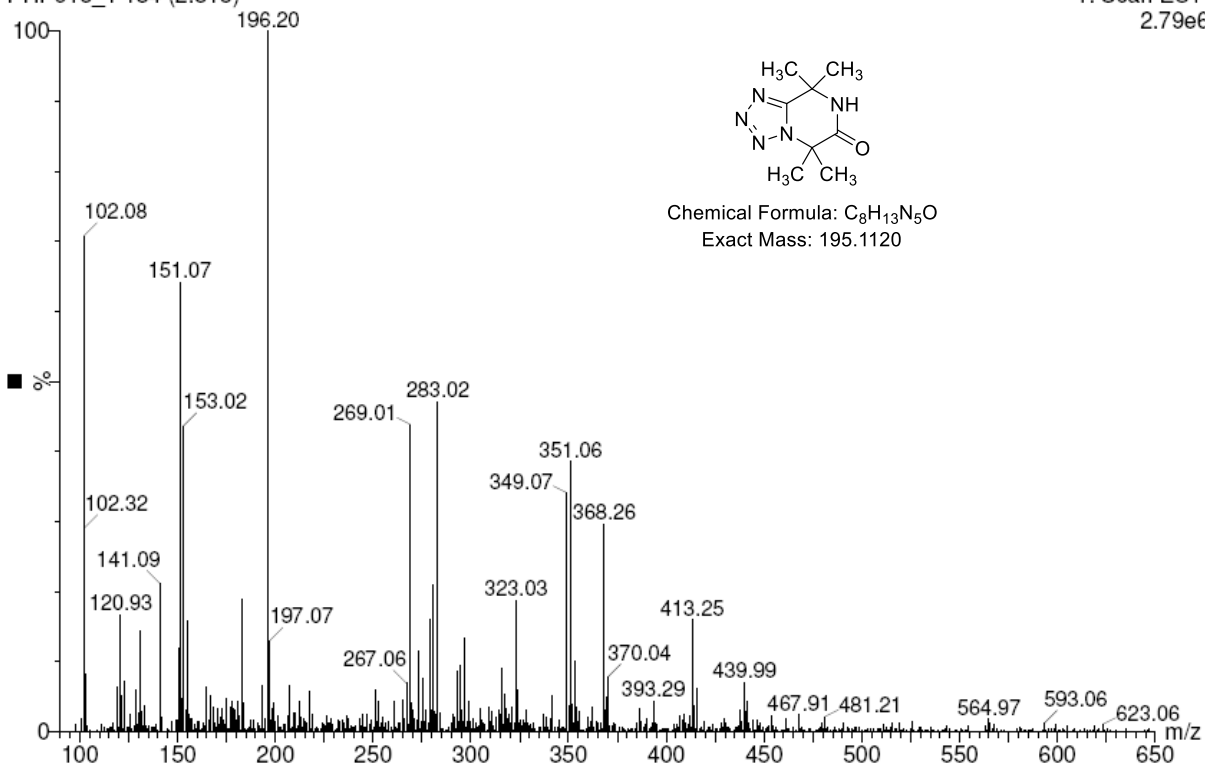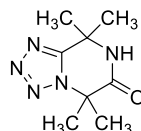

Chemical Formula: C<sub>8</sub>H<sub>13</sub>N<sub>5</sub>O  
Exact Mass: 195.1120

# 14c: 8-ethyl-5,5,8-trimethyl-7,8-dihydro-tetrazolo[1,5-a]pyrazin-6(5H)-one

PHP623  
PROTON CDCl3 (C:\NMR data\DD) Patil 6

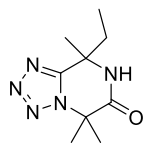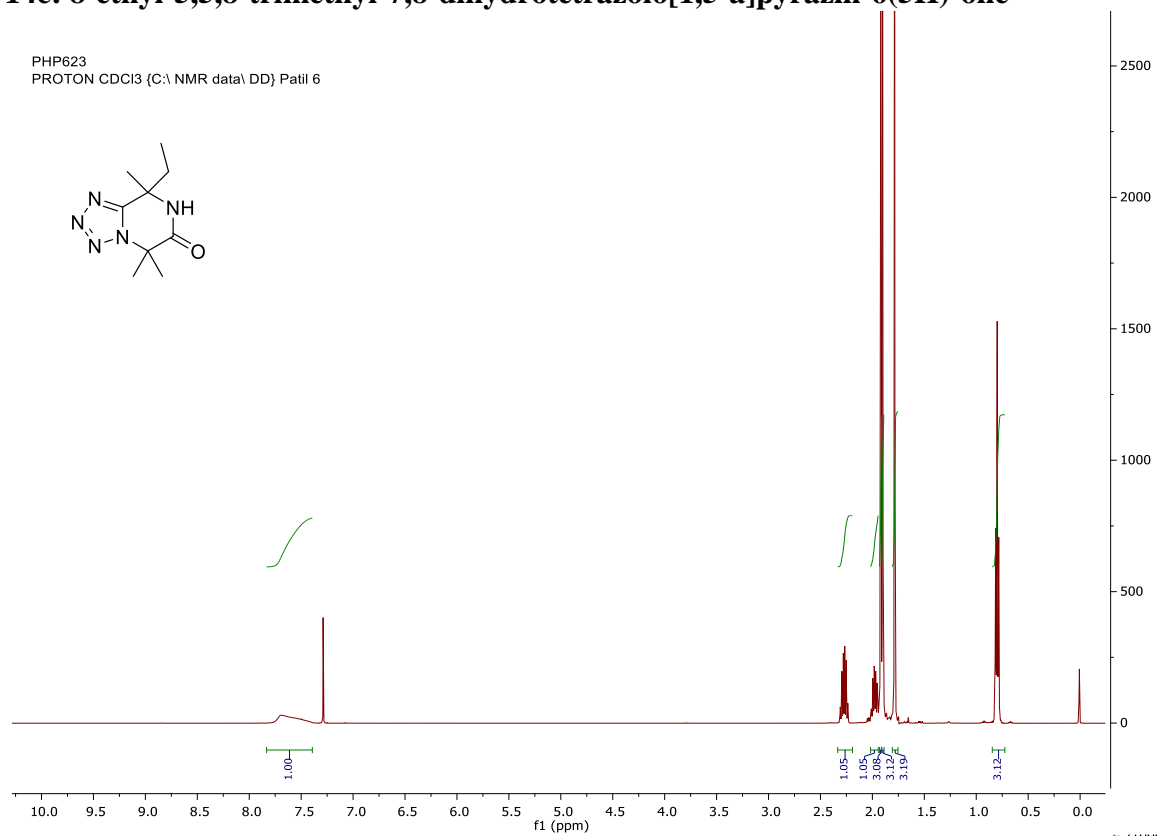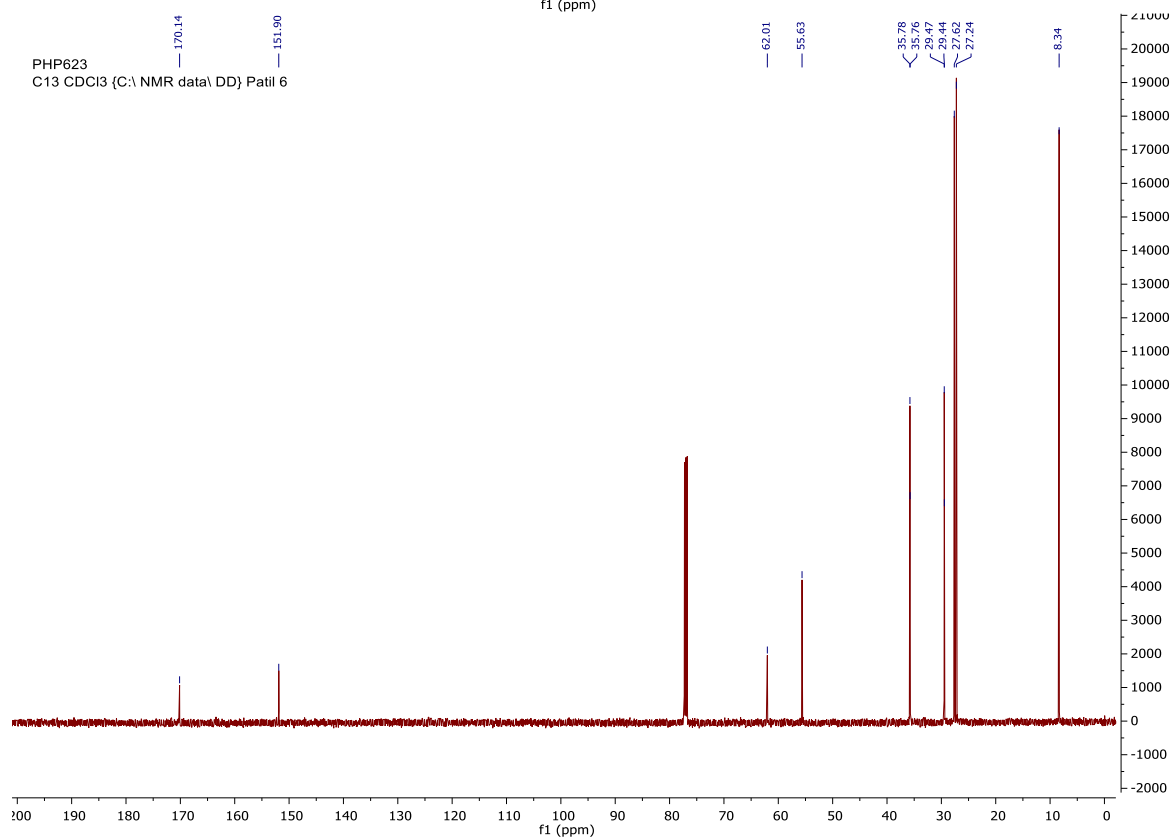

PHP623\_1\_Col4\_Sol1\_5-30%\_6min

PHP623\_1

3: Diode Array  
Range: 2.336

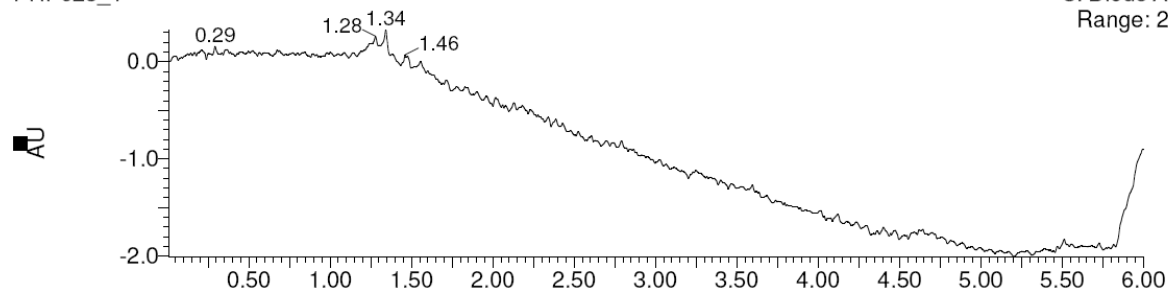

PHP623\_1

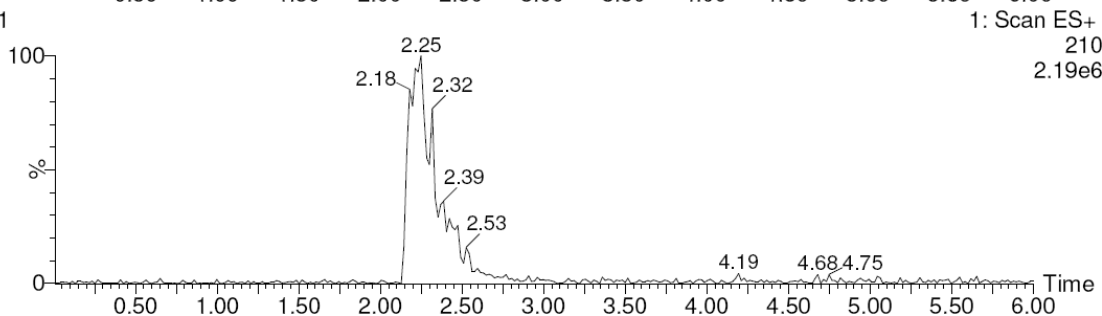

1: Scan ES+  
210  
2.19e6

PHP623\_1\_Col4\_Sol1\_5-30%\_6min

PHP623\_1 129 (2.231)

1: Scan ES+  
2.04e6

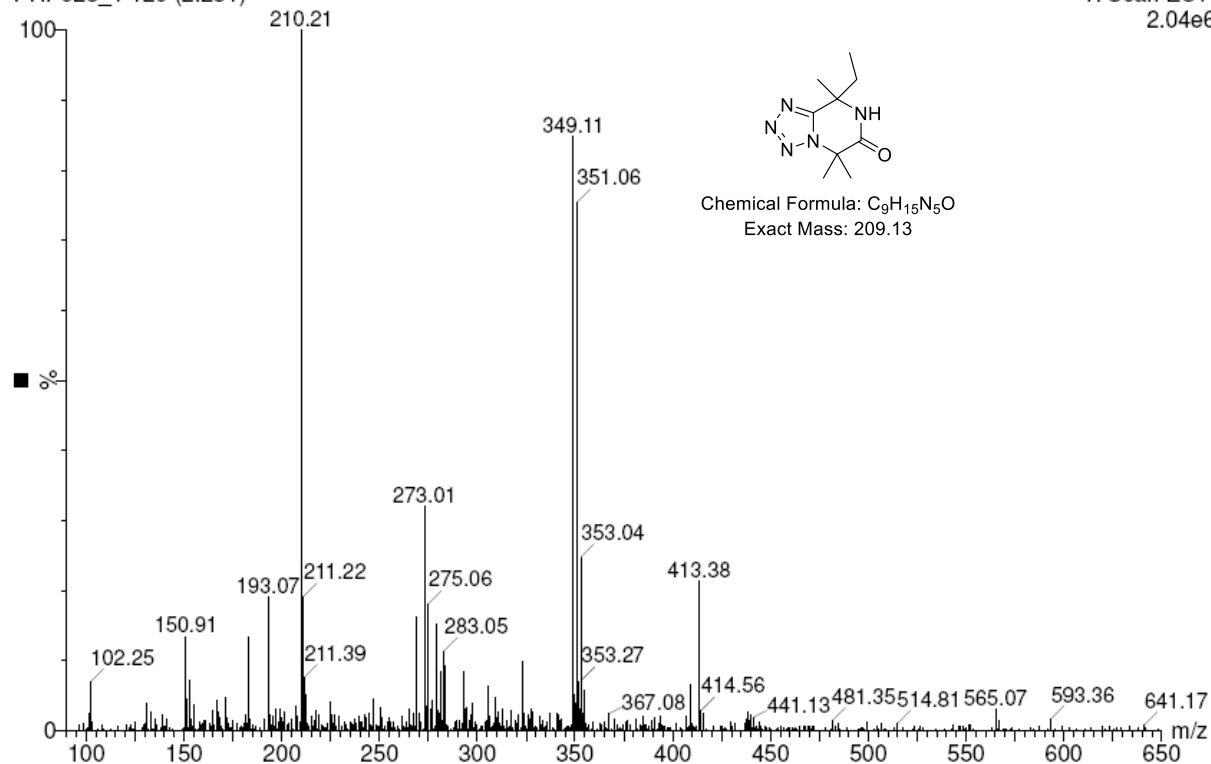

# 15c: 8-isobutyl-5,5,8-trimethyl-7,8-dihydro-1,5-a-pyrazin-6(5H)-one

PHP622  
PROTON CDCl3 {C:\NMR data\DD} Patil 5

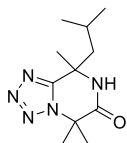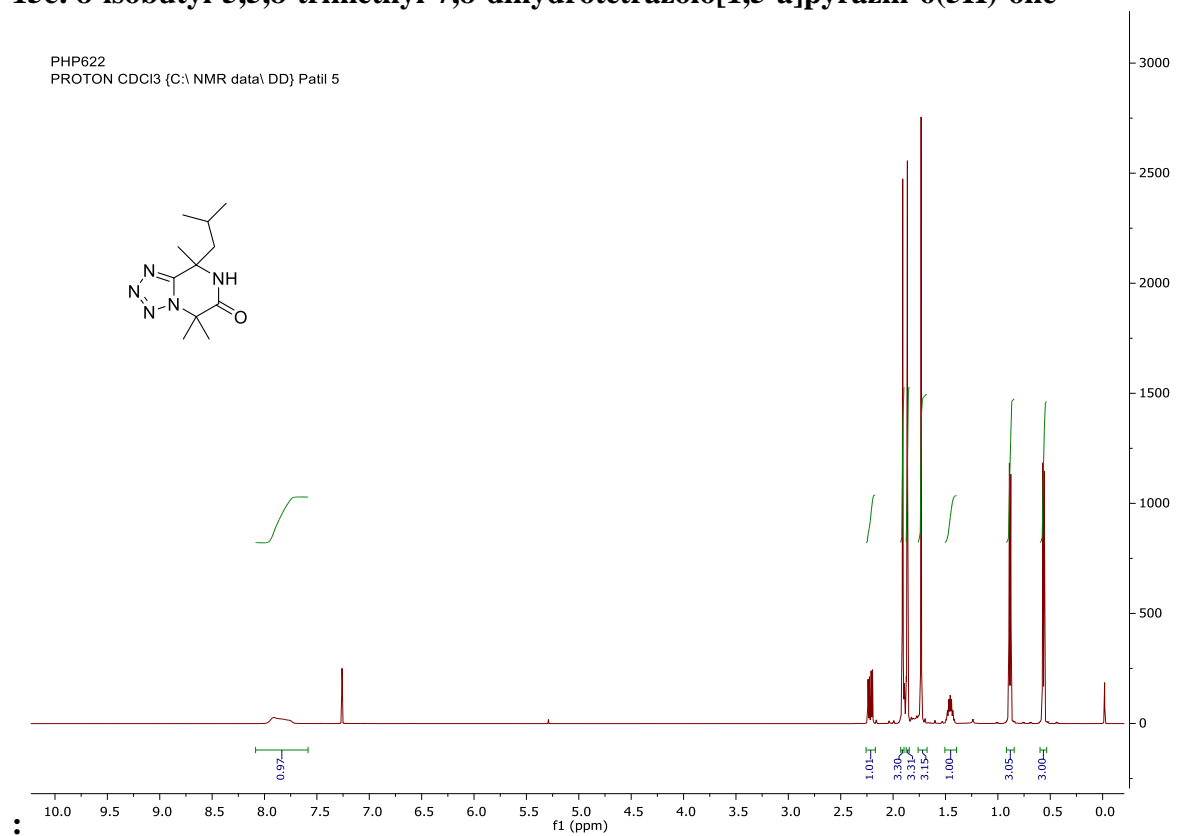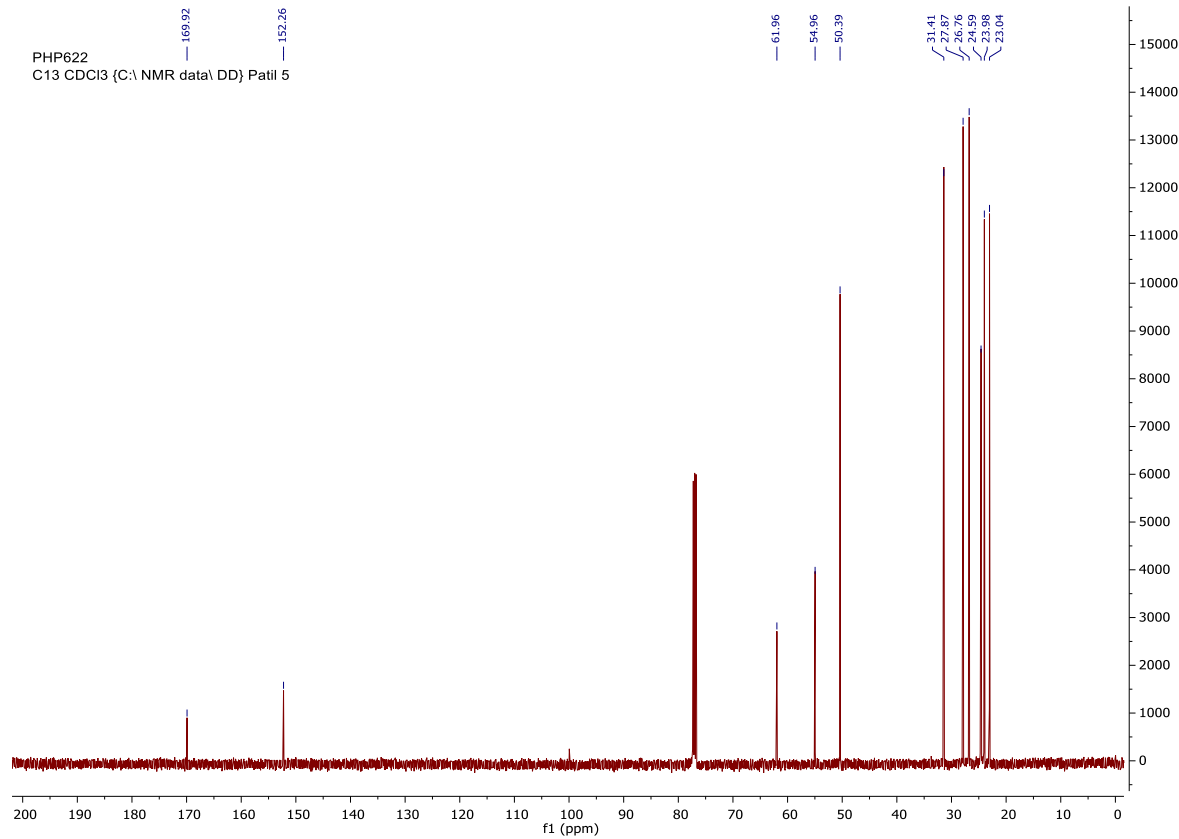



PHP622\_2\_Col4\_Sol1\_5-30%\_6min  
PHP622\_2

3: Diode Array  
Range: 2.316

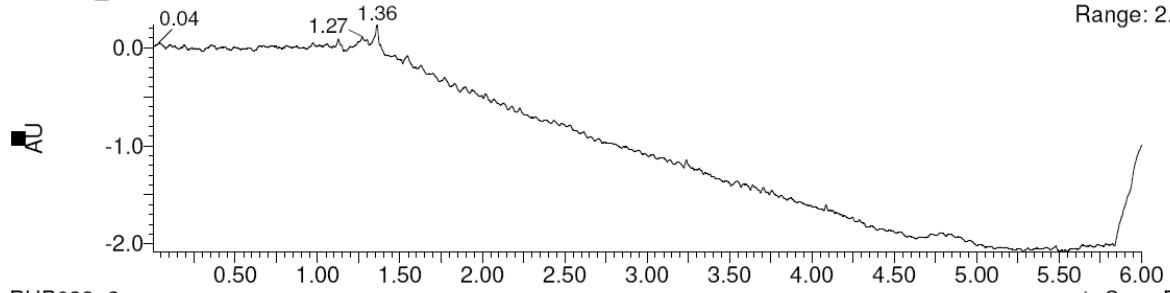

PHP622\_2

1: Scan ES+  
238  
8.59e5

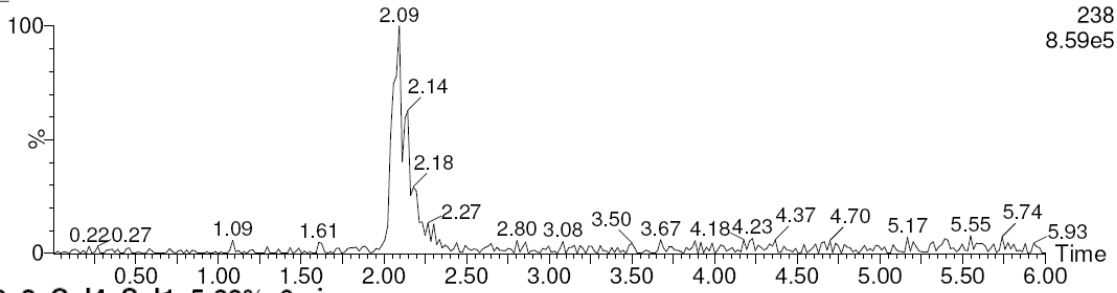

PHP622\_2\_Col4\_Sol1\_5-30%\_6min  
PHP622\_2 119 (2.058)

1: Scan ES+  
1.34e6

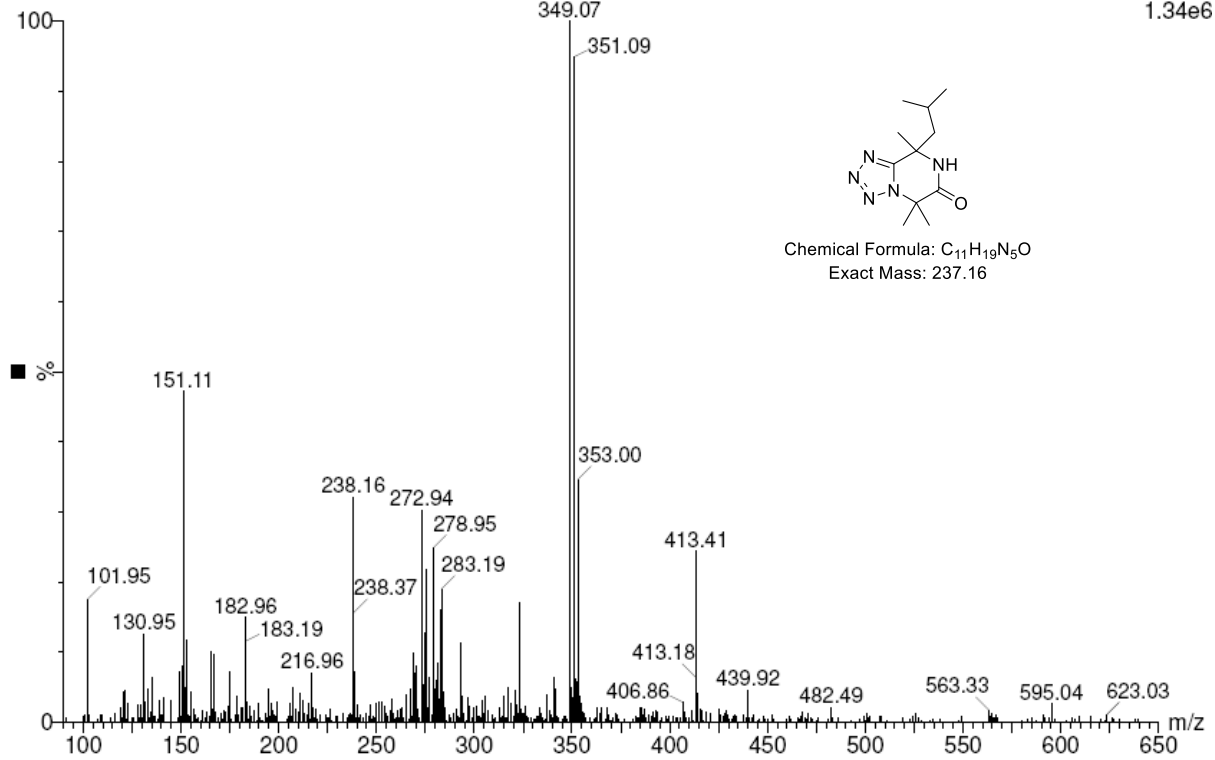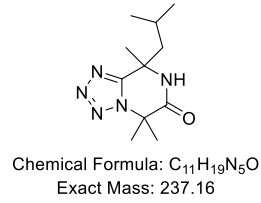

# 16c: 8,8-diethyl-5,5-dimethyl-7,8-dihydro-1,5-bis(1H)-pyrazin-6(5H)-one

PHP619  
PROTON CDCI3 (C:\NMR data\ DD) Patil 4

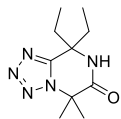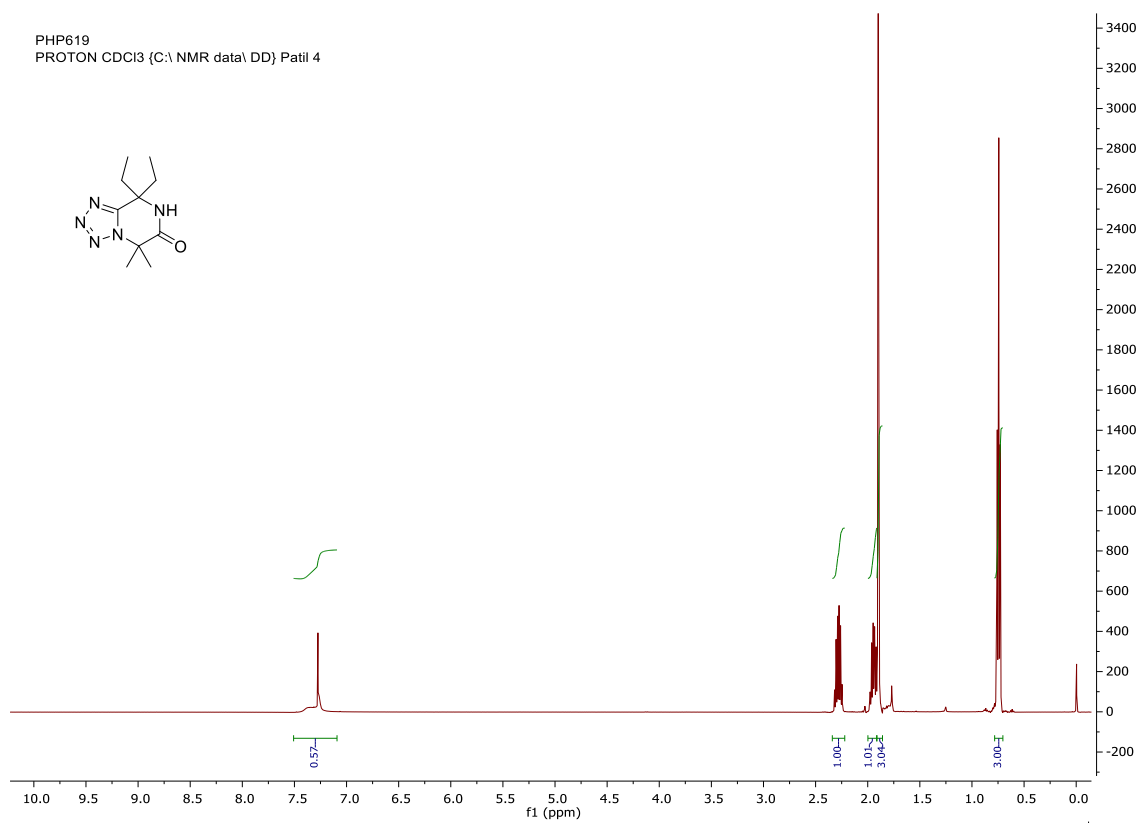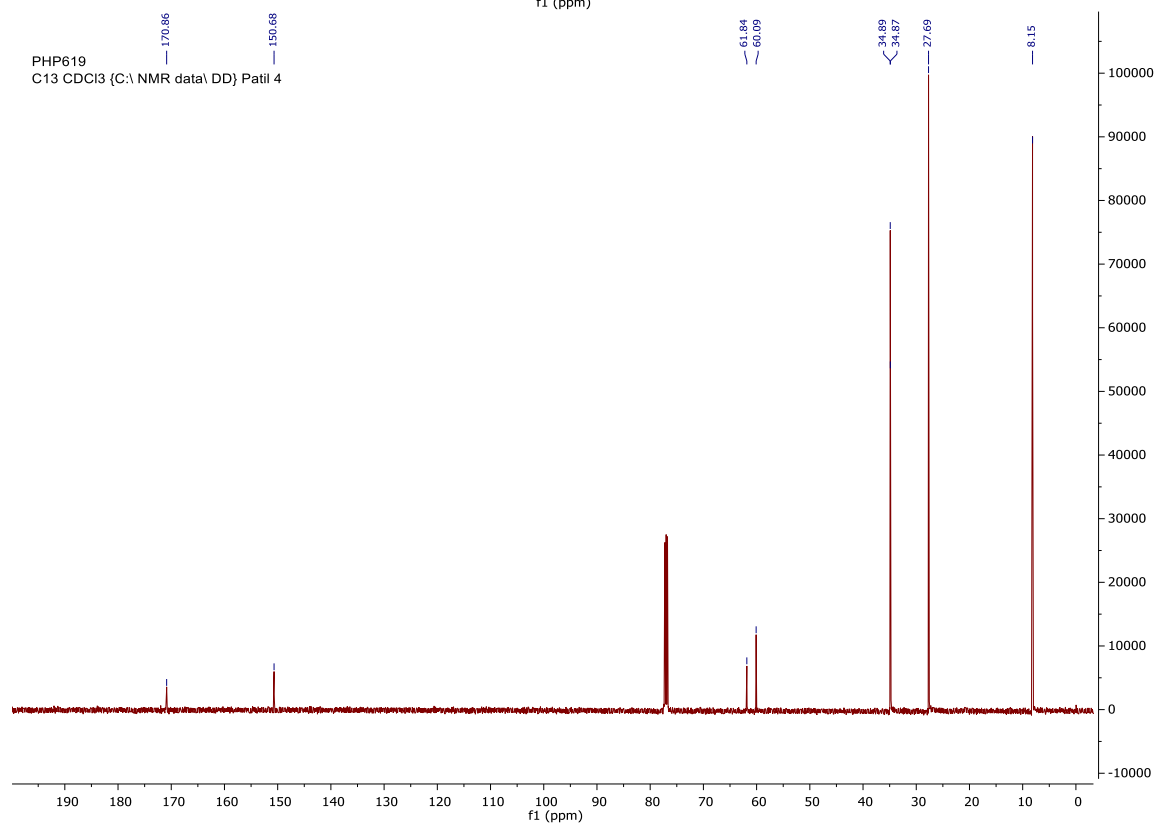

PHP619\_2\_Col4\_Sol1\_5-30%\_6min

PHP619\_2

3: Diode Array  
Range: 2.202

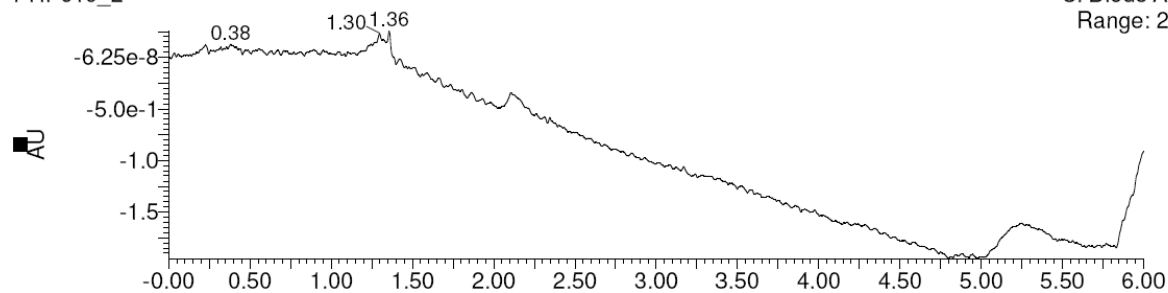

PHP619\_2

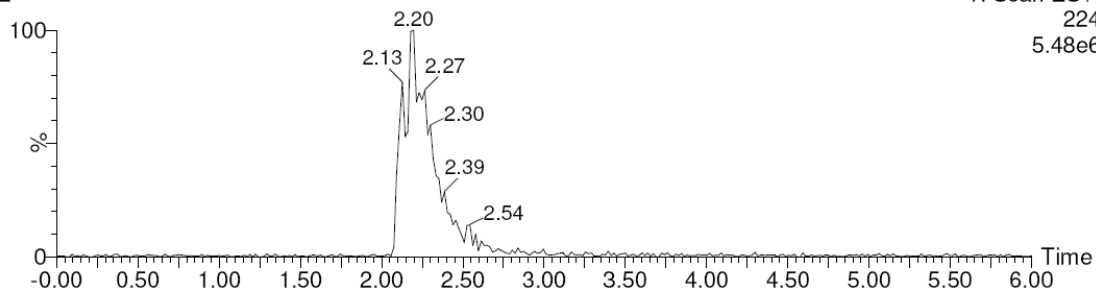

1: Scan ES+  
224  
5.48e6

PHP619\_2\_Col4\_Sol1\_5-30%\_6min

PHP619\_2 123 (2.127)

1: Scan ES+  
4.22e6

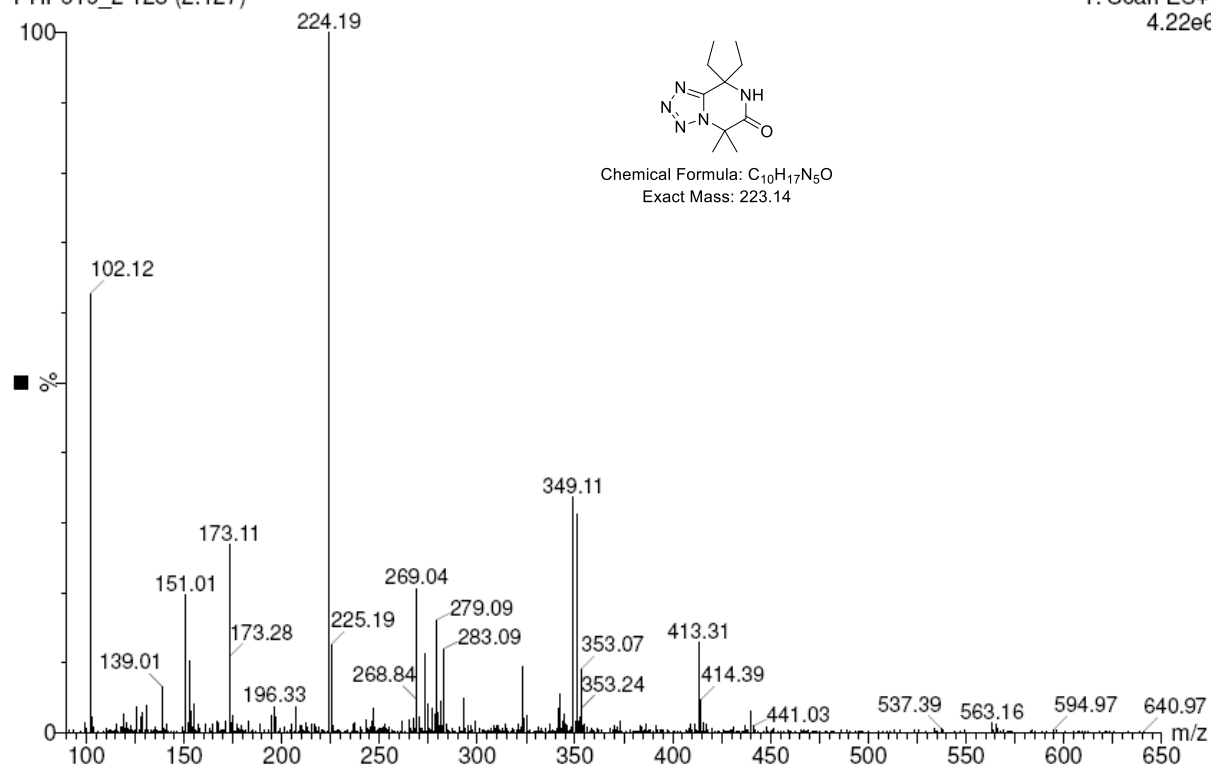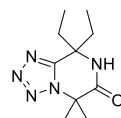

Chemical Formula: C<sub>10</sub>H<sub>17</sub>N<sub>5</sub>O  
Exact Mass: 223.14

# 23c: 5',5'-dimethyl-5'H-spiro[cyclopentane-1,8'-tetrazolo[1,5-a]pyrazin]-6'(7'H)-one

PHP620  
PROTON CDCl3 {C:\NMR data\ DD) Patil 3

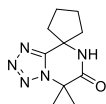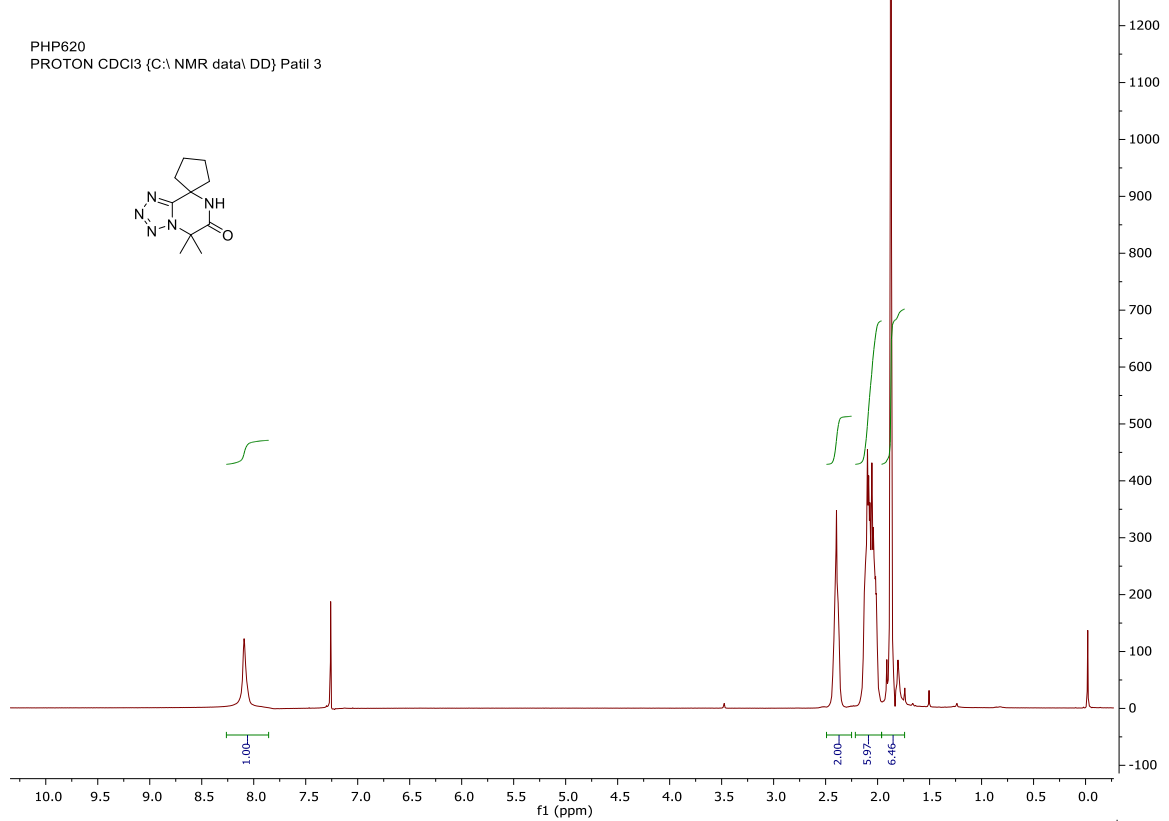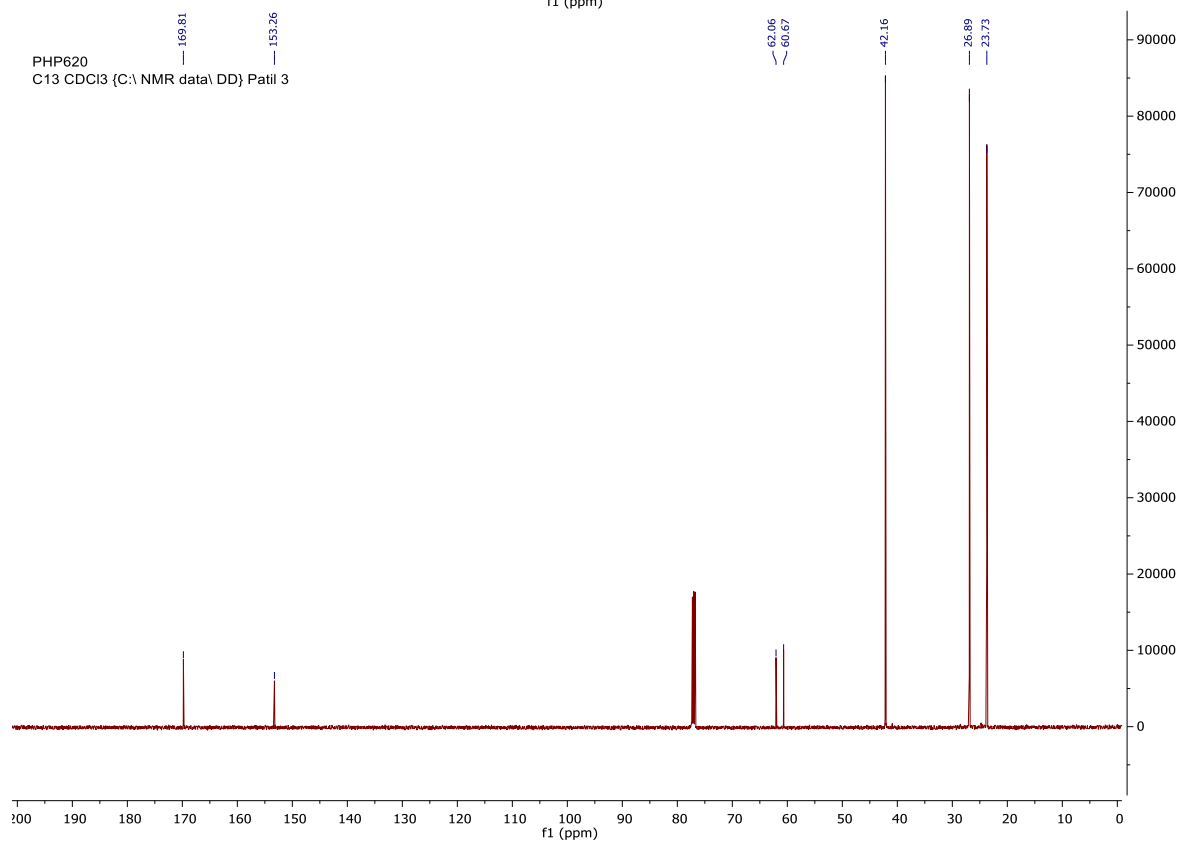

PHP620\_2\_Col4\_Sol1\_5-30%\_6min

PHP620\_2

3: Diode Array  
Range: 2.148

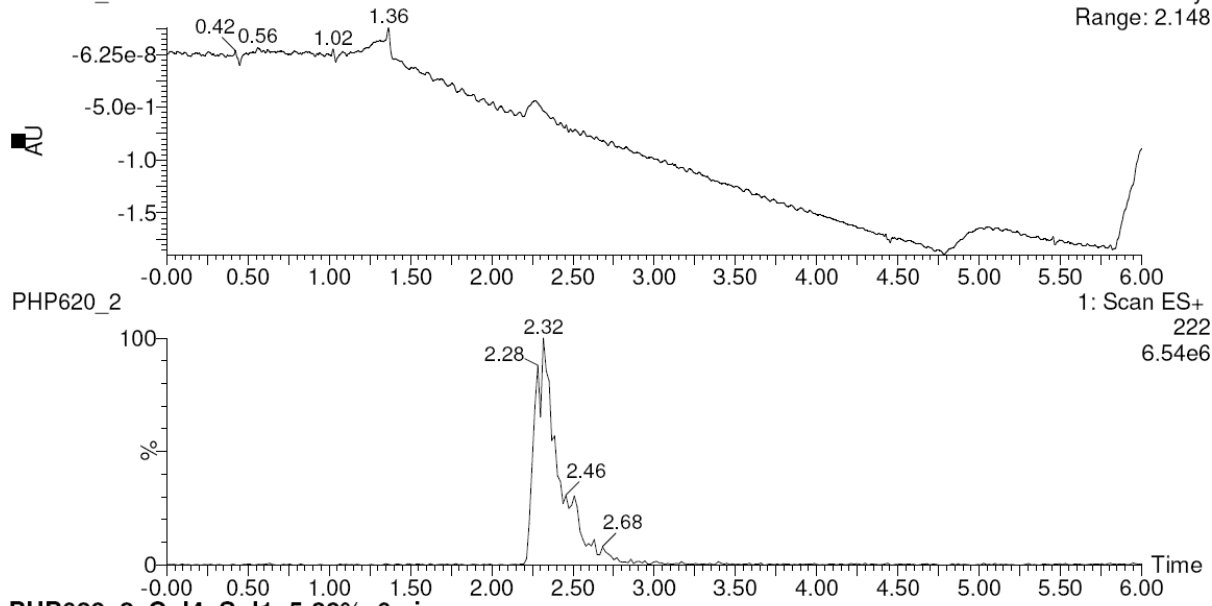

PHP620\_2\_Col4\_Sol1\_5-30%\_6min

PHP620\_2 134 (2.318)

1: Scan ES+  
6.54e6

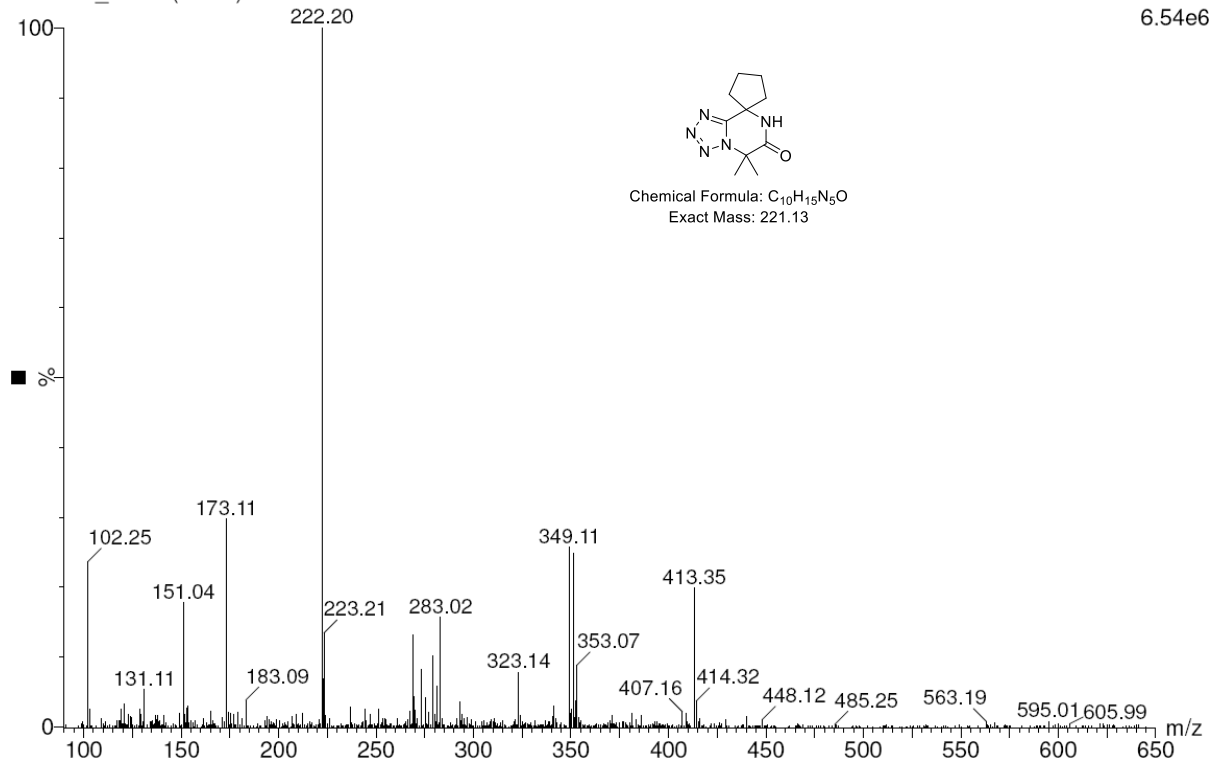

**24c: 2,2,5',5'-tetramethyl-5'H-spiro[cyclopentane-1,8'-tetrazolo[1,5-a]pyrazin]-6'(7'H)-one.**

PHP632  
PROTON CDCl3 (C:\NMR data\ DD) Patil 10

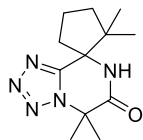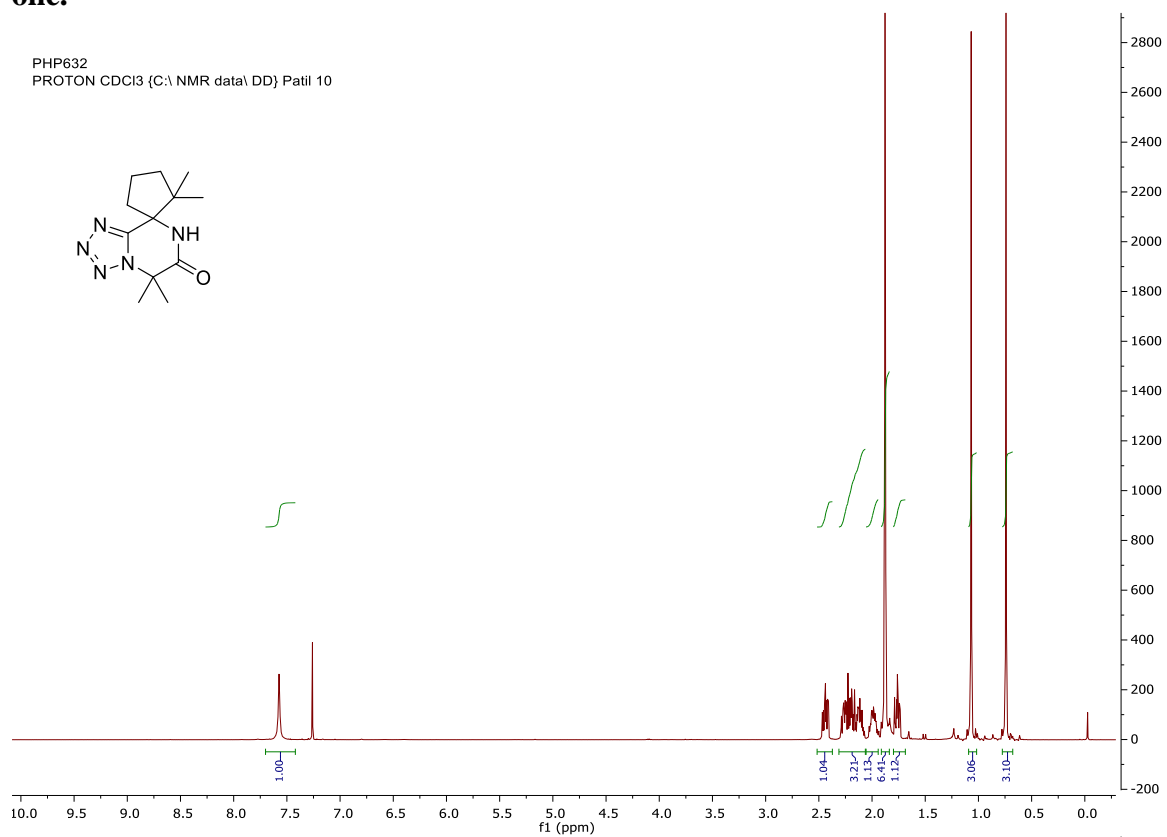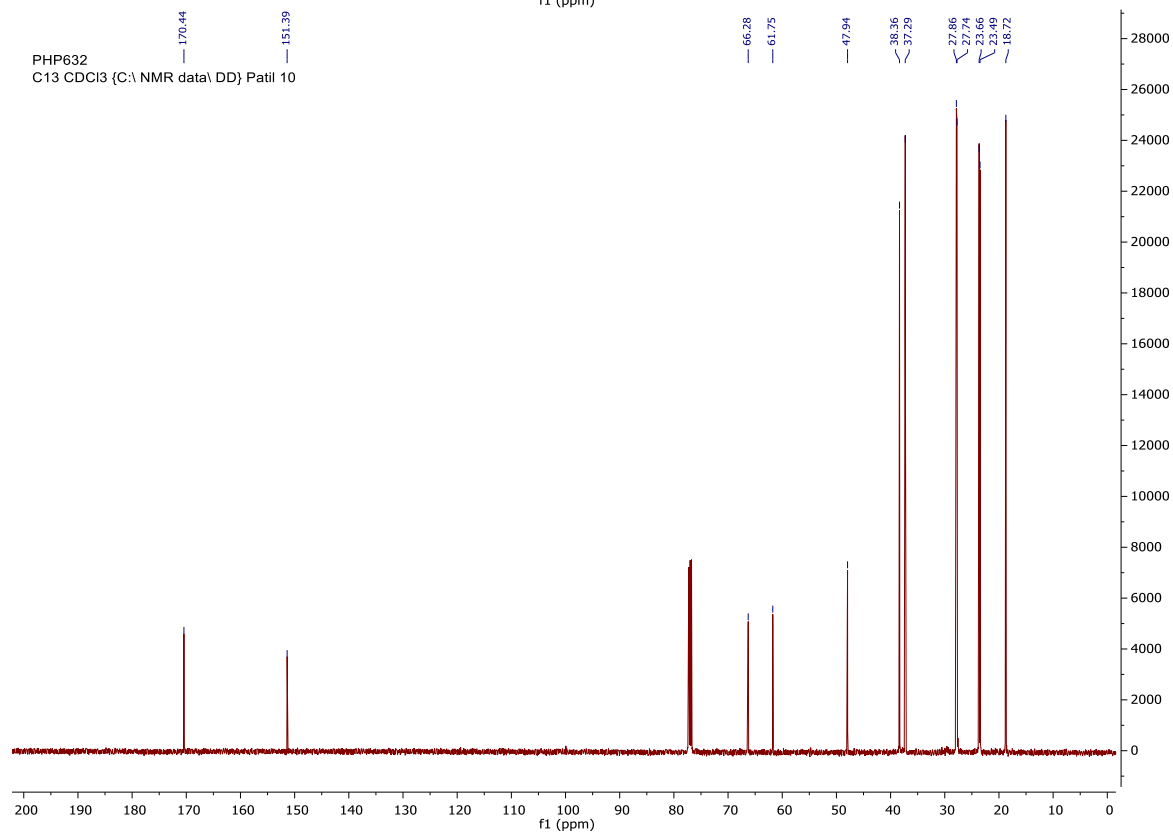

PHP632\_1\_Col3\_Sol1\_5-30%\_6min

PHP632\_1

3: Diode Array  
Range: 2.753

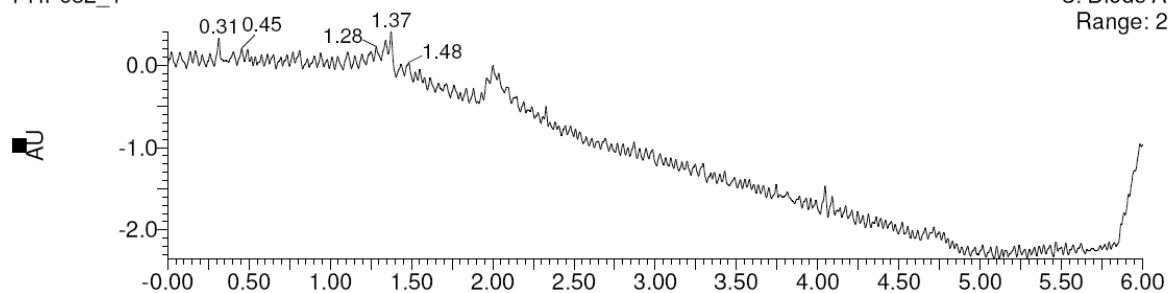

PHP632\_1

2: Scan ES-  
248  
1.36e6

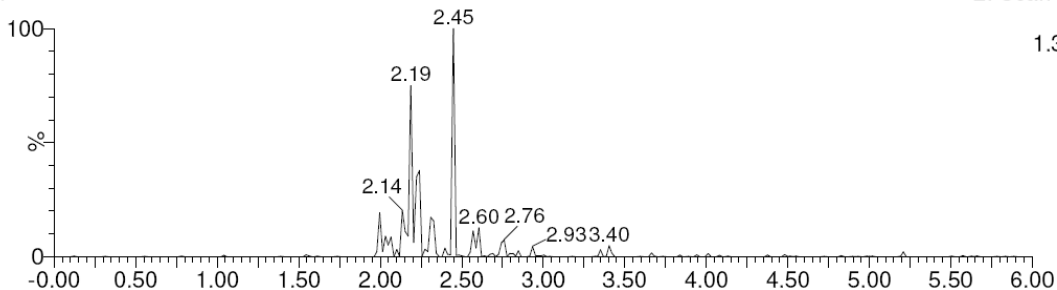

PHP632\_1\_Col3\_Sol1\_5-30%\_6min

PHP632\_1 126 (2.188)

2: Scan ES-  
1.02e6

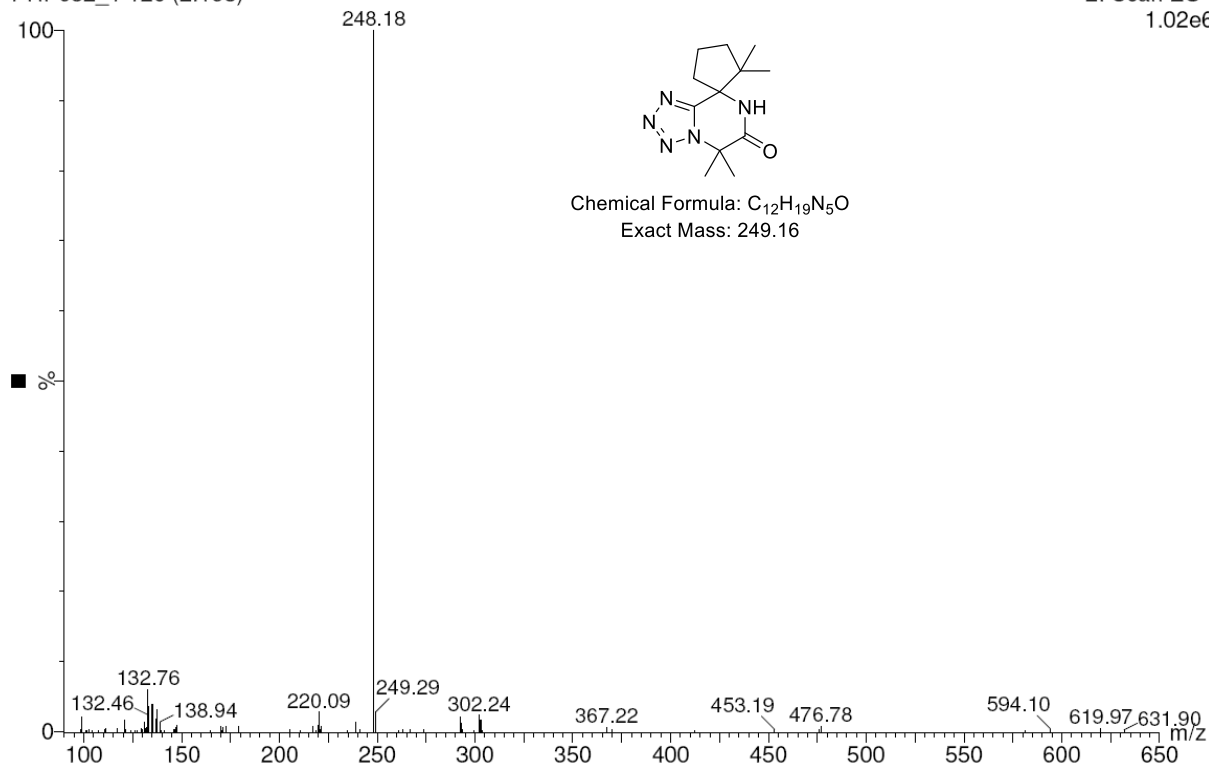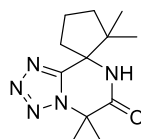

Chemical Formula: C<sub>12</sub>H<sub>19</sub>N<sub>5</sub>O  
Exact Mass: 249.16

**25c: methyl 5',5'-dimethyl-6'-oxo-6',7'-dihydro-5'H-spiro[cyclohexane-1,8'-tetrazolo[1,5-a]pyrazine]-2-carboxylate**

PHP631\_B/1  
 PHP631\_B  
 PROTON CDCl3 {C:\NMR data\DD} Patil 47

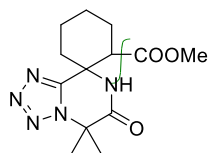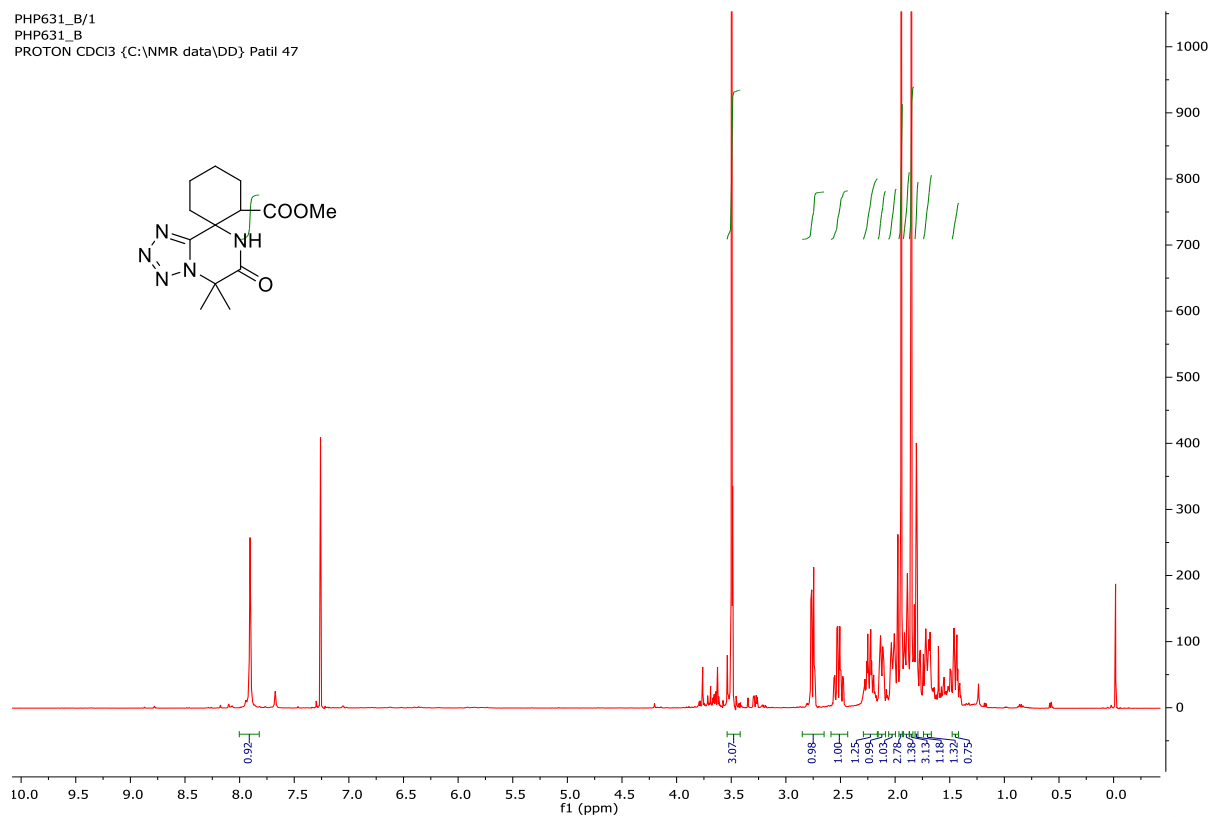

PHP631\_B/2  
 PHP631\_B  
 C13 CDCl3 {C:\NMR data\DD} Patil 16

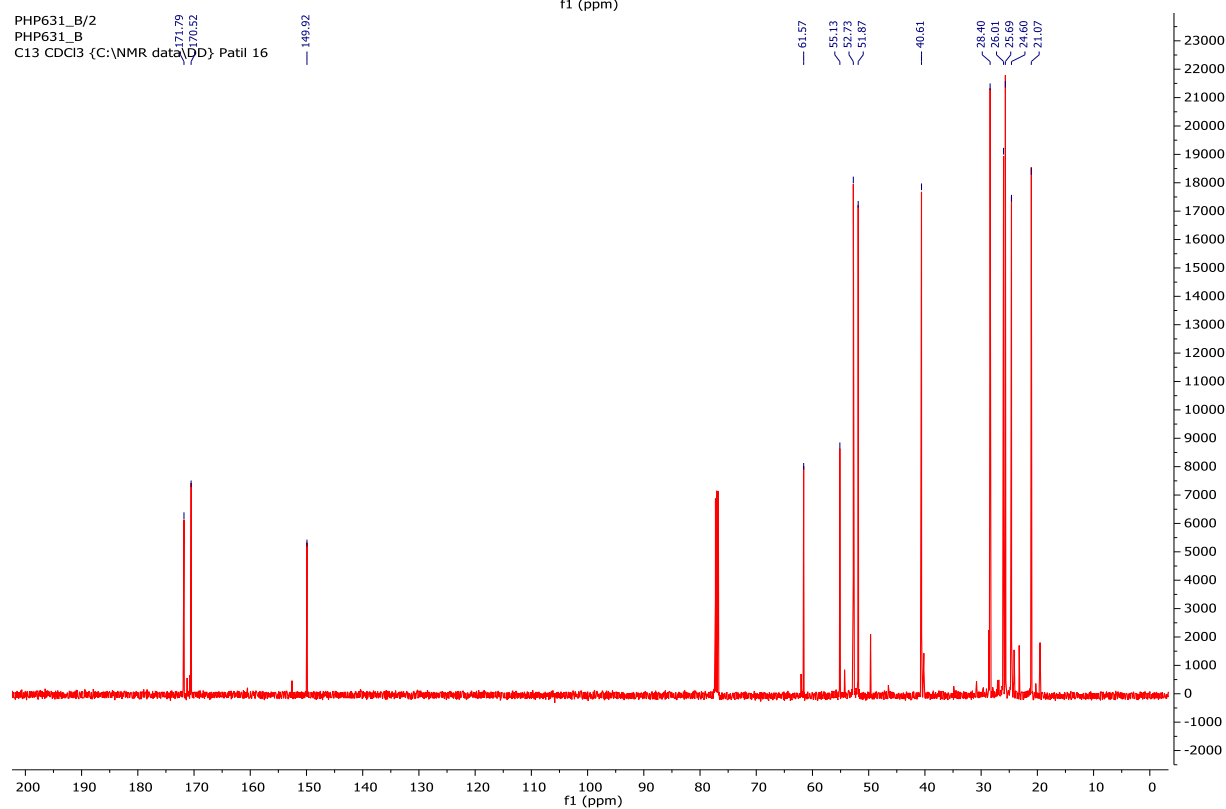



PHP631\_1\_Col3\_Sol1\_5-30%\_6min

PHP631\_1

3: Diode Array  
Range: 7.343e+1

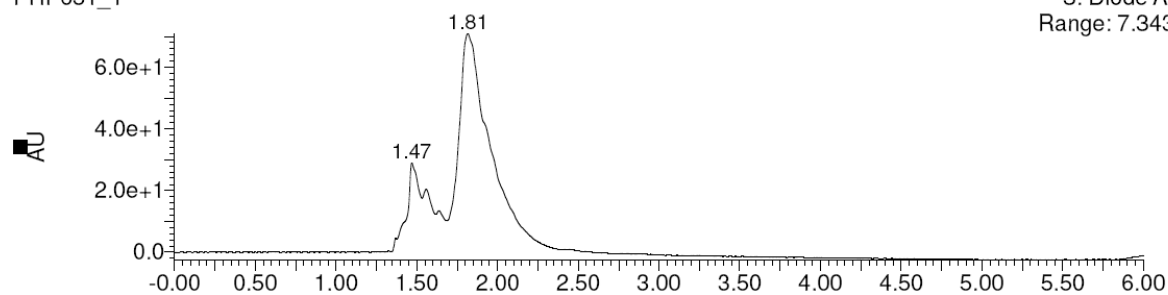

PHP631\_1

2: Scan ES-  
292  
5.58e6

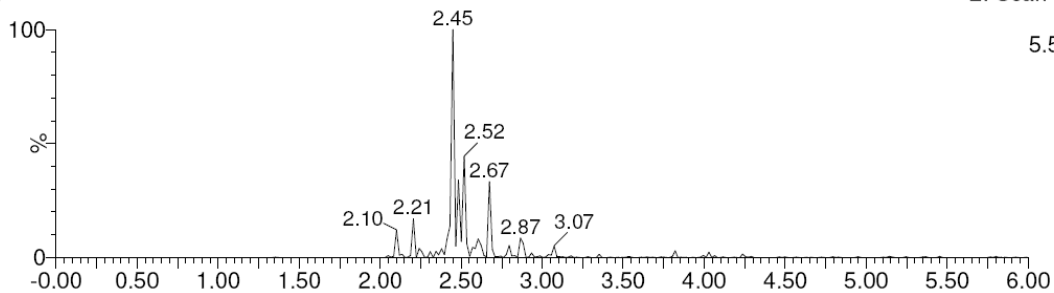

PHP631\_1\_Col3\_Sol1\_5-30%\_6min

PHP631\_1 141 (2.448)

2: Scan ES-  
5.58e6

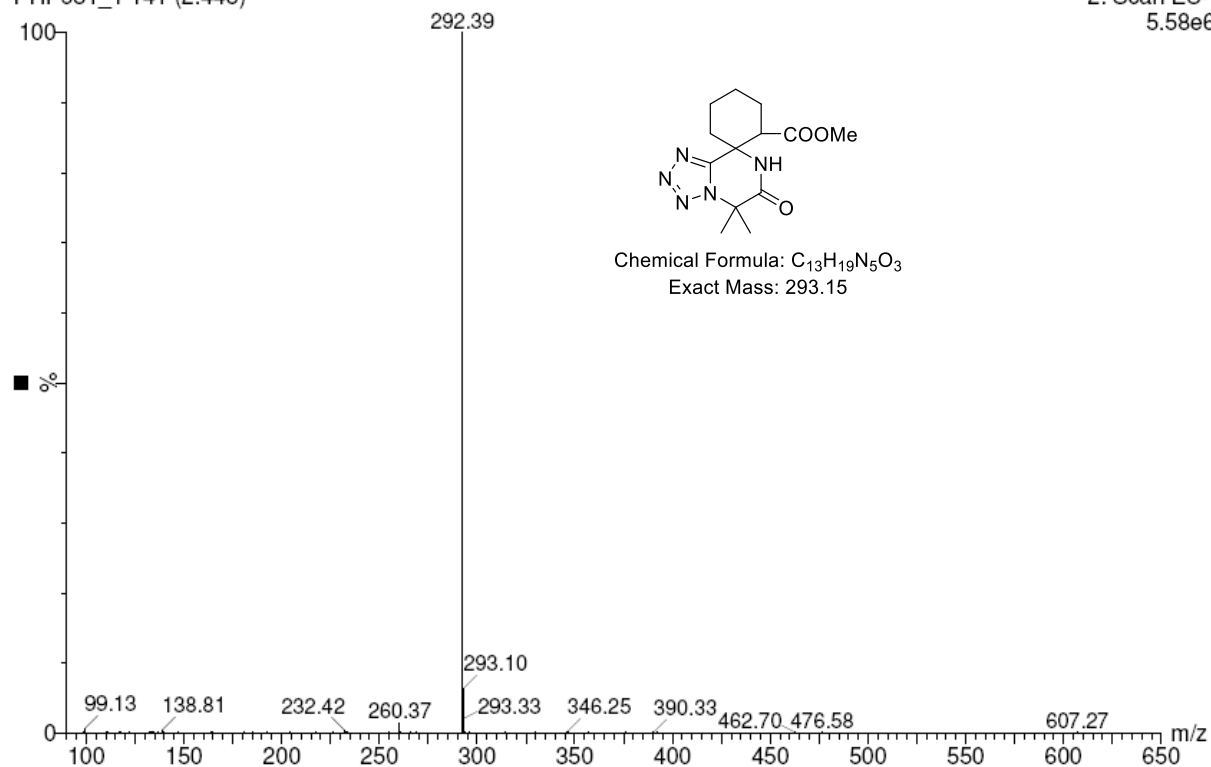

# 26c: 5',5'-dimethyl-5'H-spiro[cyclohexane-1,8'-tetrazolo[1,5-a]pyrazin]-6'(7'H)-one

PHP614  
PROTON CDCl3 (C:\NMR data\DD) Patil 4

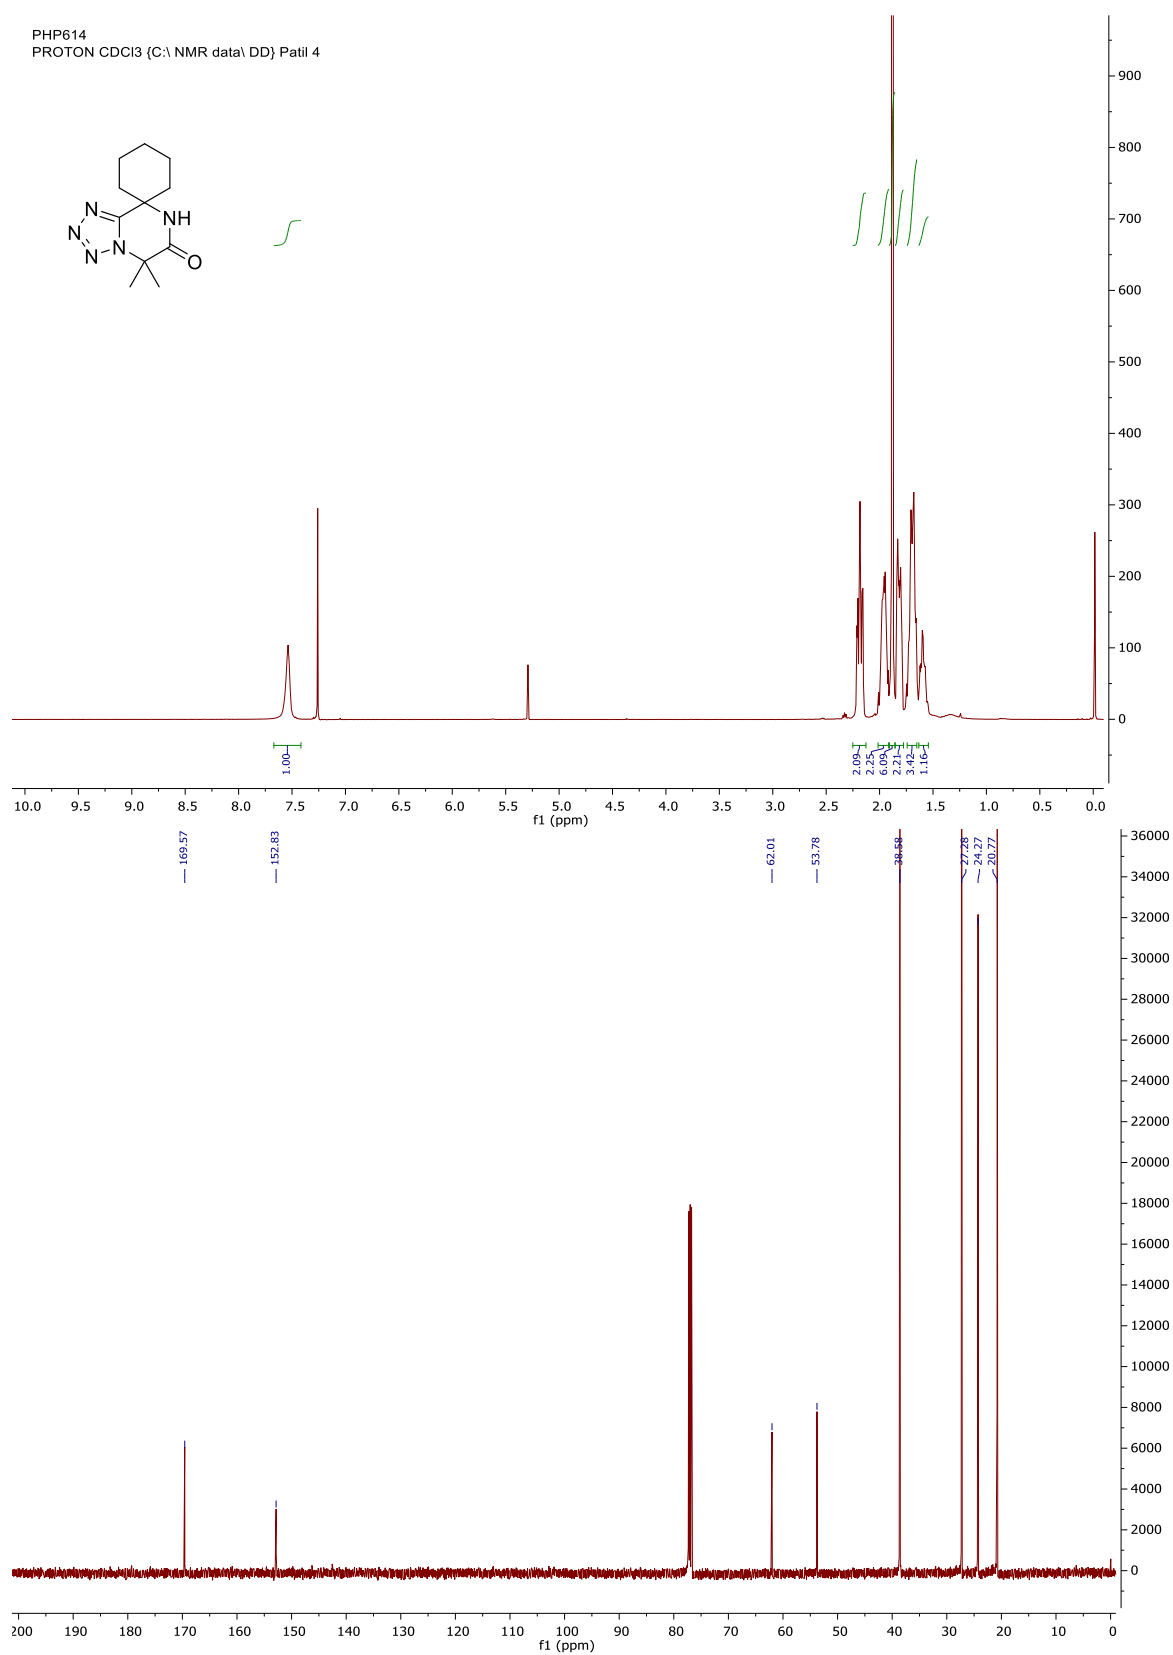

PHP614\_1\_Col4\_Sol1\_5-30%\_6min

PHP614\_1

3: Diode Array  
Range: 2.141

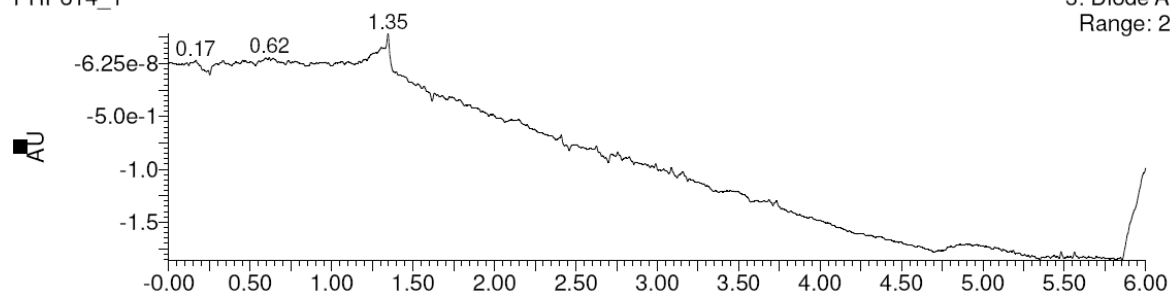

PHP614\_1

1: Scan ES+  
236  
4.99e6

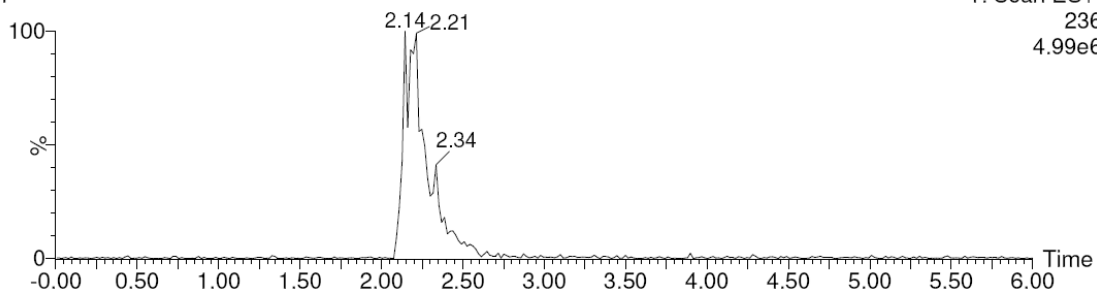

PHP614\_1\_Col4\_Sol1\_5-30%\_6min

PHP614\_1 126 (2.179)

1: Scan ES+  
4.58e6

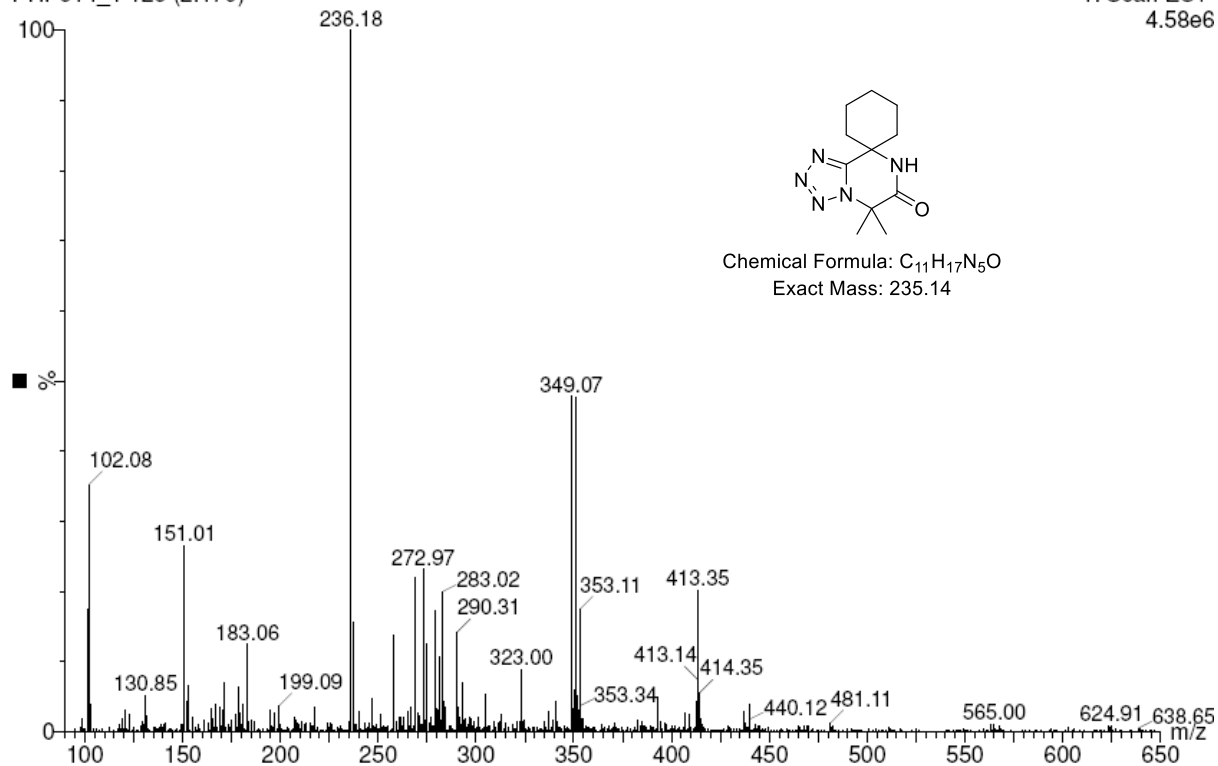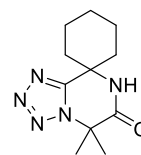

Chemical Formula: C<sub>11</sub>H<sub>17</sub>N<sub>5</sub>O  
Exact Mass: 235.14

**27c: 27c: 5',5'-dimethyl-4-phenyl-5'H-spiro[cyclohexane-1,8'-tetrazolo[1,5-a]pyrazin]-6'(7'H)-one**

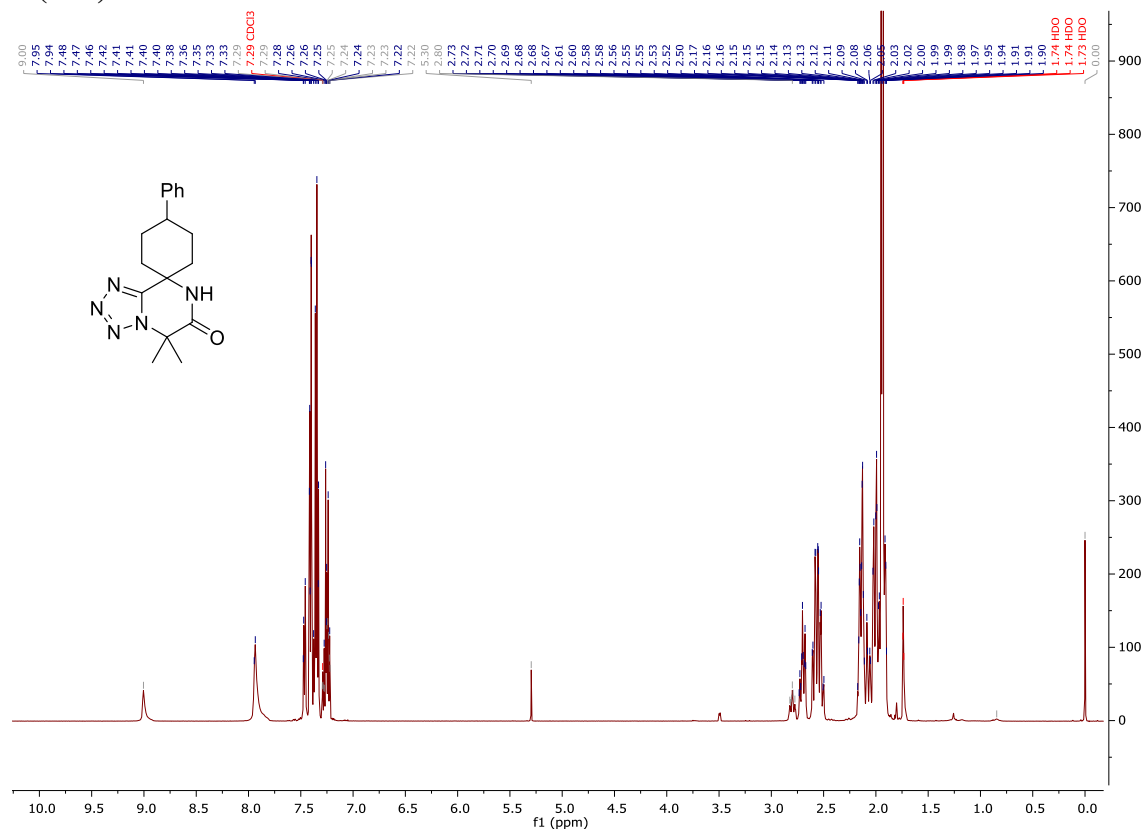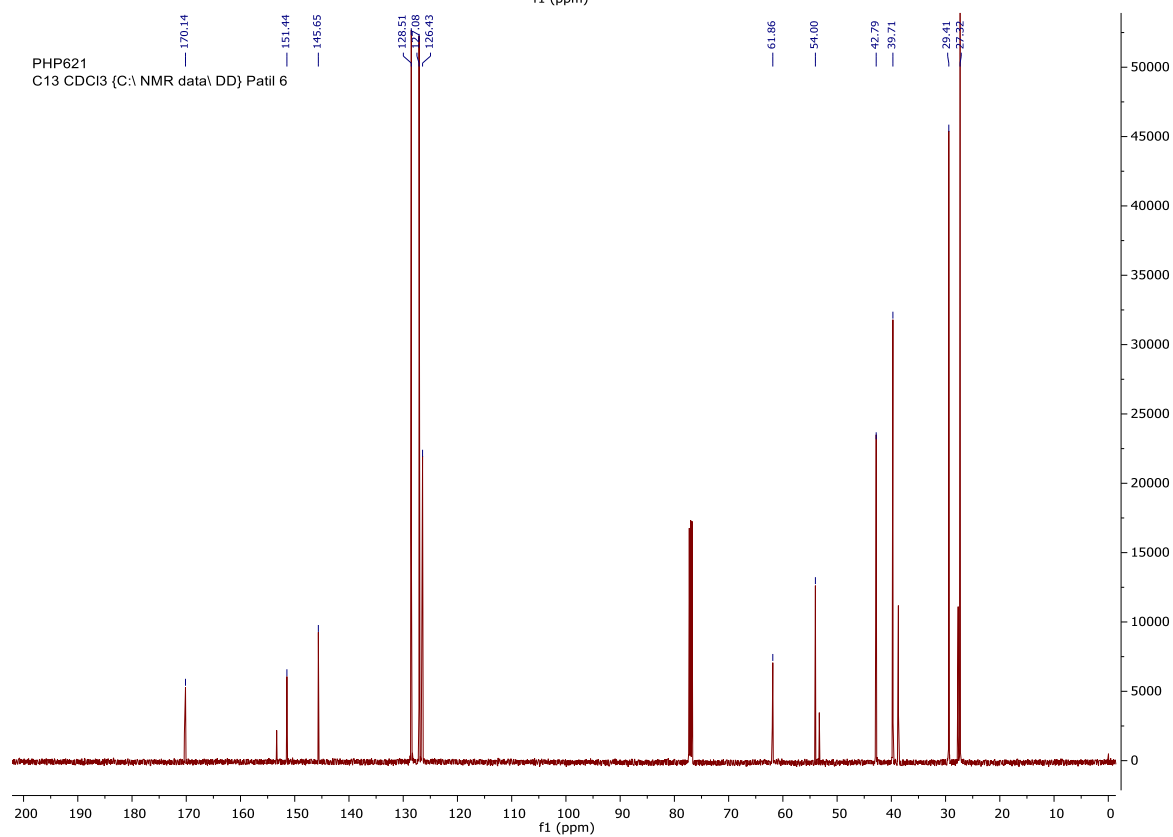

PHP621\_1\_Col4\_Sol1\_5-30%\_6min

PHP621\_1

3: Diode Array  
Range: 2.218

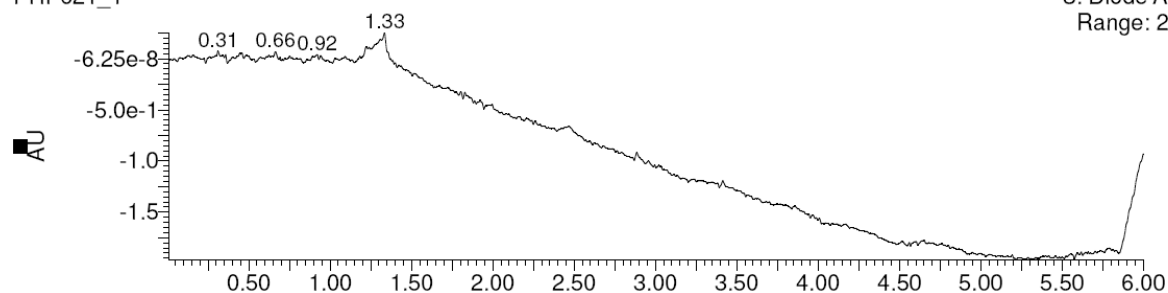

PHP621\_1

1: Scan ES+  
312  
1.30e6

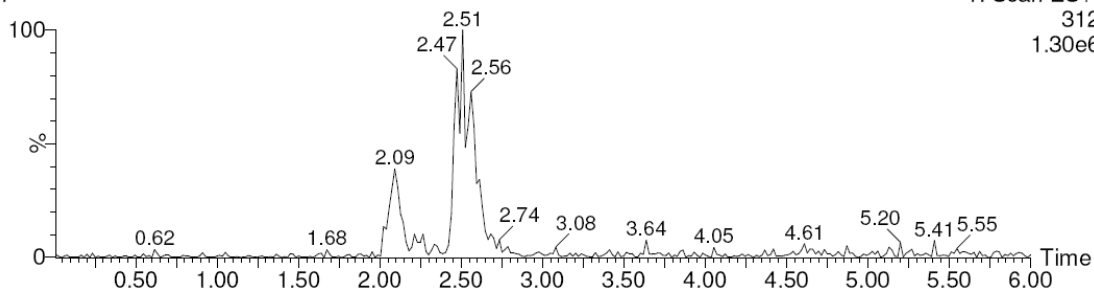

PHP621\_1\_Col4\_Sol1\_5-30%\_6min

PHP621\_1 143 (2.475)

1: Scan ES+  
2.47e6

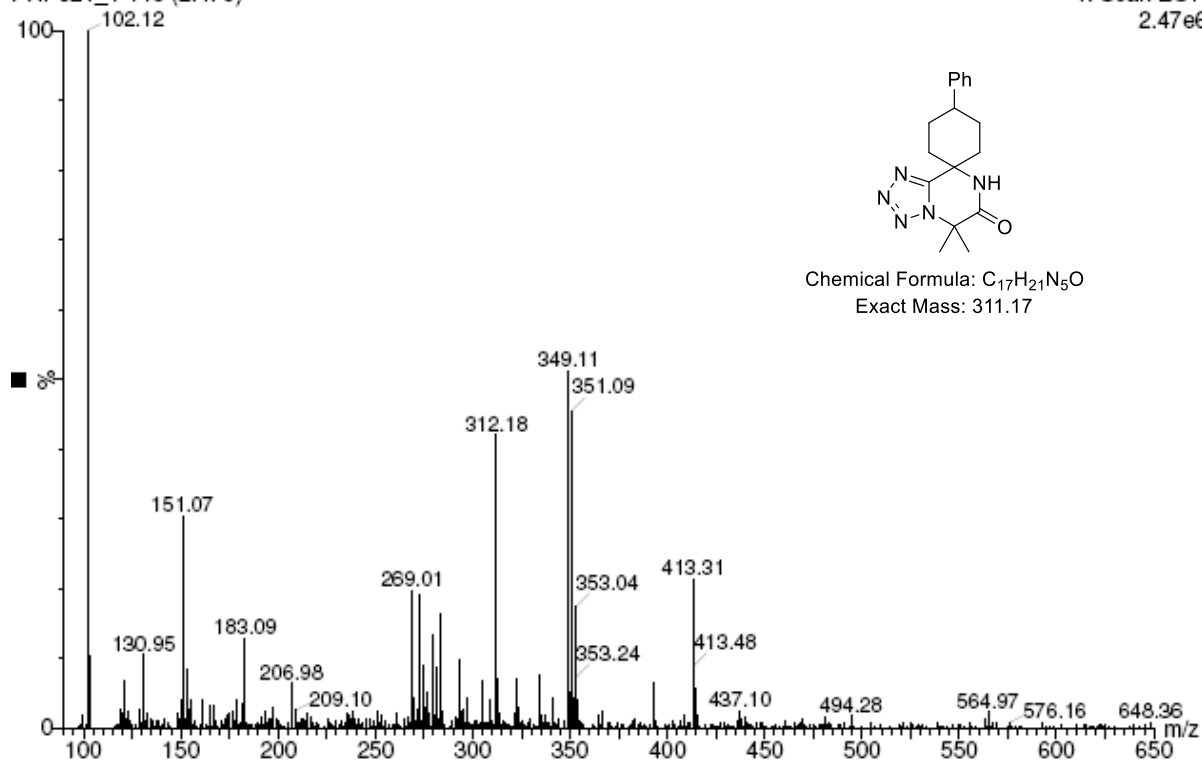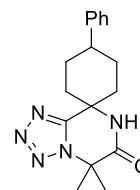

Chemical Formula: C<sub>17</sub>H<sub>21</sub>N<sub>5</sub>O  
Exact Mass: 311.17

# 28c: benzyl 5',5'-dimethyl-6'-oxo-6',7'-dihydro-5'H-spiro[piperidine-4,8'-tetrazolo[1,5-a]pyrazine]-1-carboxylate

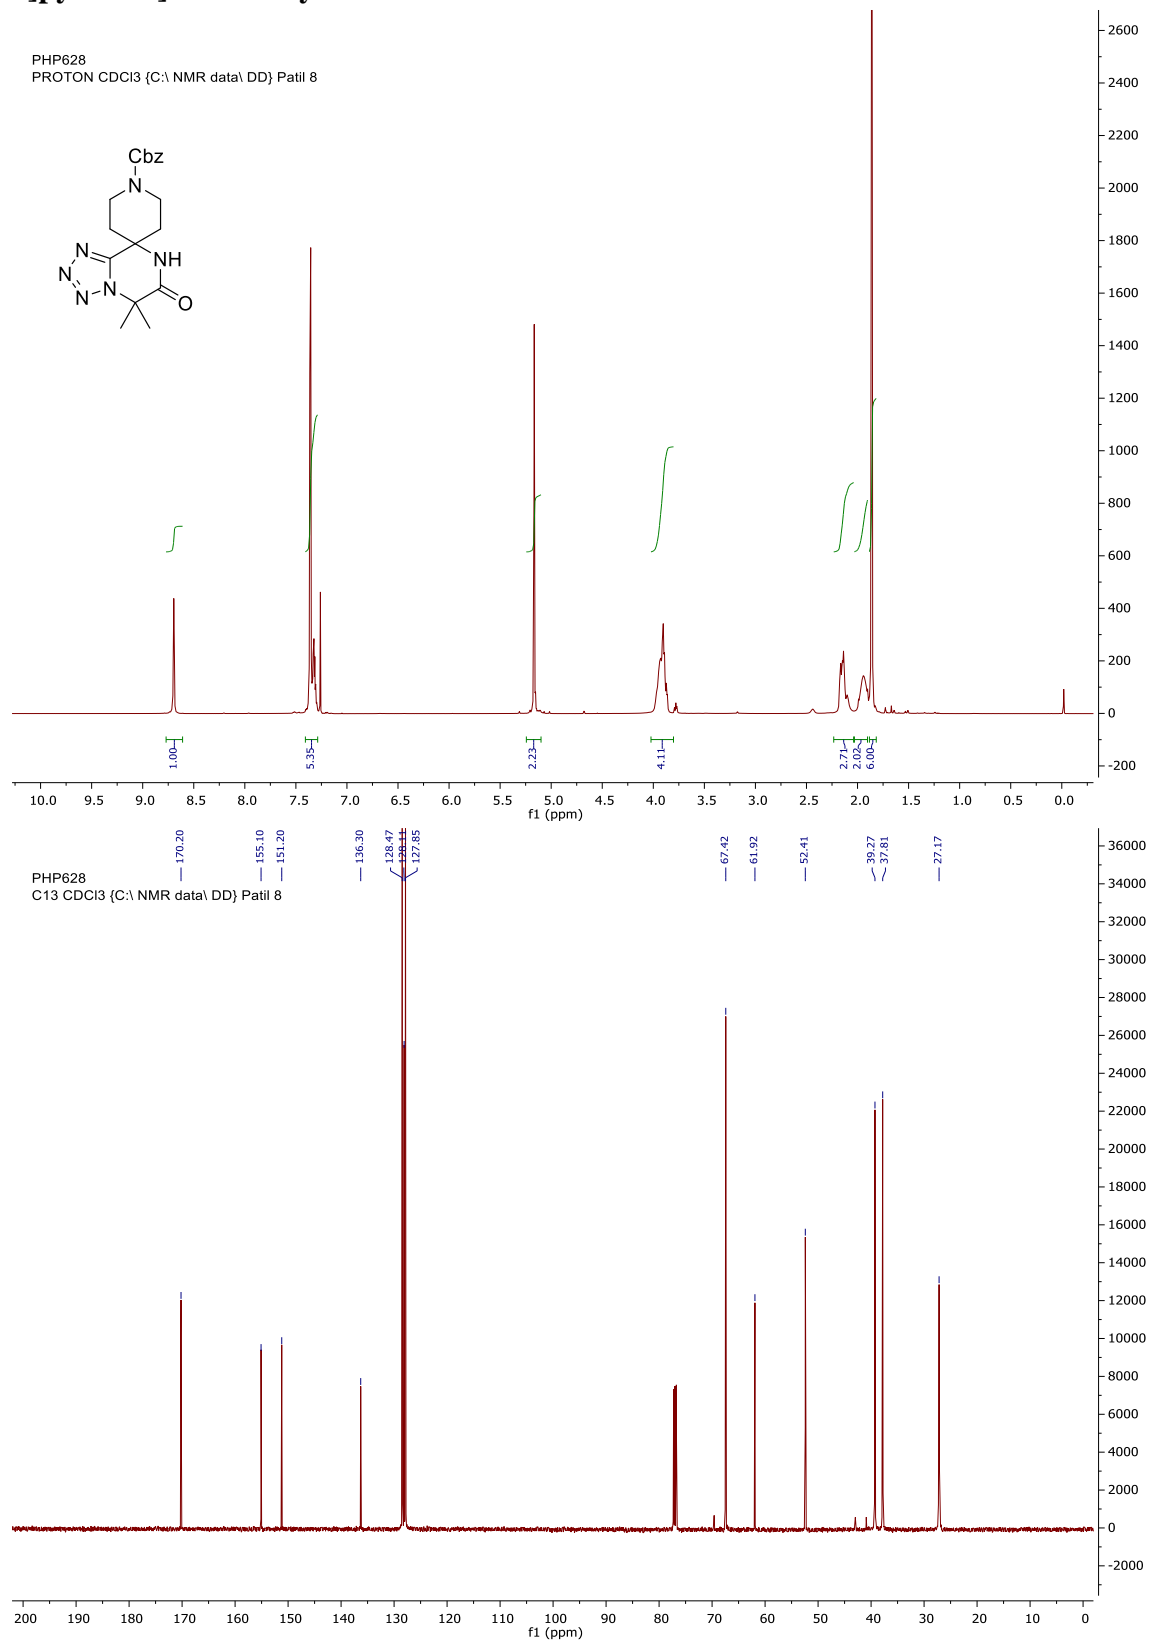

PHP628\_1\_Col3\_Sol1\_5-30%\_6min

PHP628\_1

3: Diode Array  
Range: 2.788

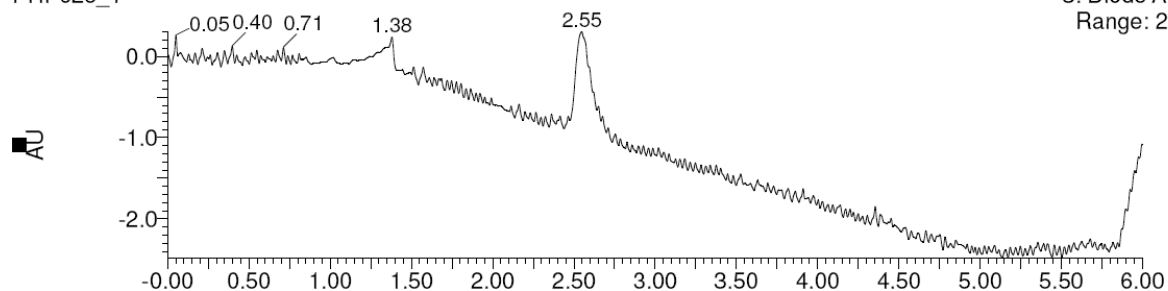

PHP628\_1

1: Scan ES+  
371  
6.63e5

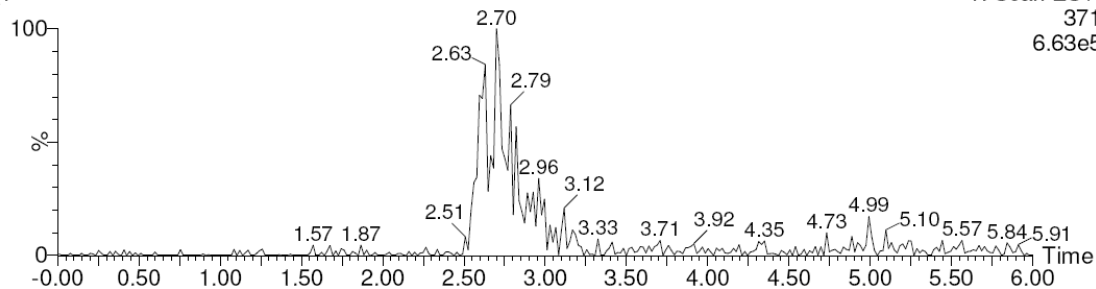

PHP628\_1\_Col3\_Sol1\_5-30%\_6min

PHP628\_1 149 (2.579)

1: Scan ES+  
8.39e6

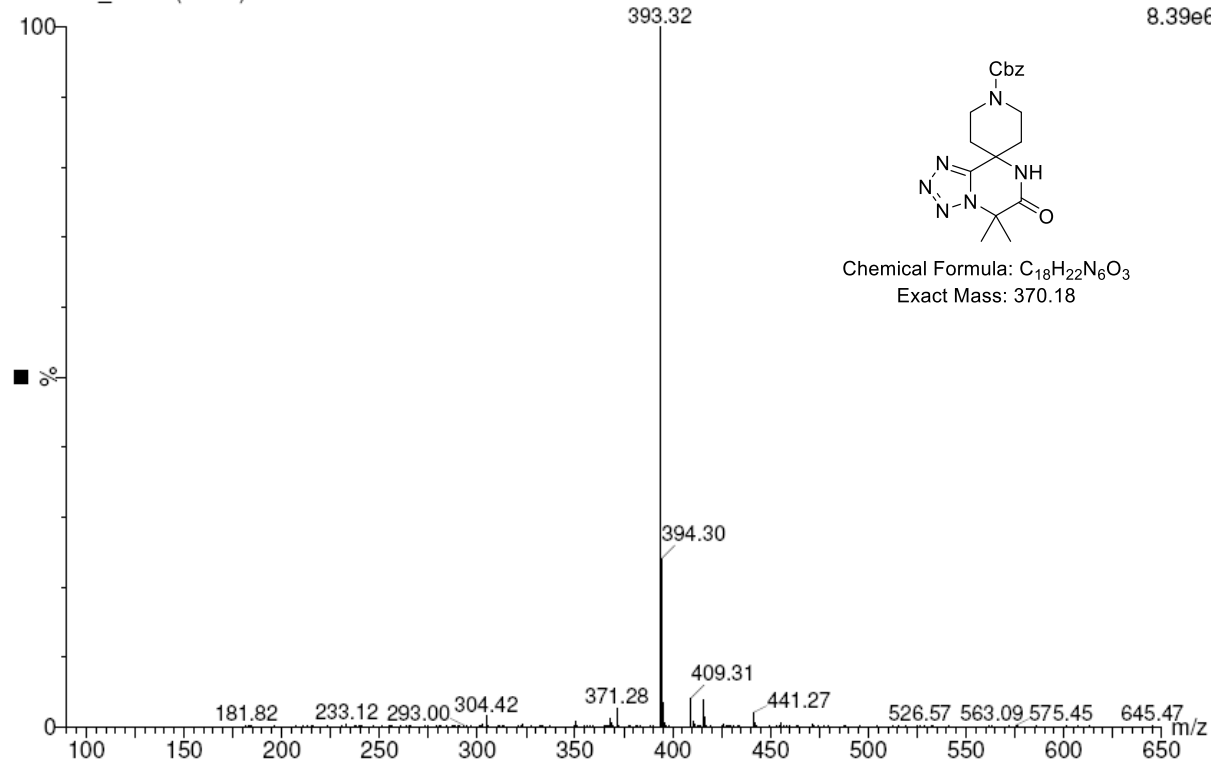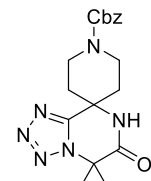

Chemical Formula: C<sub>18</sub>H<sub>22</sub>N<sub>6</sub>O<sub>3</sub>  
Exact Mass: 370.18

# 29c: ethyl 5',5'-dimethyl-6'-oxo-6',7'-dihydro-5'H-spiro[piperidine-4,8'-tetrazolo[1,5-a]pyrazine]-1-carboxylate

PHP629  
PROTON CDCl3 (C\ NMR data\ DD) Patil 9

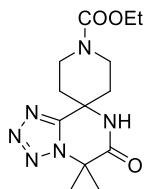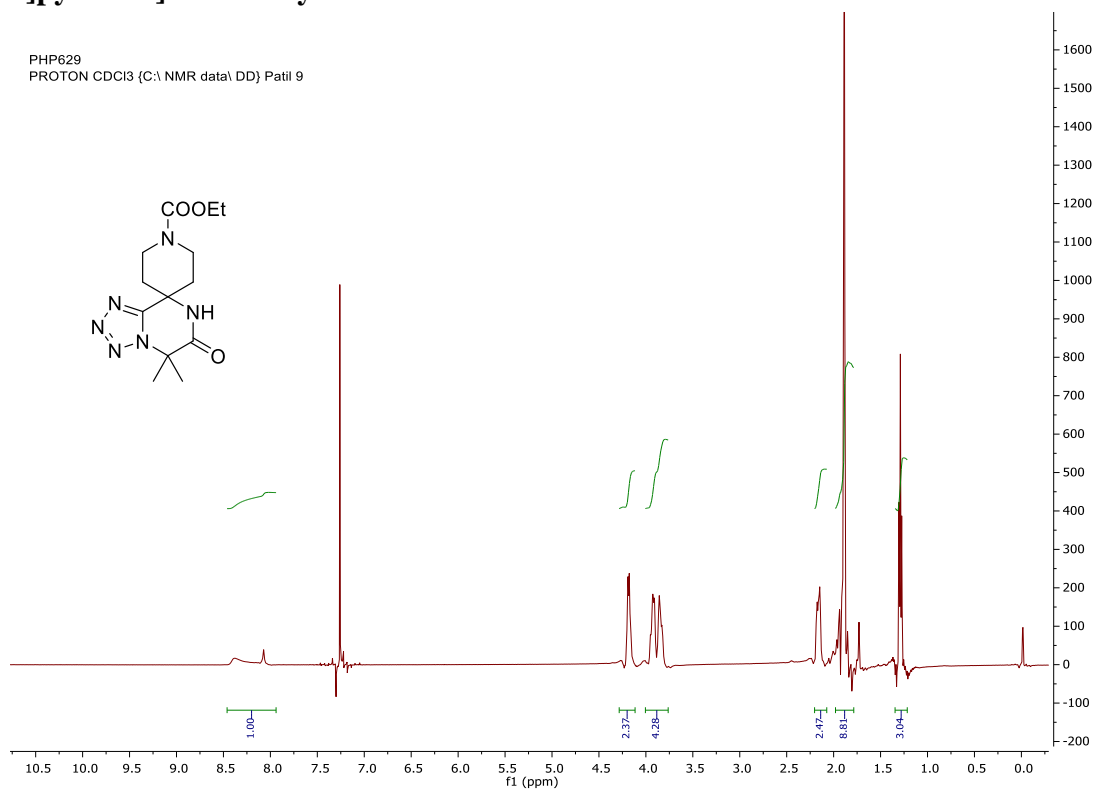

PHP629  
C13 CDCl3 (C\ NMR data\ DD) Patil 9

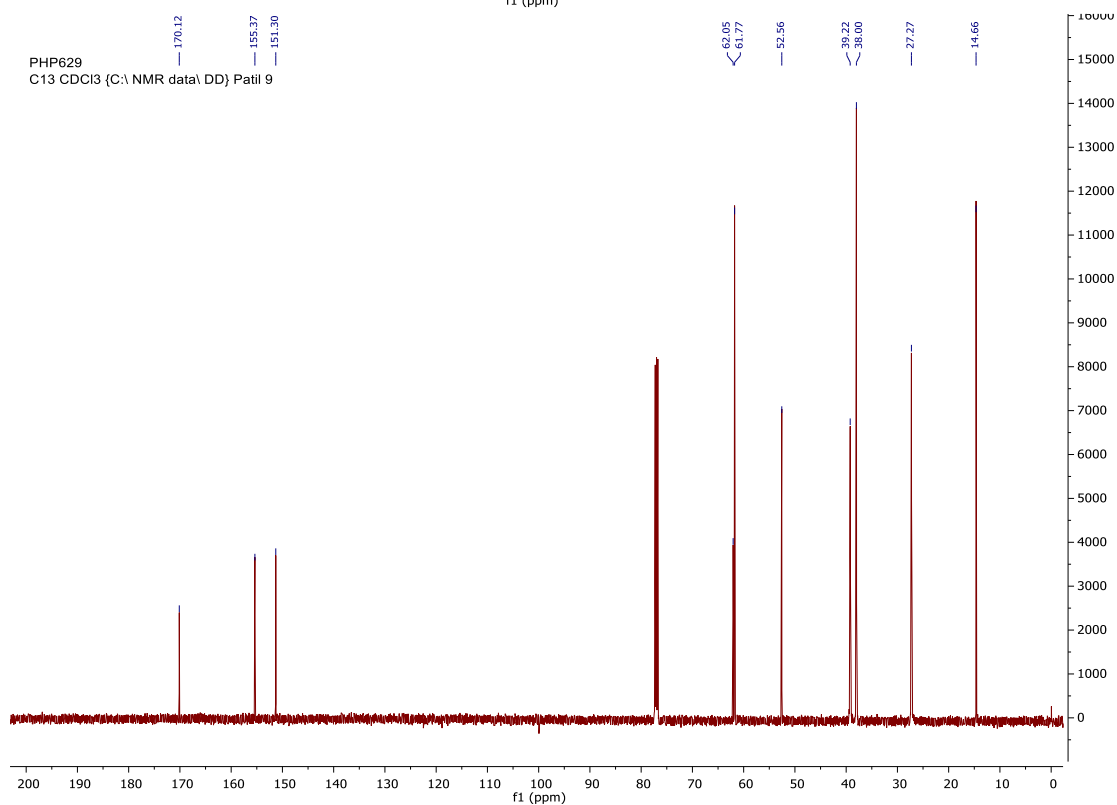



PHP629\_1\_Col3\_Sol1\_5-30%\_6min  
PHP629\_1

3: Diode Array  
Range: 2.708

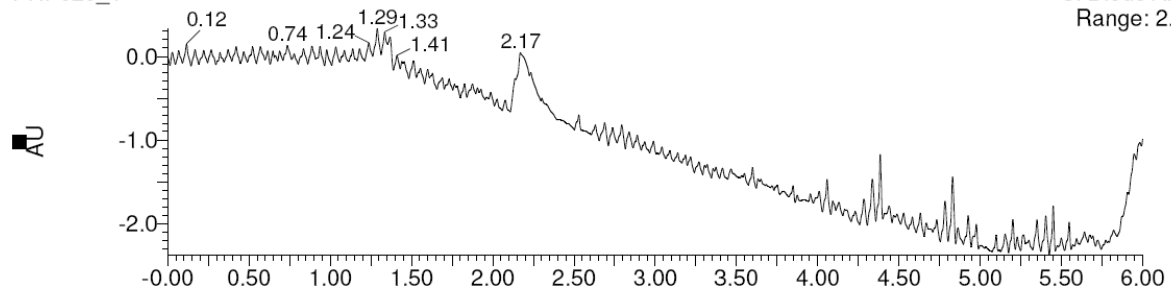

PHP629\_1

1: Scan ES+  
309  
2.65e5

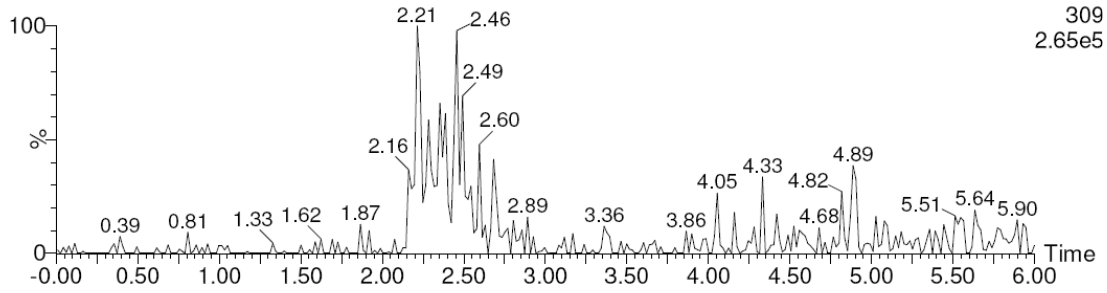

PHP629\_1\_Col3\_Sol1\_5-30%\_6min  
PHP629\_1 126 (2.179)

1: Scan ES+  
1.35e7

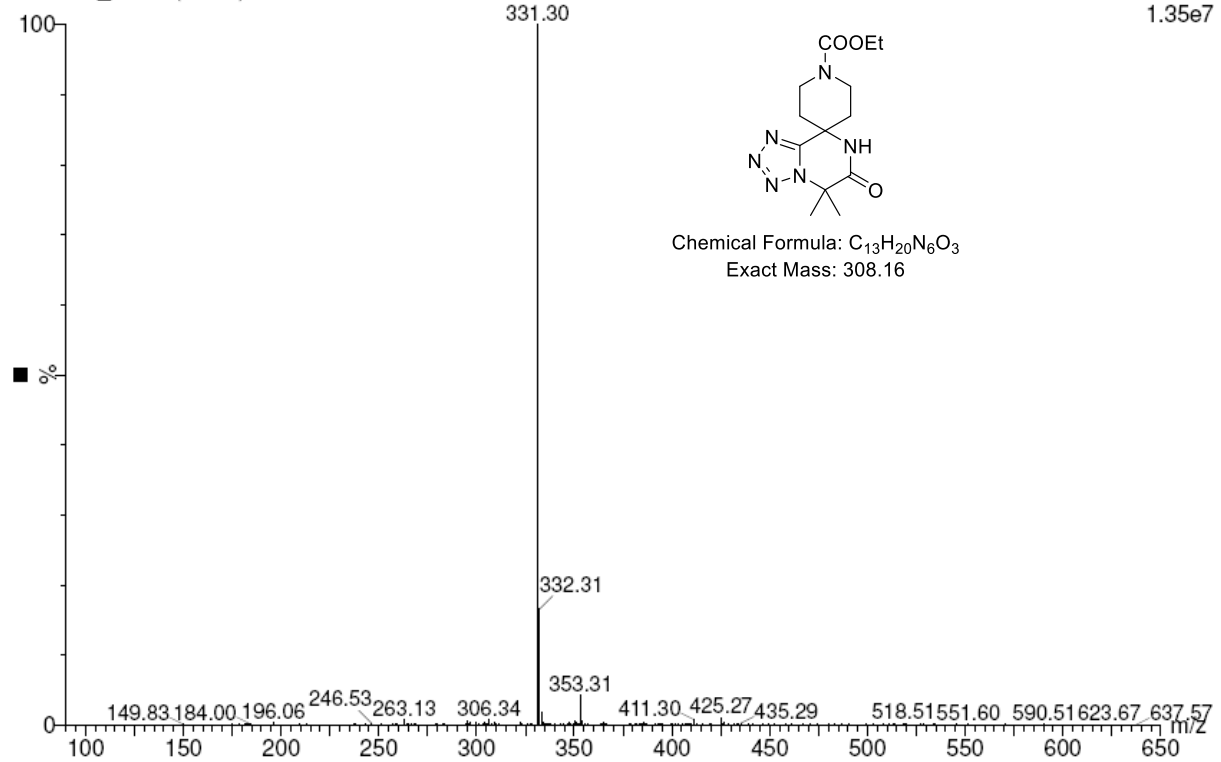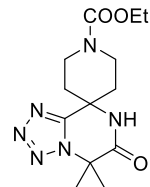

Chemical Formula: C<sub>13</sub>H<sub>20</sub>N<sub>6</sub>O<sub>3</sub>  
Exact Mass: 308.16

### 36c: 5-isobutyl-8,8-dimethyl-7,8-dihydro-1,5-a-pyrazin-6(5H)-one

PHP1415/1  
PHP1415  
PROTON CDCl3 {C:\NMR data\DD} Patil 28

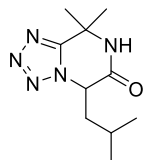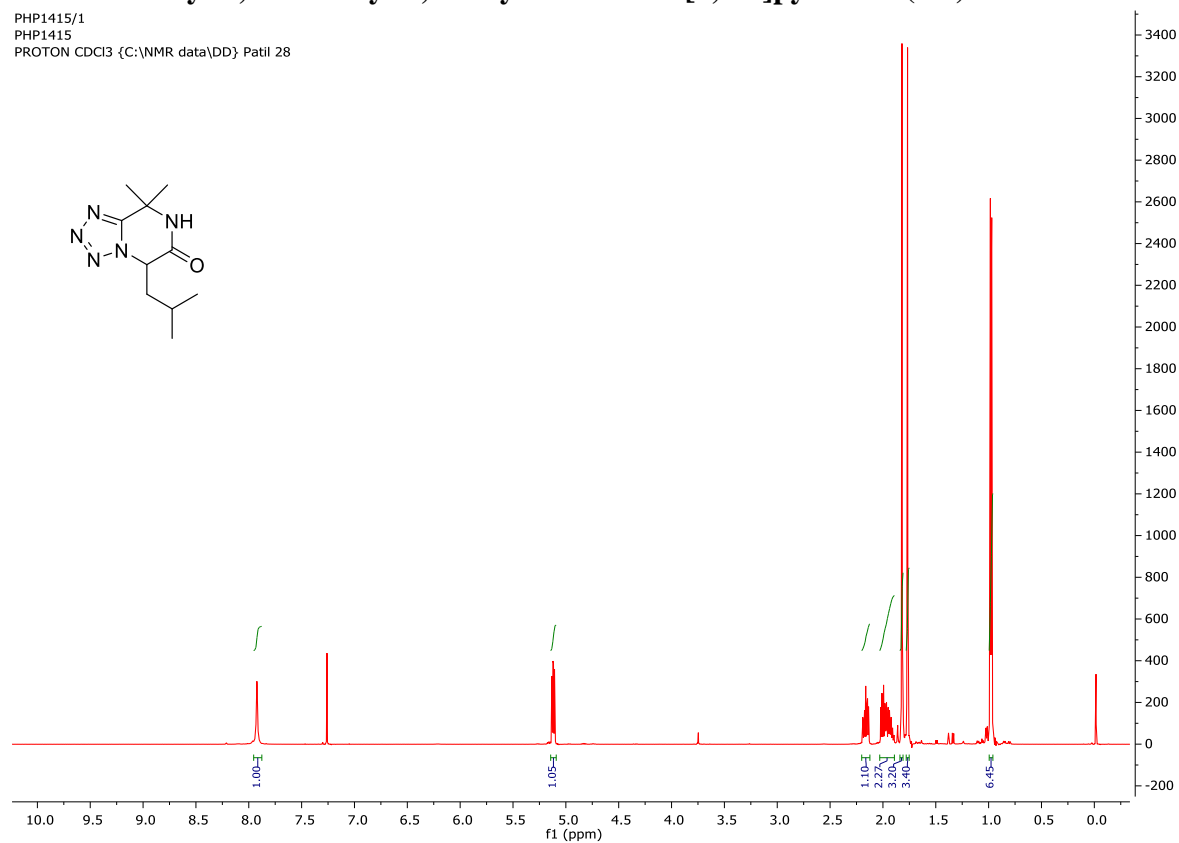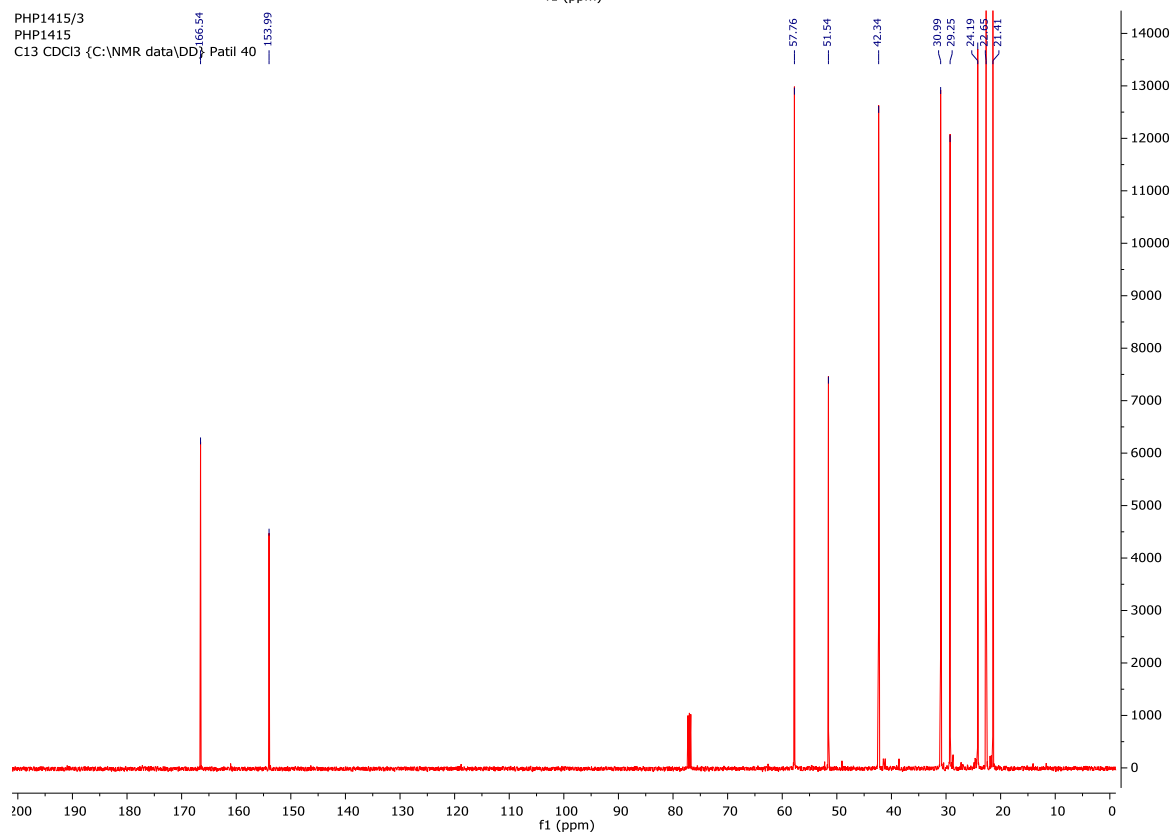

PHP1415\_1\_Col3\_Sol1\_5-30%\_6min

PHP1415\_1

3: Diode Array  
Range: 2.647

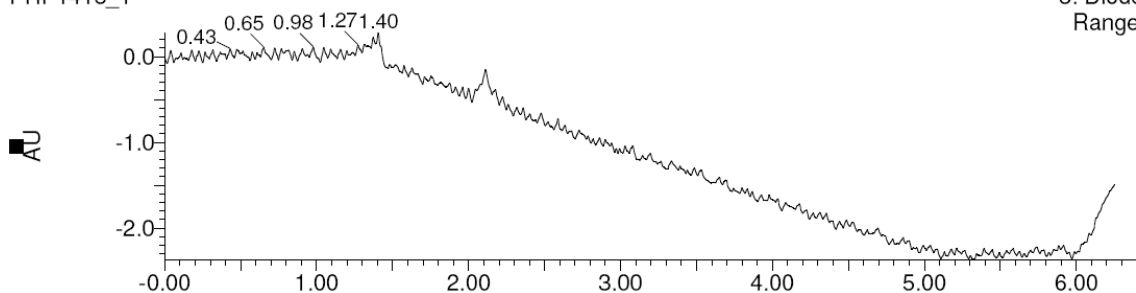

PHP1415\_1

1: Scan ES+  
224  
3.25e7

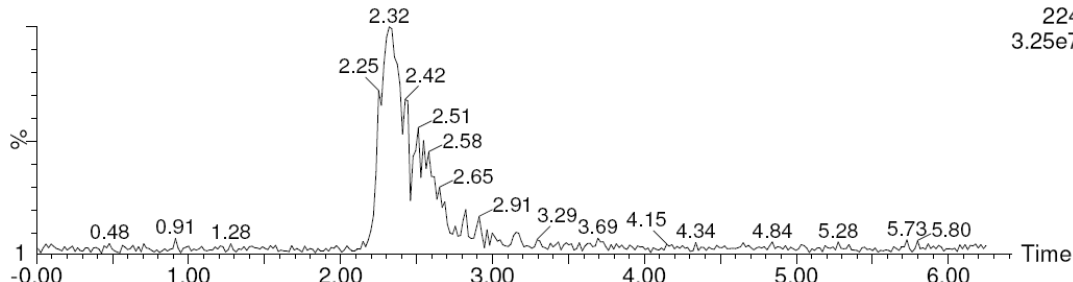

PHP1415\_1 135 (2.346) Cm (128:151)

2: Scan ES-  
8.12e5

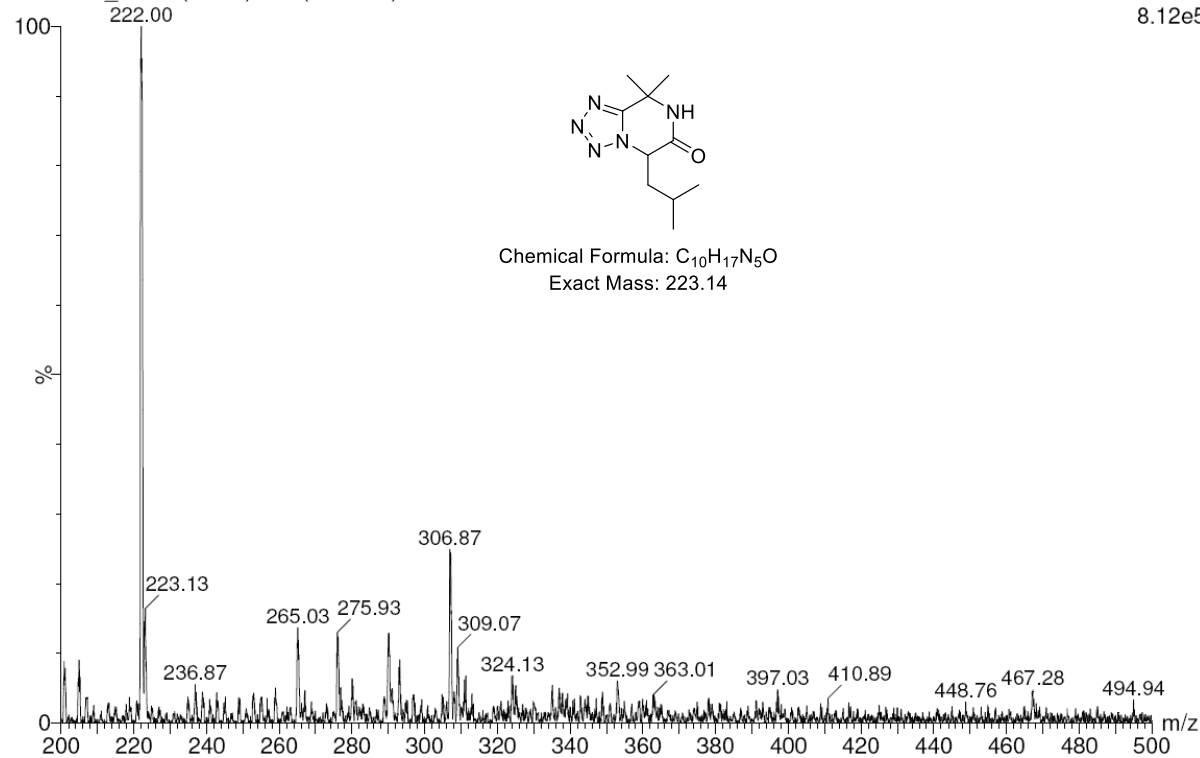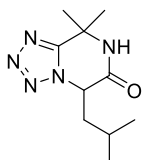

Chemical Formula: C<sub>10</sub>H<sub>17</sub>N<sub>5</sub>O  
Exact Mass: 223.14

### 37c: 37c: 5-isobutyl-8-isopropyl-8-methyl-7,8-dihydro-tetrazolo[1,5-a]pyrazin-6(5H)-one

PHP1416/1  
PHP1416  
PROTON CDCl3 {C:\NMR data\DD} Patil 29

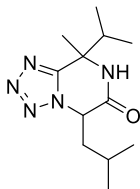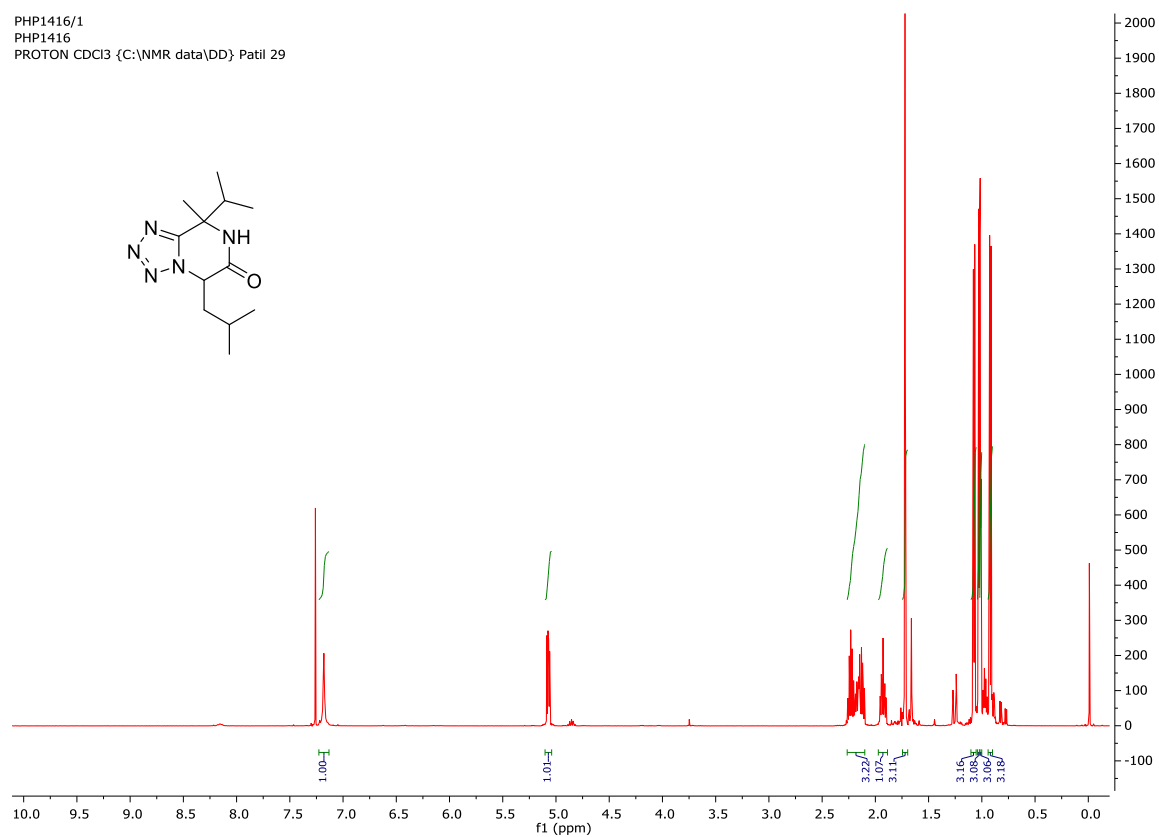

PHP1416/2  
PHP1416  
C13 CDCl3 {C:\NMR data\DD} Patil 41

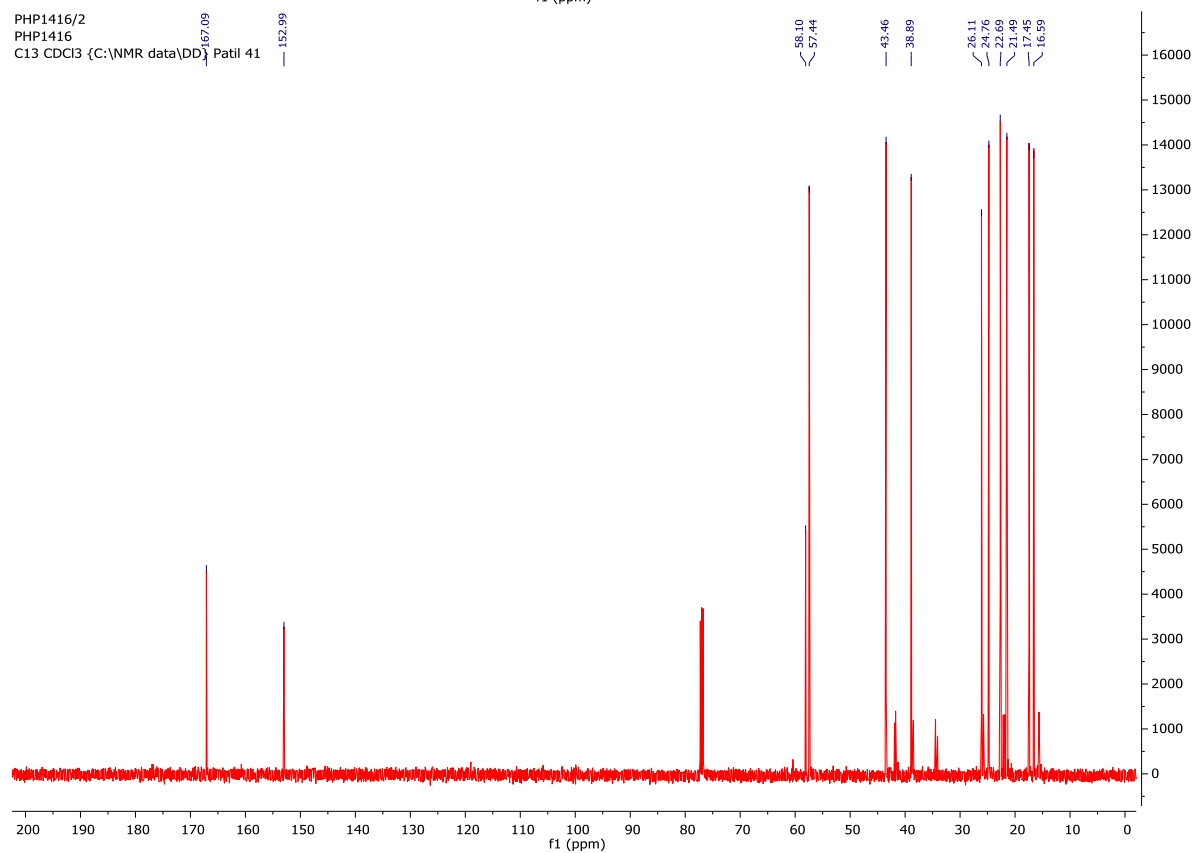

PHP1416\_1\_Col3\_Sol1\_5-30%\_6min

PHP1416\_1

3: Diode Array  
Range: 2.947

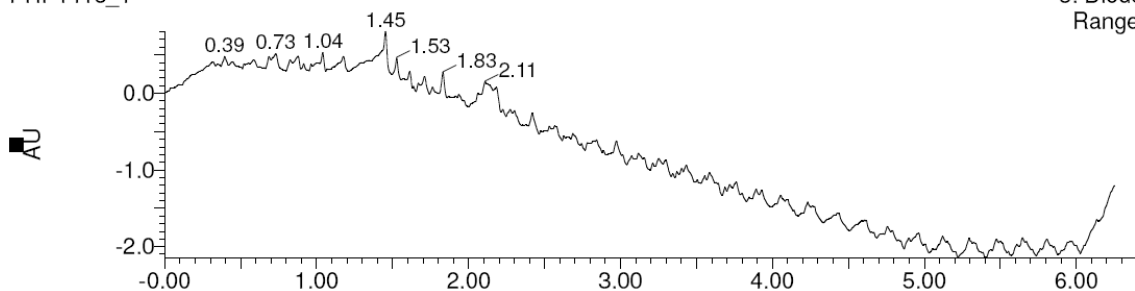

PHP1416\_1

2: Scan ES-  
250  
1.75e7

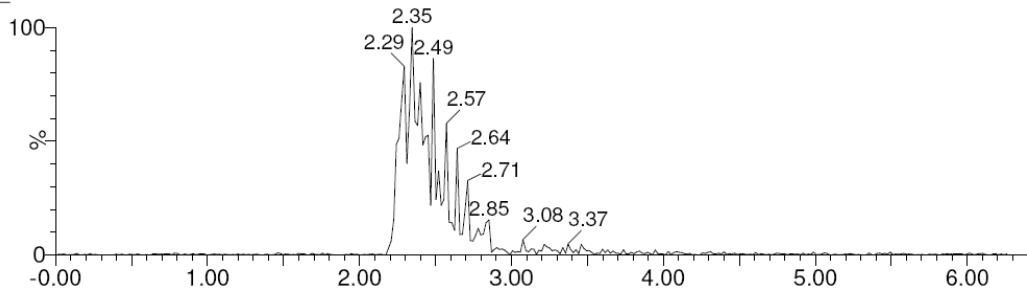

PHP1416\_1\_Col3\_Sol1\_5-30%\_6min

PHP1416\_1 135 (2.346) Cm (128:148)

2: Scan ES-  
9.47e5

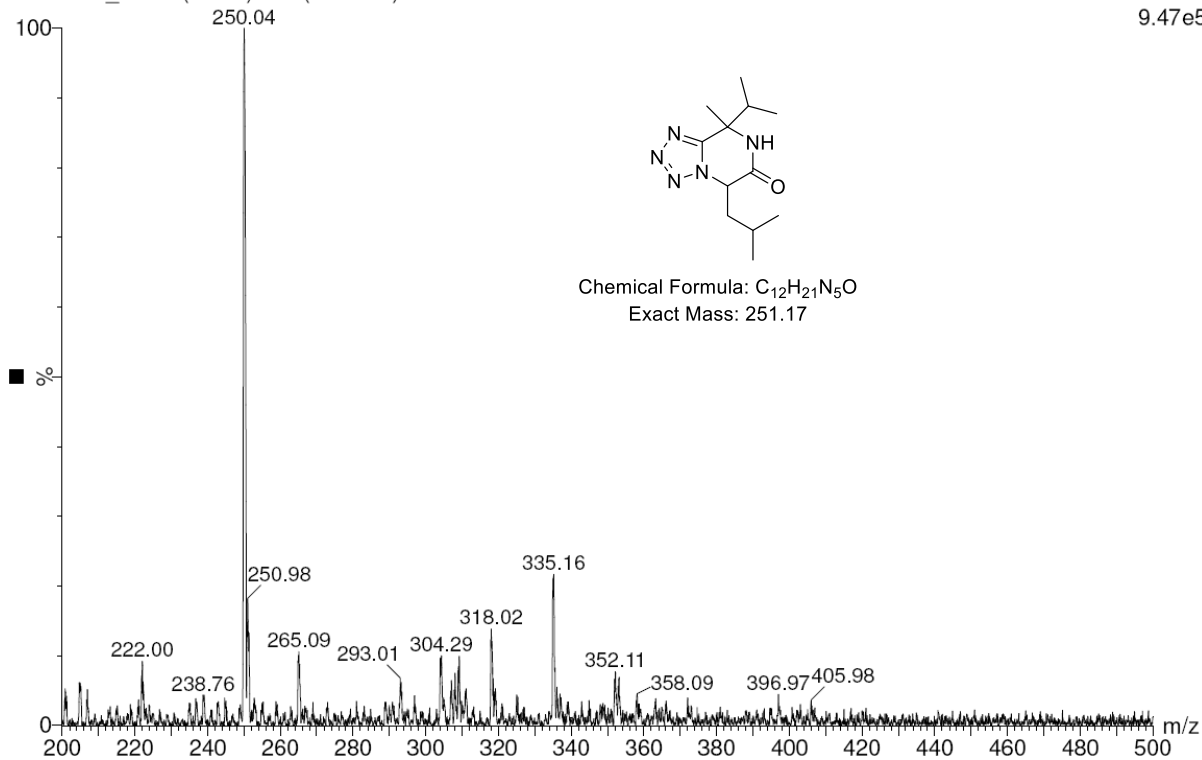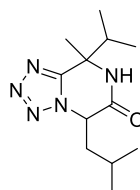

Chemical Formula: C<sub>12</sub>H<sub>21</sub>N<sub>5</sub>O  
Exact Mass: 251.17

# 38c: 38c: 8-(hydroxymethyl)-5-isobutyl-8-methyl-7,8-dihydro-1,5-a-pyrazin-6(5H)-one

PHP1421.1.fid  
PHP1421  
PROTON MeOD (C:\WMR data\DD) Patil 16

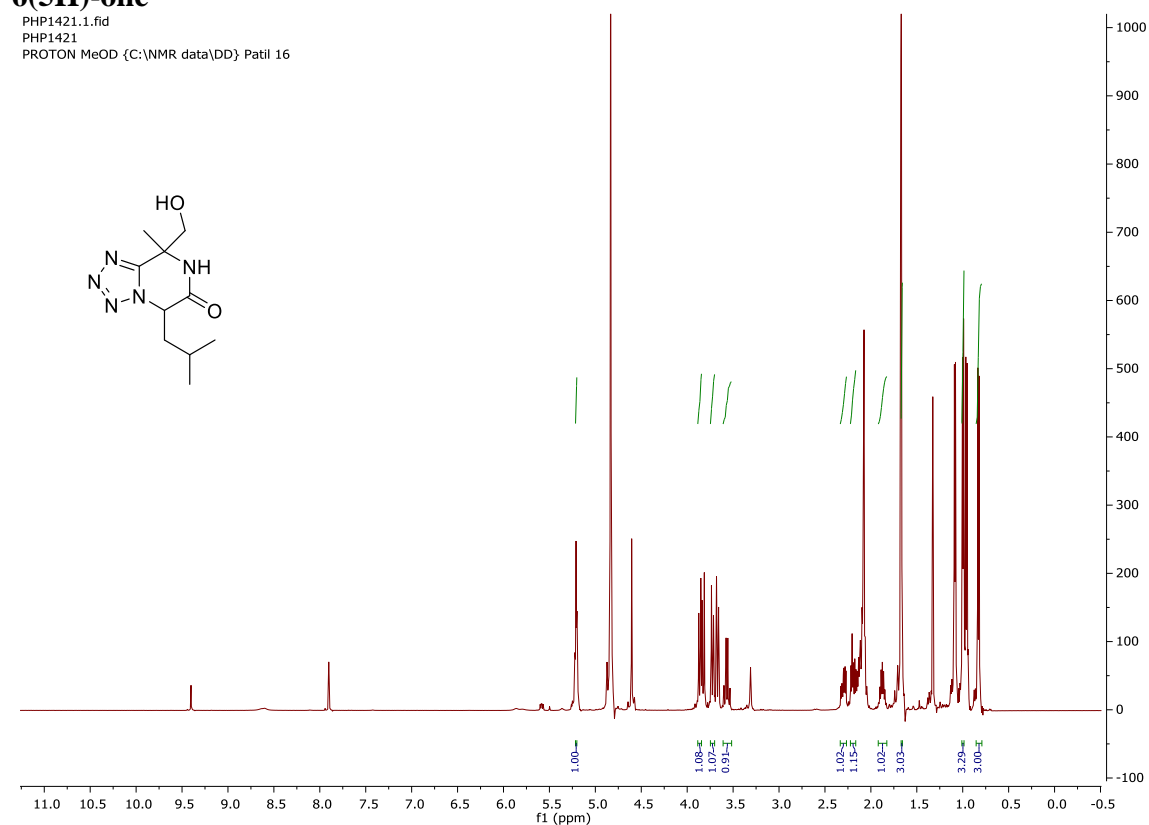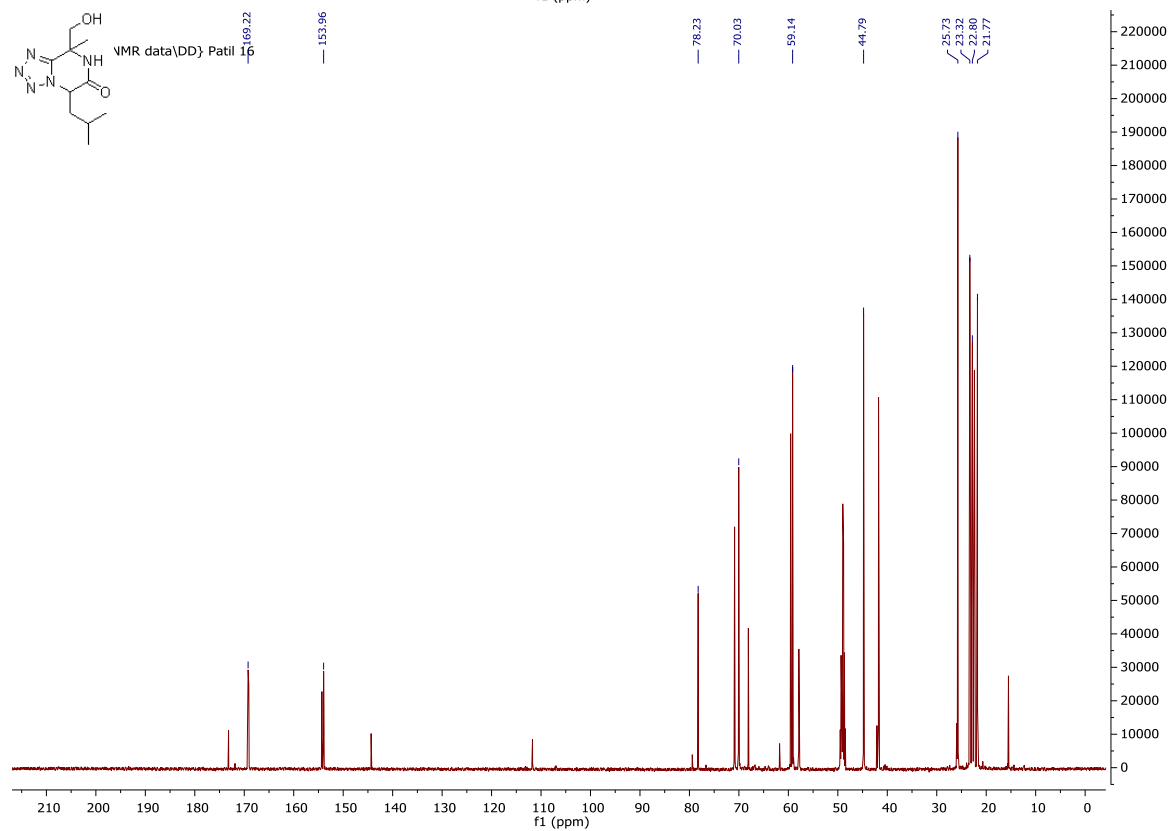

PHP1421\_1\_Col3\_Sol1\_5-30%\_6min  
PHP1421\_1

3: Diode Array  
Range: 2.893

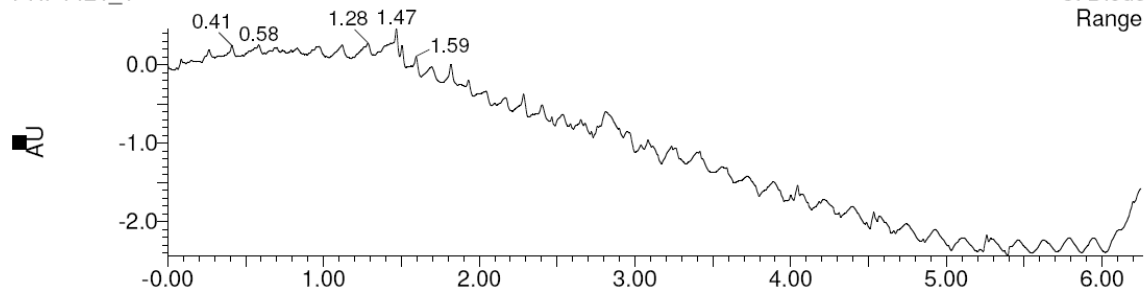

PHP1421\_1  
2: Scan ES-238  
1.65e7

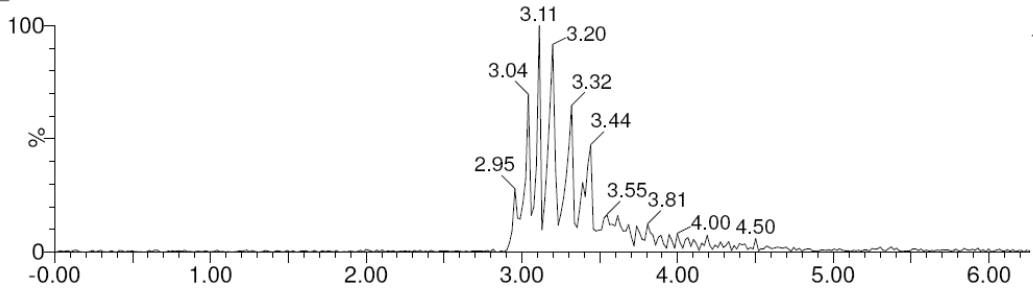

PHP1421\_1 178 (3.094)  
2: Scan ES-9.46e5

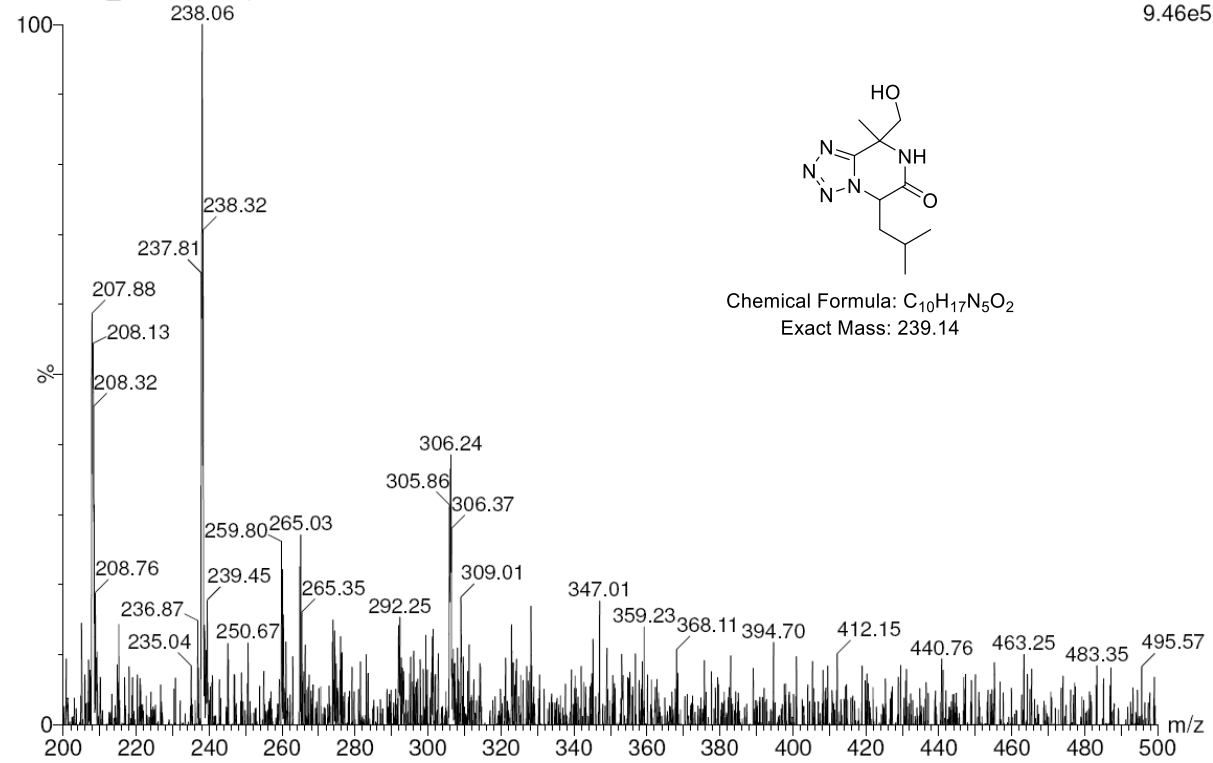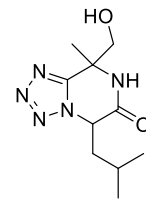

Chemical Formula: C<sub>10</sub>H<sub>17</sub>N<sub>5</sub>O<sub>2</sub>  
Exact Mass: 239.14

# 41c: 5'-isobutyl-5'H-spiro[cyclohexane-1,8'-tetrazolo[1,5-a]pyrazin]-6'(7'H)-one

PHP1417/1  
PHP1417  
PROTON CDCl3 {C:\NMR data\DD} Patil 36

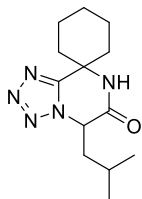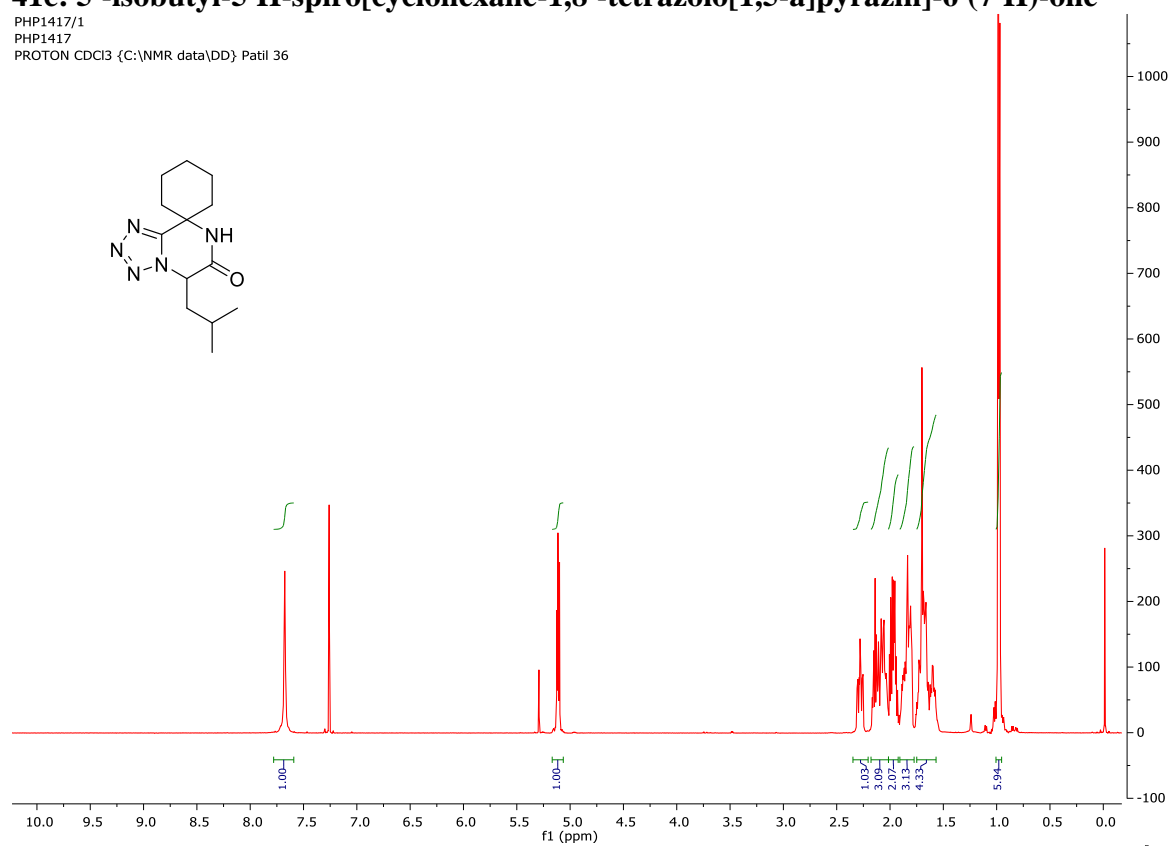

PHP1417/4  
PHP1417  
C13 CDCl3 {C:\NMR data\DD} Patil 43

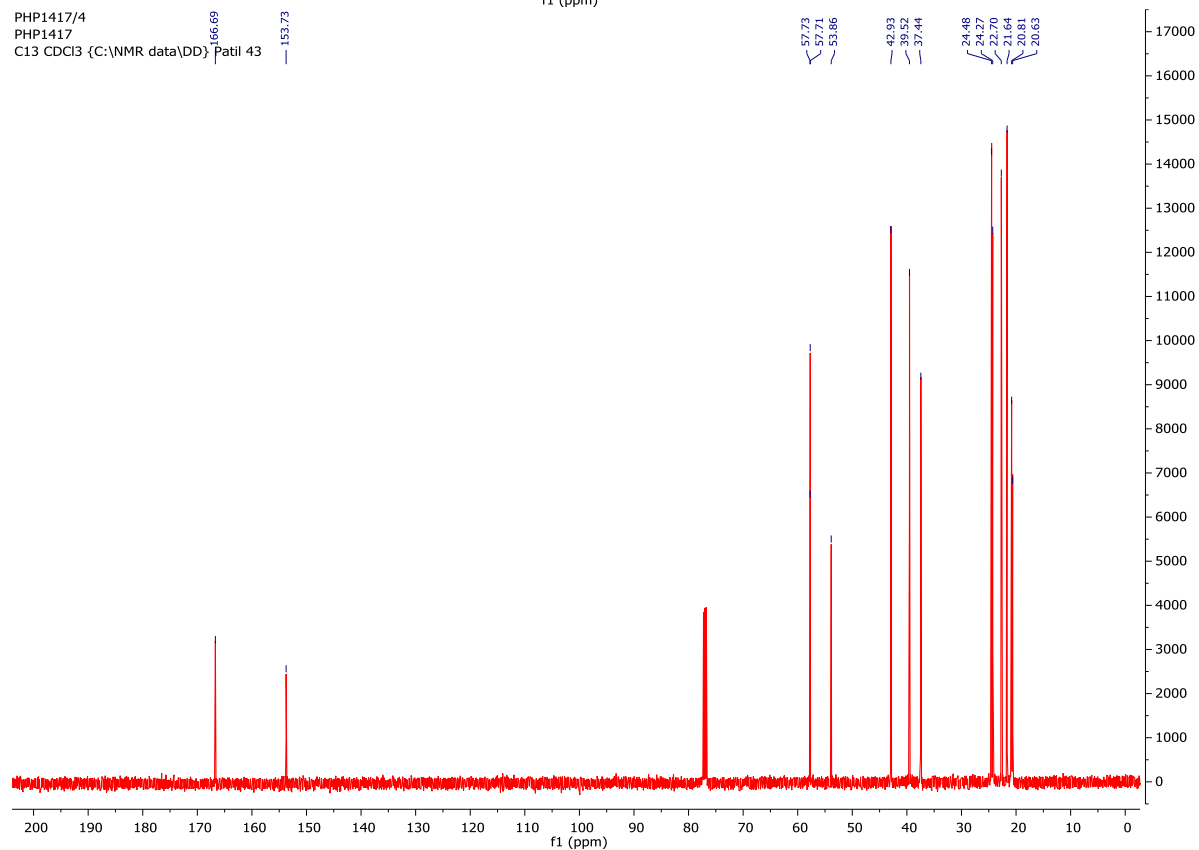



PHP1417\_1\_Col3\_Sol1\_5-30%\_6min

PHP1417\_1

3: Diode Array  
Range: 3.068

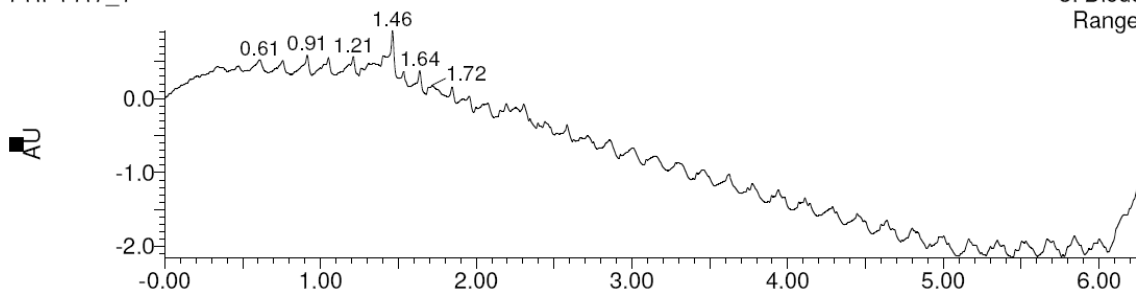

PHP1417\_1

2: Scan ES-  
262  
1.32e7

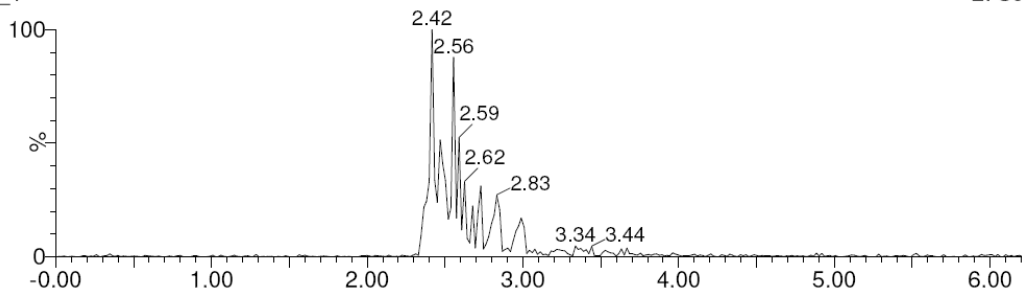

PHP1417\_1 147 (2.555) Cm (137:151)

2: Scan ES-  
5.95e5

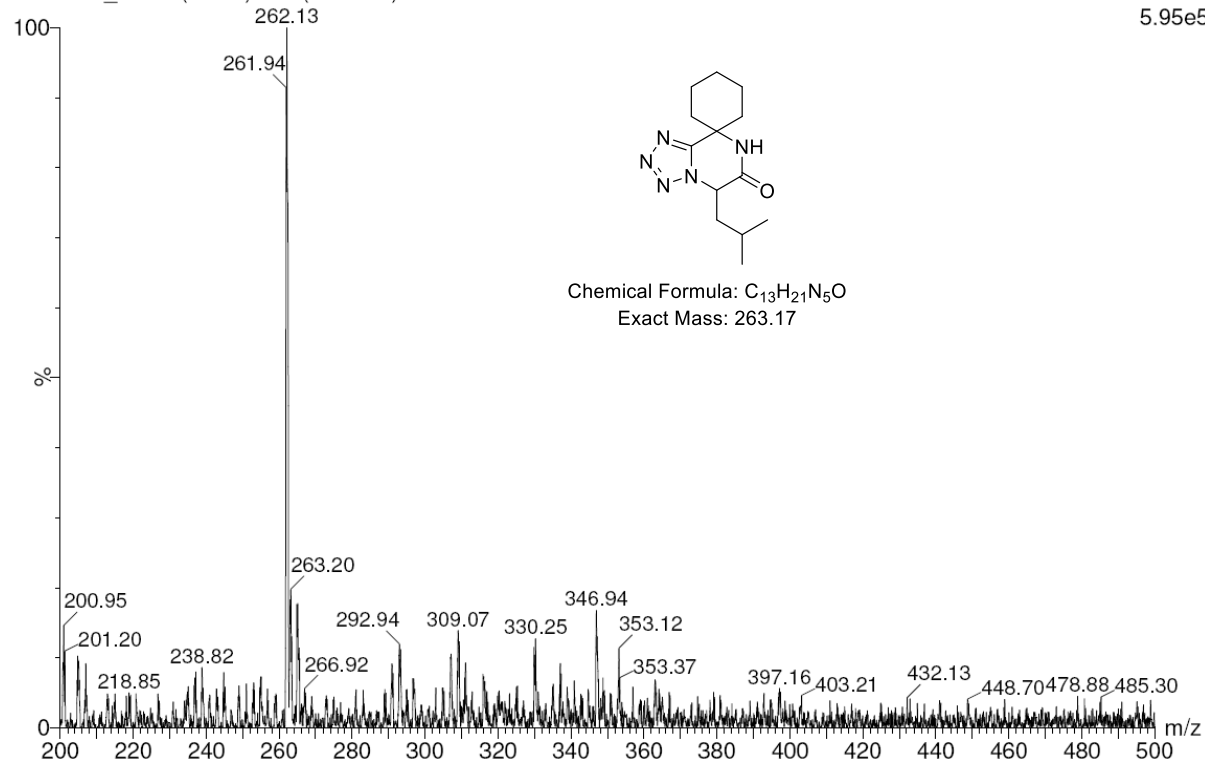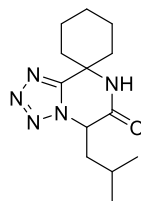

Chemical Formula: C<sub>13</sub>H<sub>21</sub>N<sub>5</sub>O  
Exact Mass: 263.17

# 42c: 1-benzyl-5'-isobutyl-5'H-spiro[piperidine-4,8'-tetrazolo[1,5-a]pyrazin]-6'(7'H)-one

PHP1418/1  
PHP1418  
PROTON DMSO (C:\NMR data\DD) Patil 34

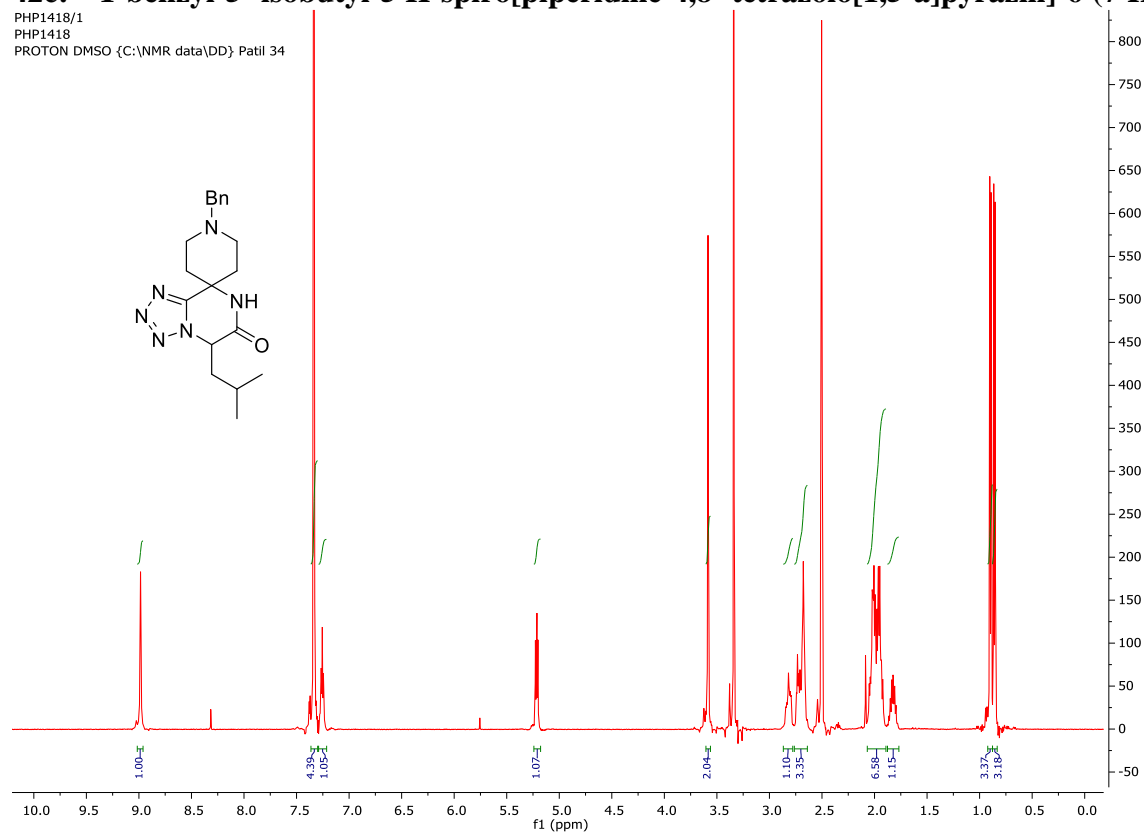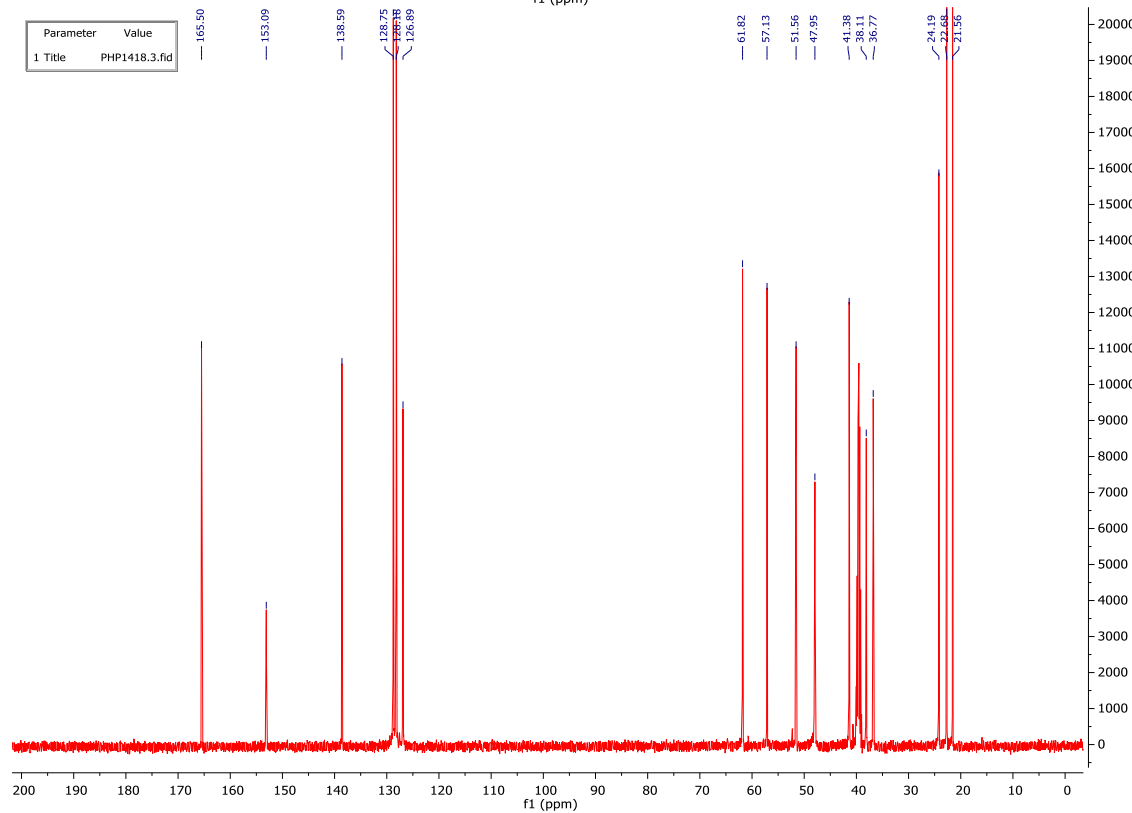

PHP1418\_1\_Col3\_Sol1\_5-30%\_6min

PHP1418\_1

3: Diode Array  
Range: 3.165

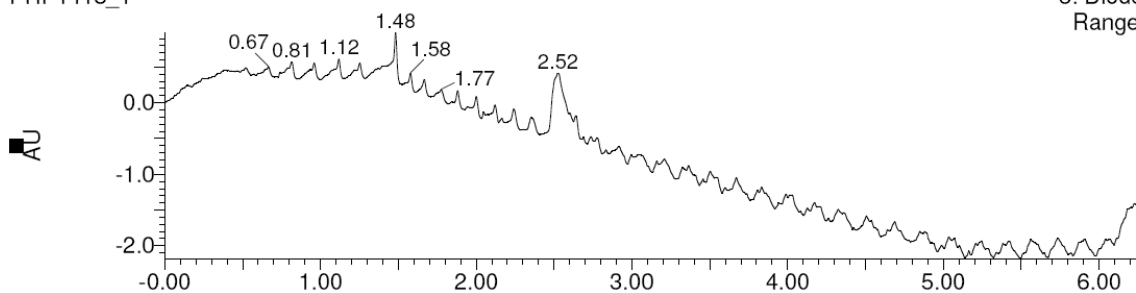

PHP1418\_1

1: Scan ES+  
355  
4.52e8

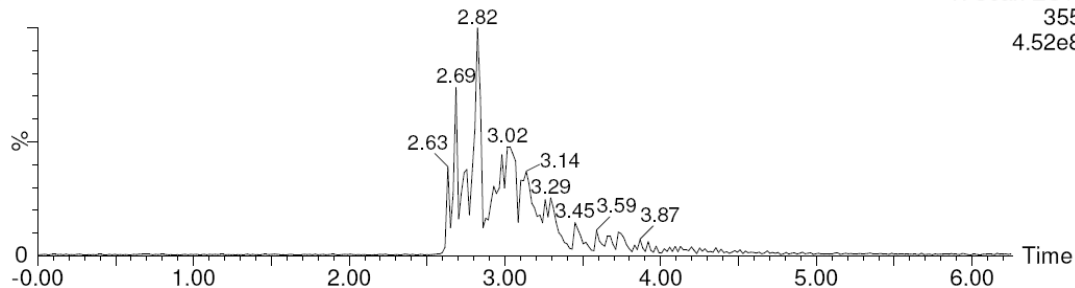

PHP1418\_1\_Col3\_Sol1\_5-30%\_6min

PHP1418\_1 163 (2.825) Cm (154:187)

1: Scan ES+  
2.11e7

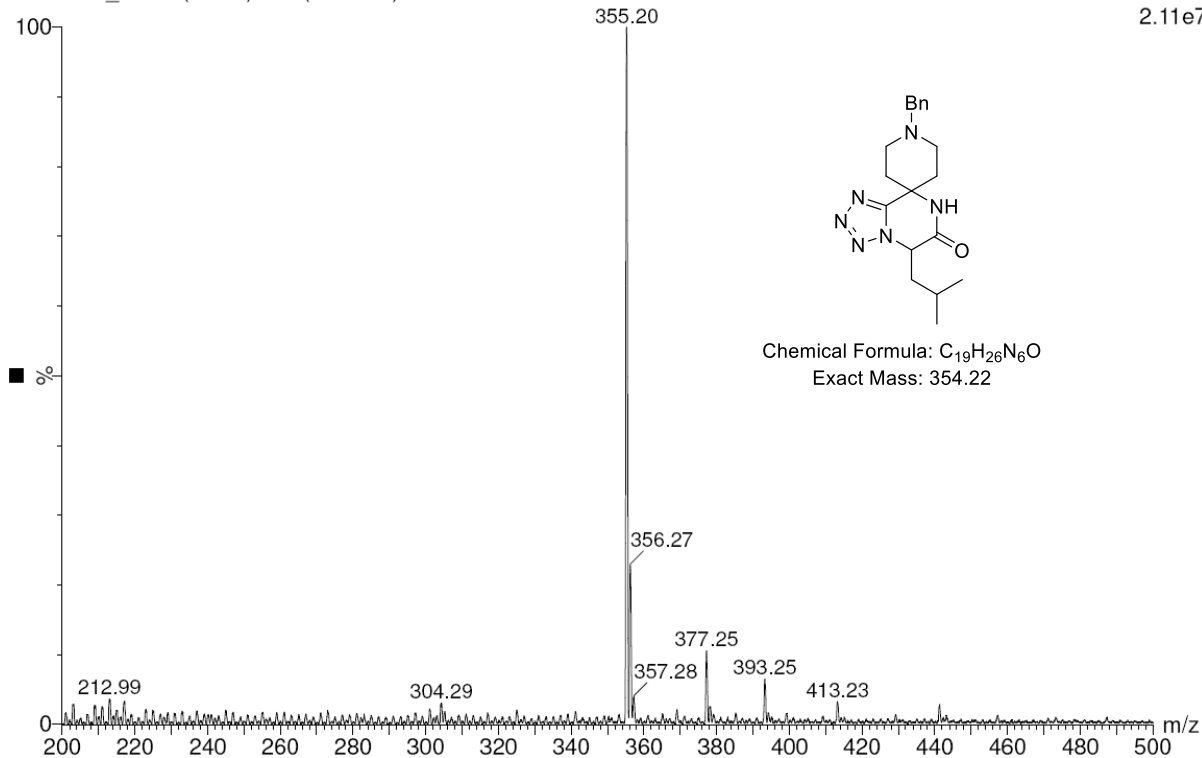

# 44c: 8,8-dimethyl-5-phenyl-7,8-dihydro-1H-tetrazolo[1,5-a]pyrazin-6(5H)-one

PHP667\_B  
PROTON CDCl3 (C:\NMR data\DD) Patil 3

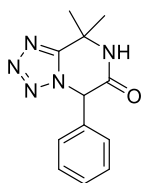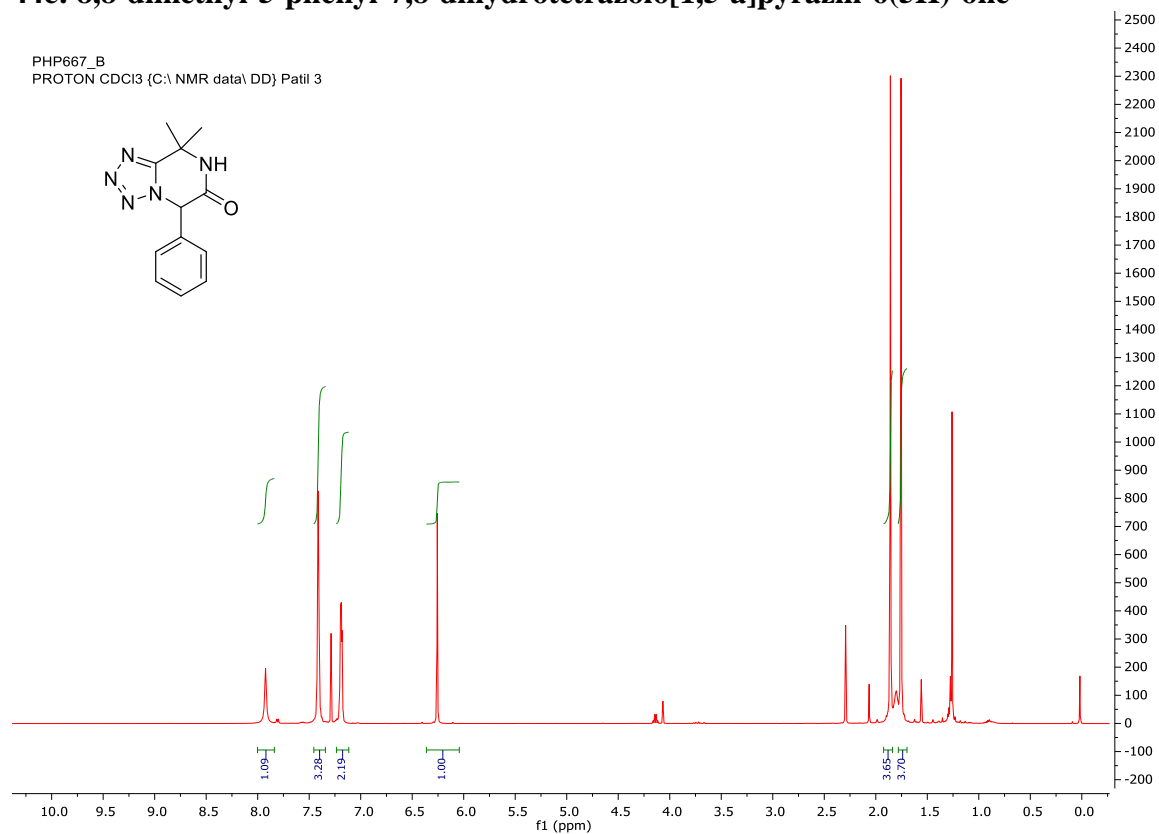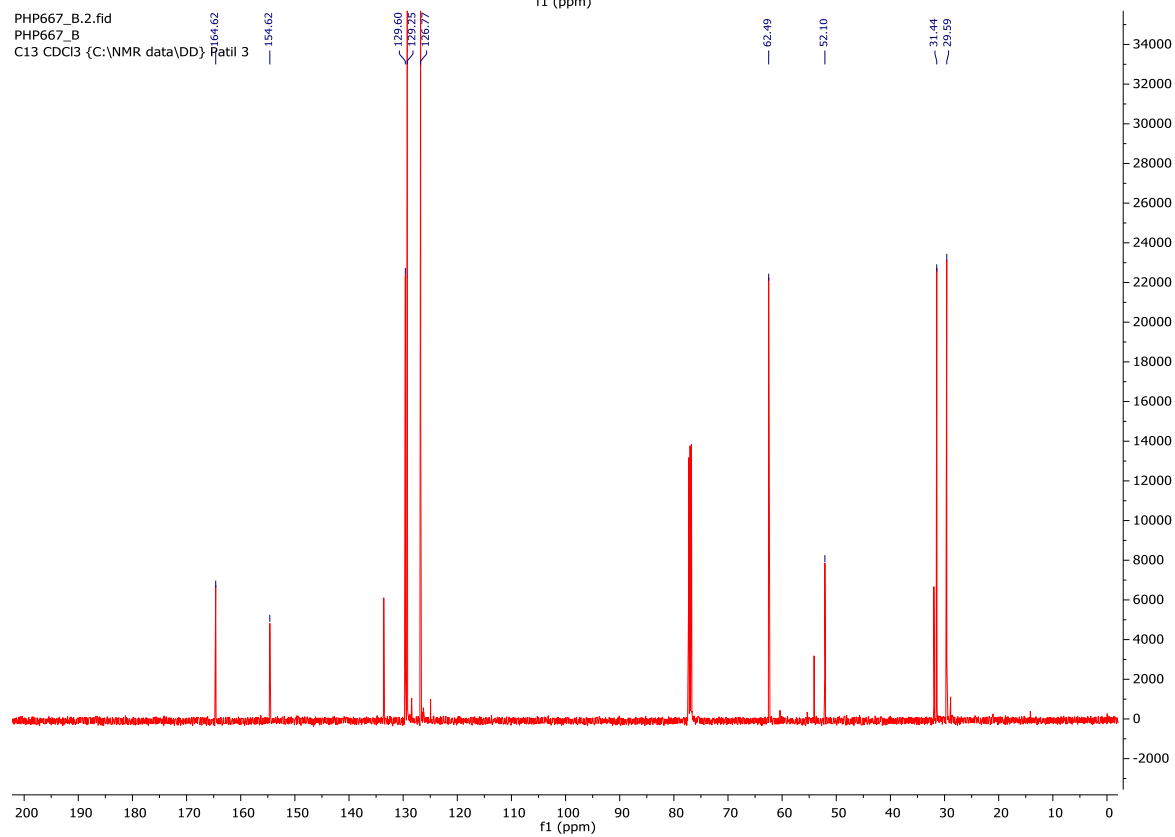

PHP667\_B\_1\_Col3\_Sol1\_5-30%\_6min

PHP667\_B\_1

3: Diode Array  
Range: 6.066

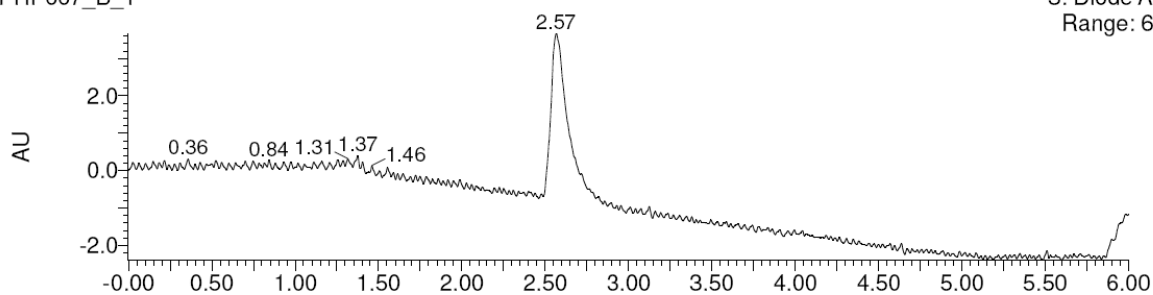

PHP667\_B\_1

2: Scan ES-  
242  
4.24e5

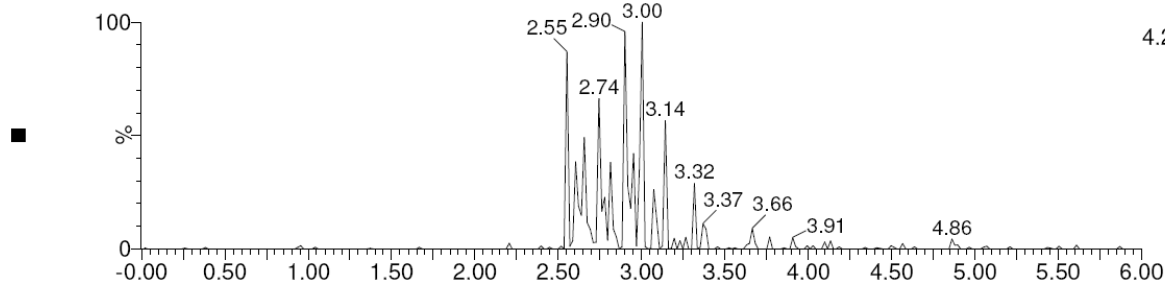

PHP667\_B\_1\_Col3\_Sol1\_5-30%\_6min

PHP667\_B\_1 147 (2.553)

2: Scan ES-  
3.68e5

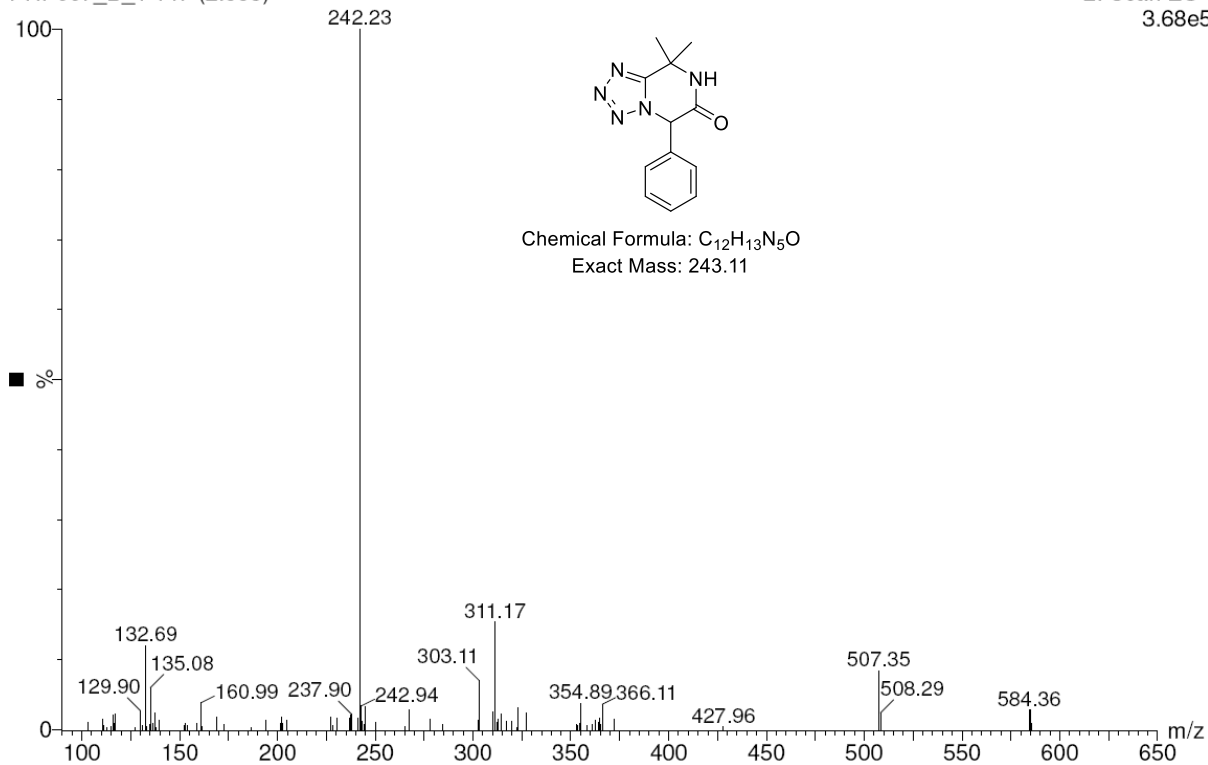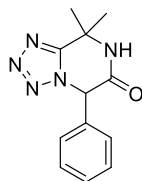

Chemical Formula: C<sub>12</sub>H<sub>13</sub>N<sub>5</sub>O  
Exact Mass: 243.11

# 45c: 8,8-diethyl-5-phenyl-7,8-dihydro-tetrazolo[1,5-a]pyrazin-6(5H)-one

PHP663/1  
PHP663

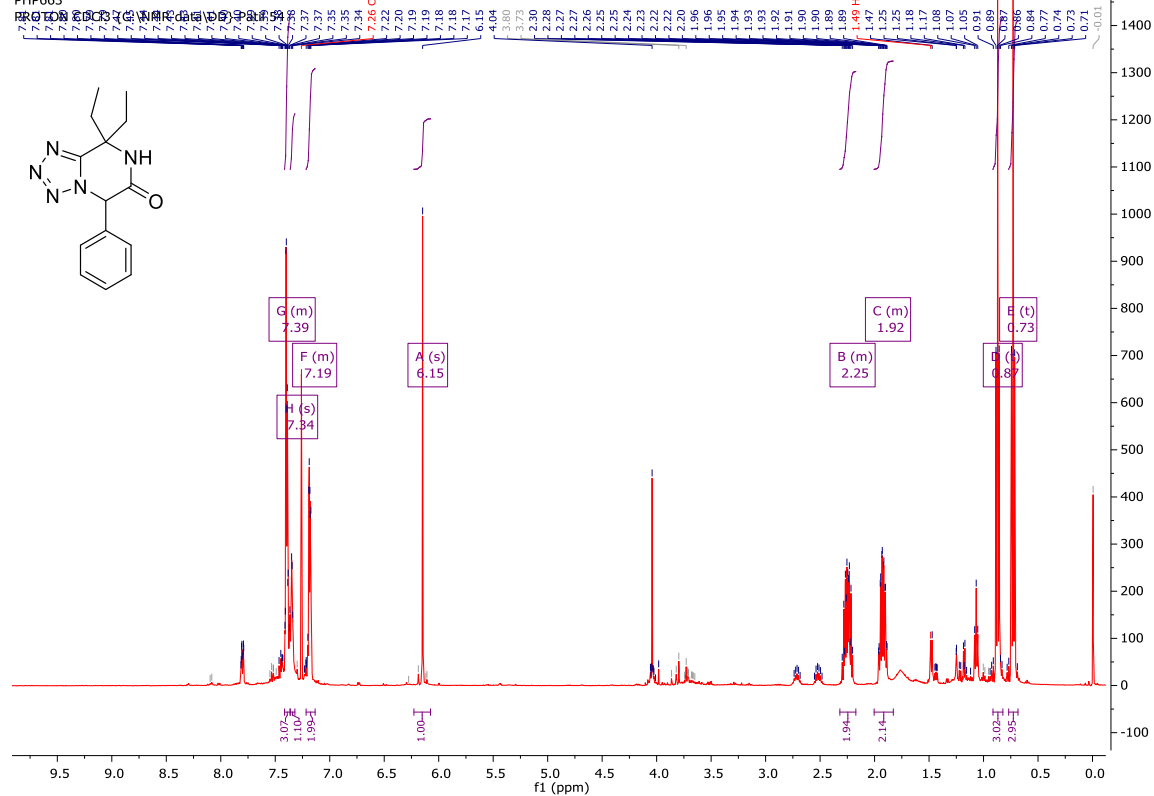

PHP663/2  
PHP663

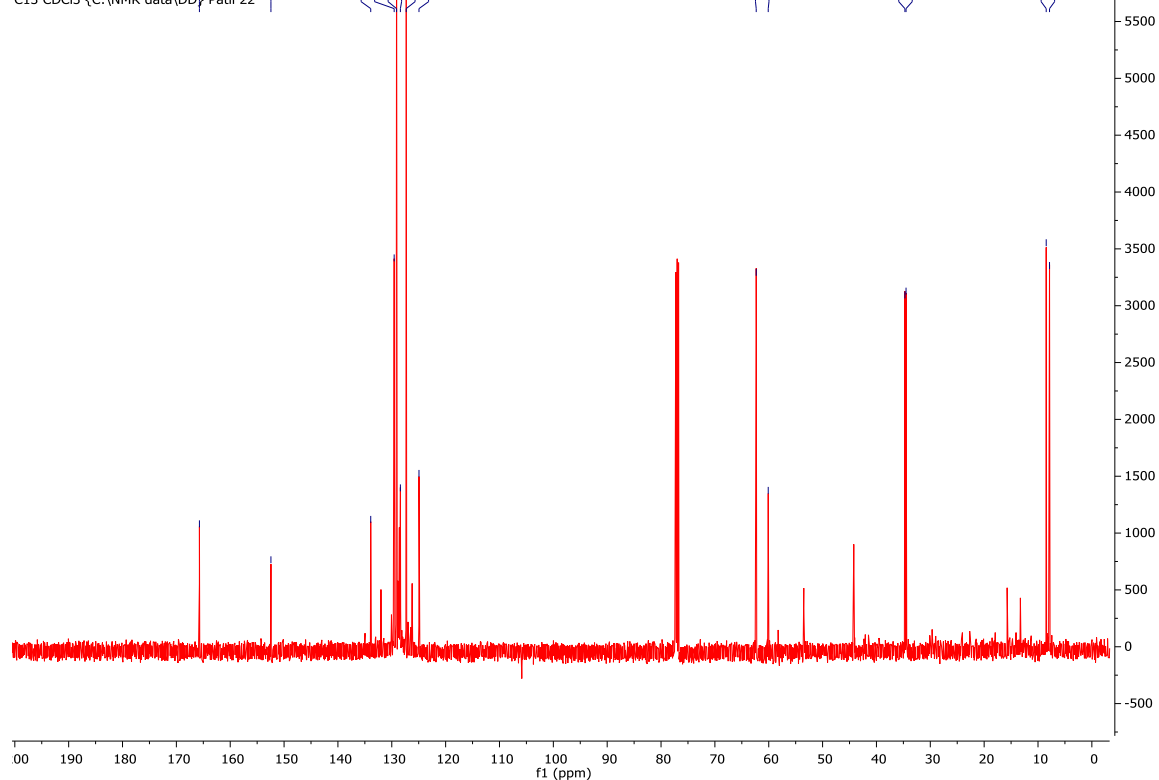

PHP\_663\_2\_Col3\_Sol1\_5-30%\_6min

PHP\_663\_2

3: Diode Array  
Range: 5.1

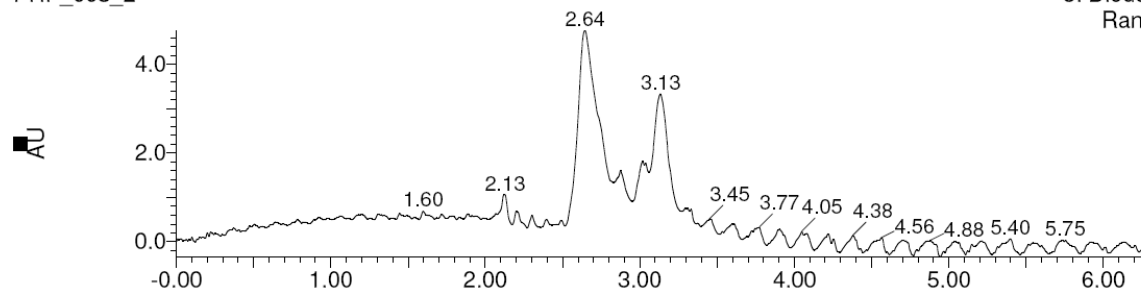

PHP\_663\_2

1: Scan ES+  
272  
7.55e7

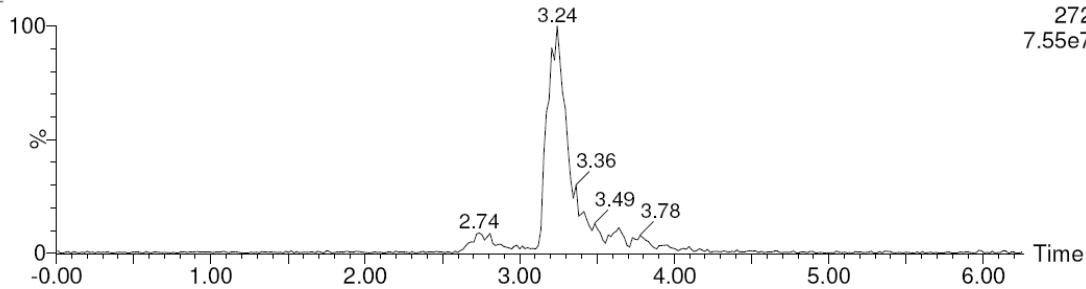

PHP\_663\_2\_Col3\_Sol1\_5-30%\_6min

PHP\_663\_2 186 (3.233) Cm (181:199)

2: Scan ES-  
3.01e6

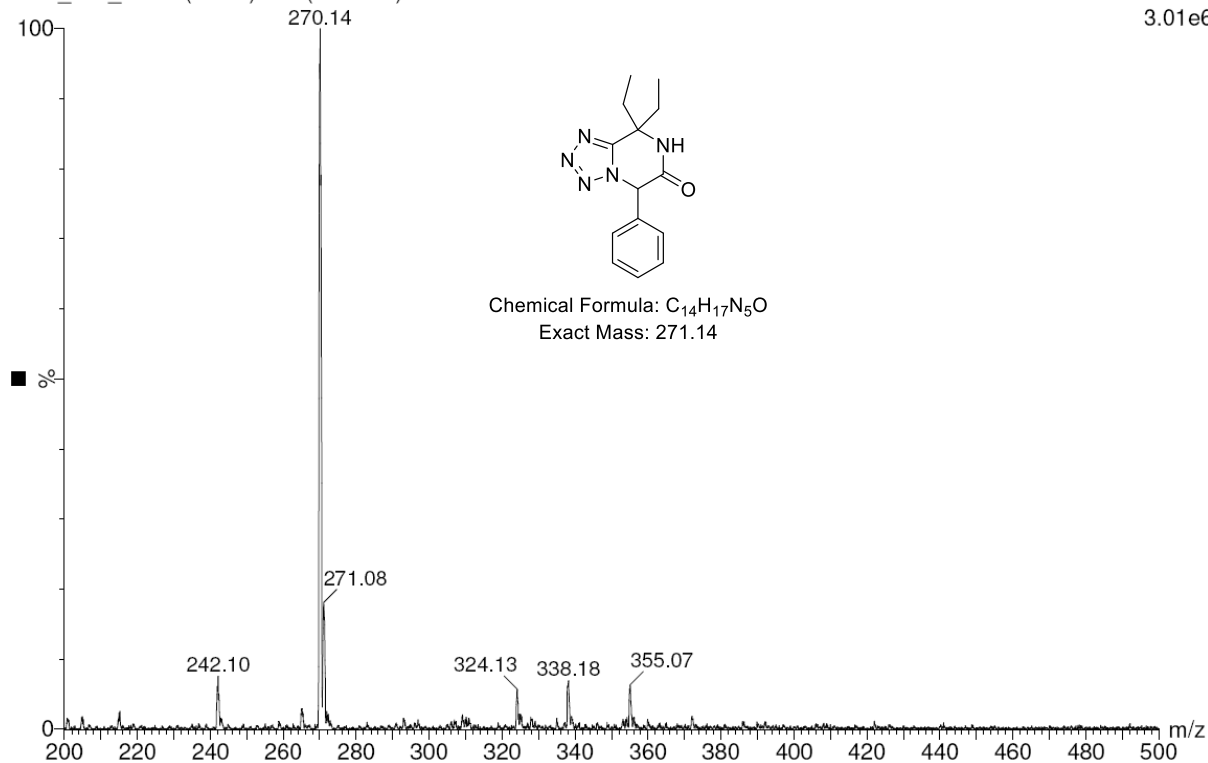

# 46c: 5'-phenyl-5'H-spiro[cyclohexane-1,8'-tetrazolo[1,5-a]pyrazin]-6'(7'H)-one

PHP661/1  
PHP661  
PROTON DMSO {C:\NMR data\DD} Patil 42

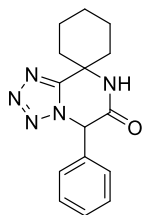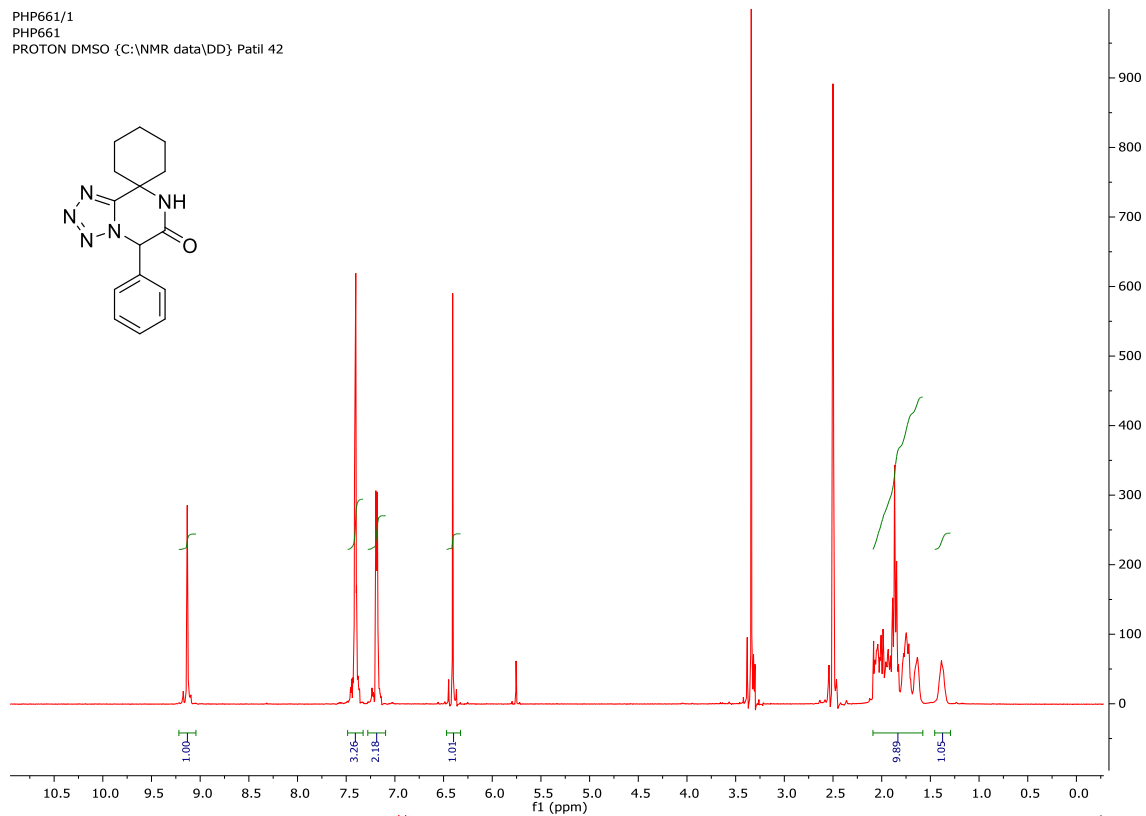

PHP661/2  
PHP661  
C13 DMSO {C:\NMR data\DD} Patil 8

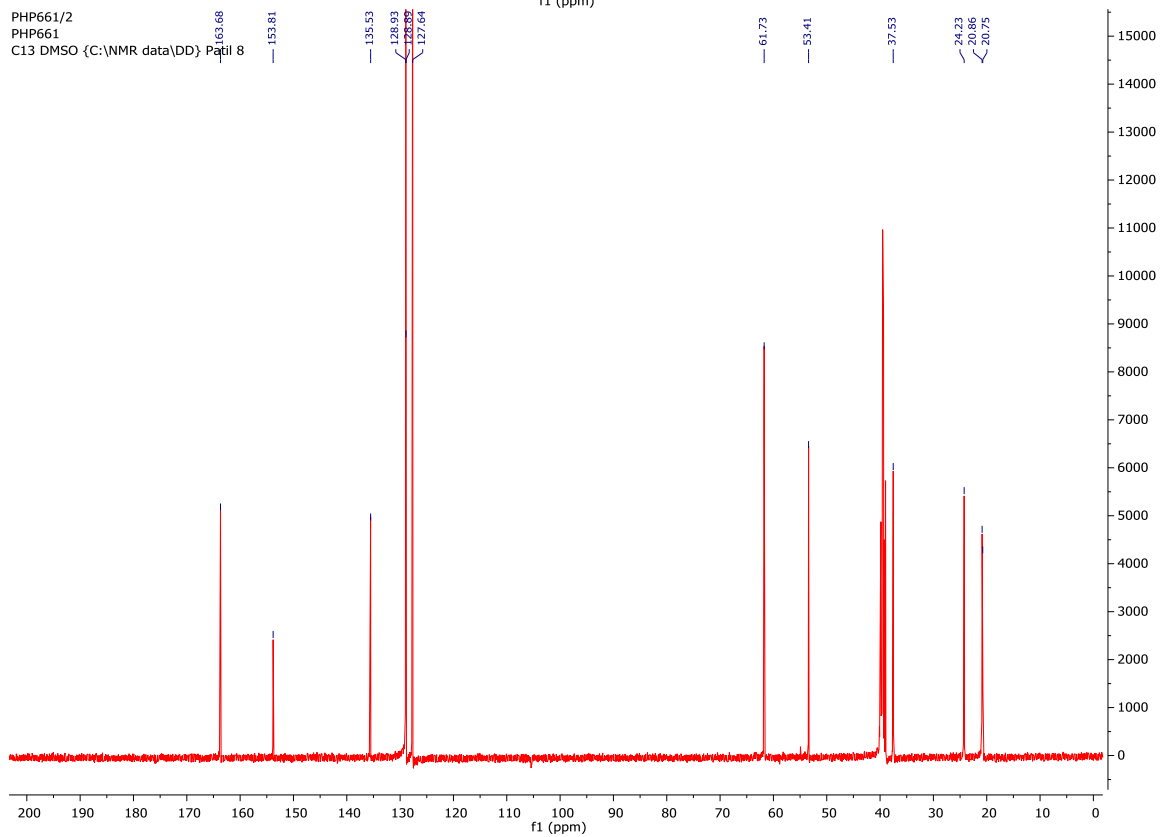



PHP\_661\_2\_Col3\_Sol1\_5-30%\_6min  
PHP\_661\_2

3: Diode Array  
Range: 1.762

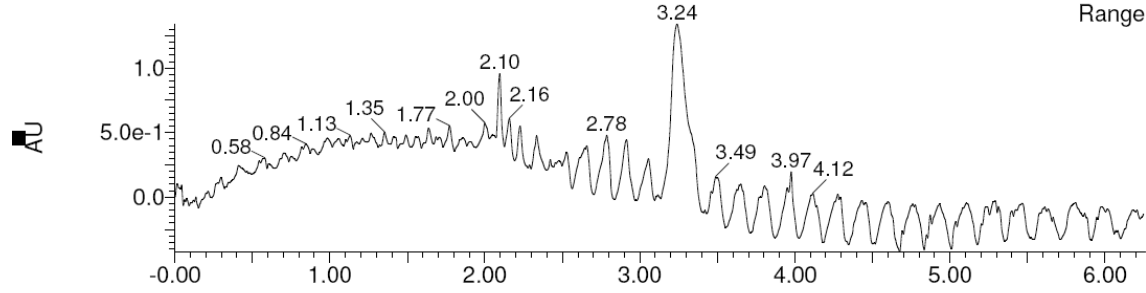

PHP\_661\_2

1: Scan ES+  
284  
4.44e7

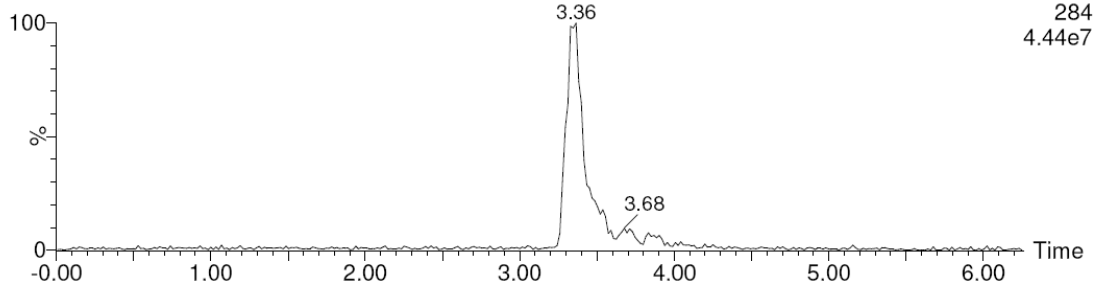

PHP\_661\_2\_Col3\_Sol1\_5-30%\_6min  
PHP\_661\_2 194 (3.372) Cm (189:201)

2: Scan ES-  
1.50e6

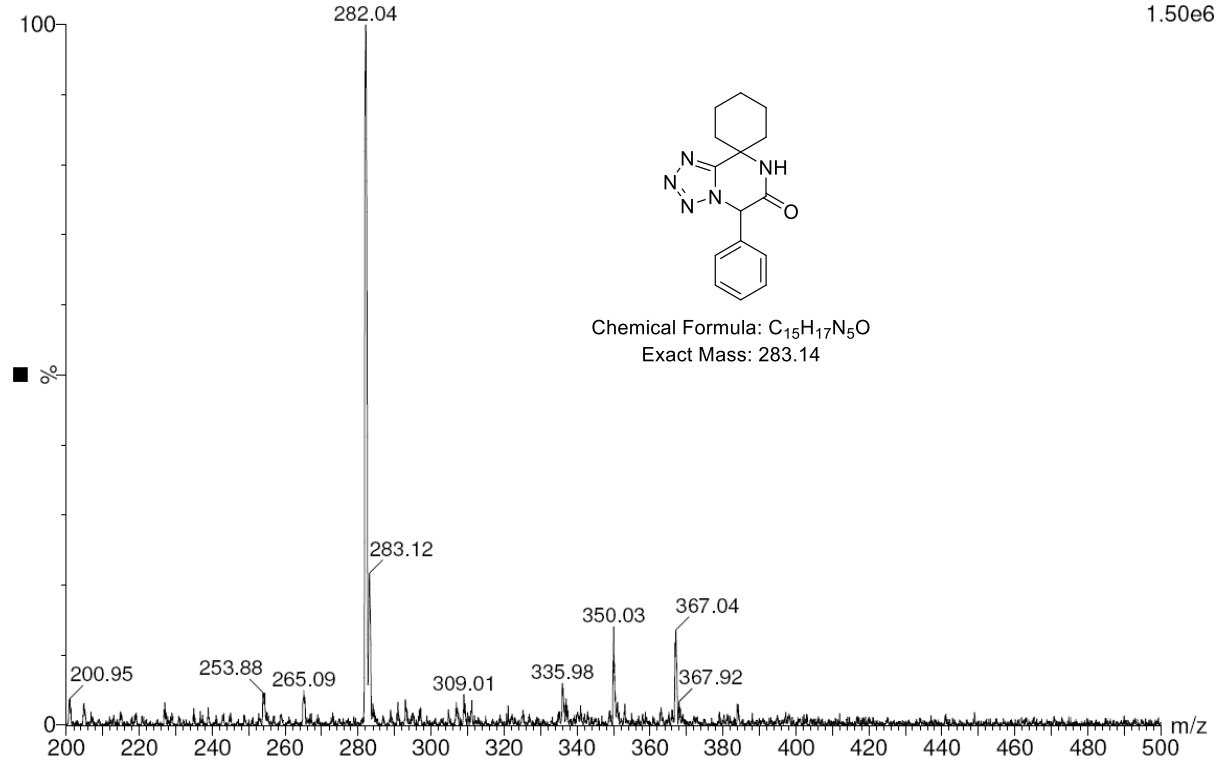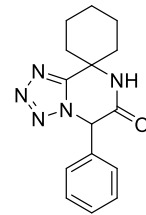

Chemical Formula: C<sub>15</sub>H<sub>17</sub>N<sub>5</sub>O  
Exact Mass: 283.14

# 47c: ethyl 6'-oxo-5'-phenyl-6',7'-dihydro-5'H-spiro[piperidine-4,8'-tetrazolo[1,5-a]pyrazine]-1-carboxylate

PHP664\_B/1  
PHP664\_B  
PROTON CDCl3 {C:\NMR data\DD} Patil 49

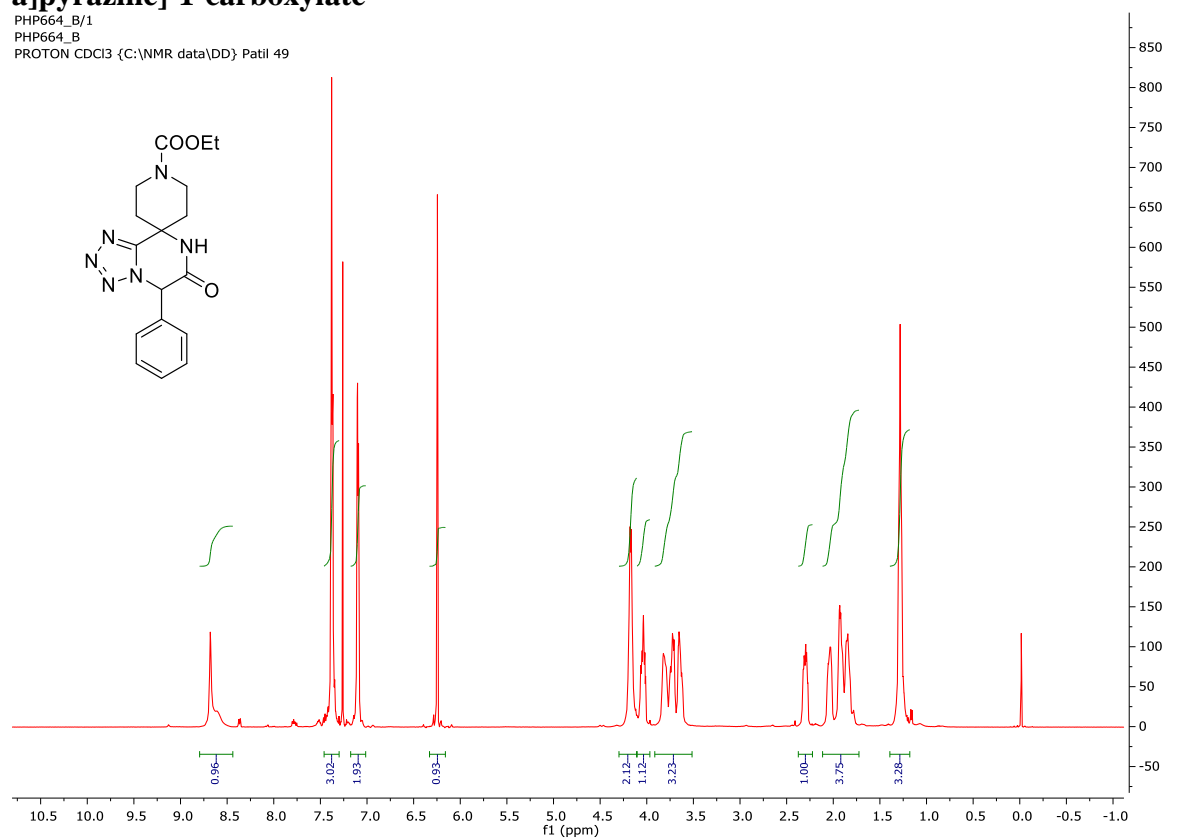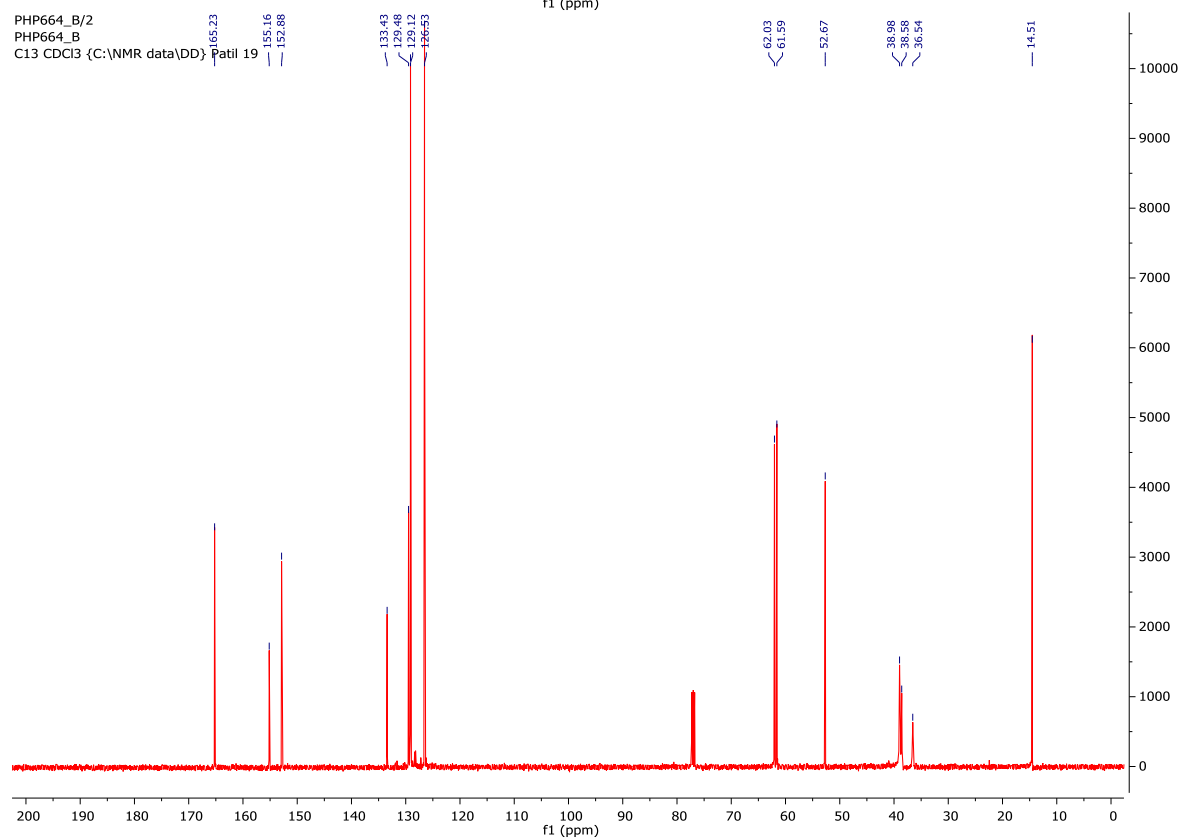

PHP\_664\_B\_2\_Col3\_Sol1\_5-30%\_6min

PHP\_664\_B\_2

3: Diode Array  
Range: 2.303

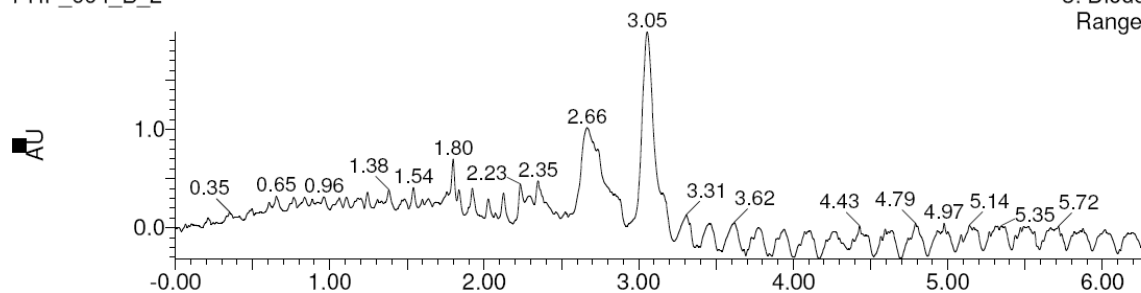

PHP\_664\_B\_2

1: Scan ES+  
357  
4.43e7

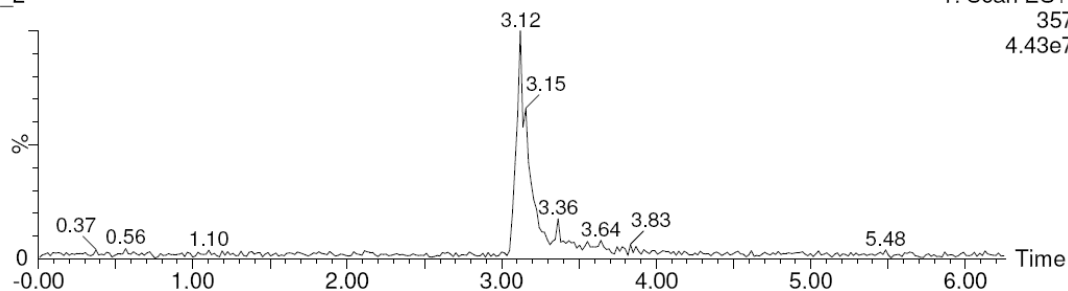

PHP\_664\_B\_2\_Col3\_Sol1\_5-30%\_6min

PHP\_664\_B\_2 181 (3.137) Cm (176:188)

1: Scan ES+  
1.60e7

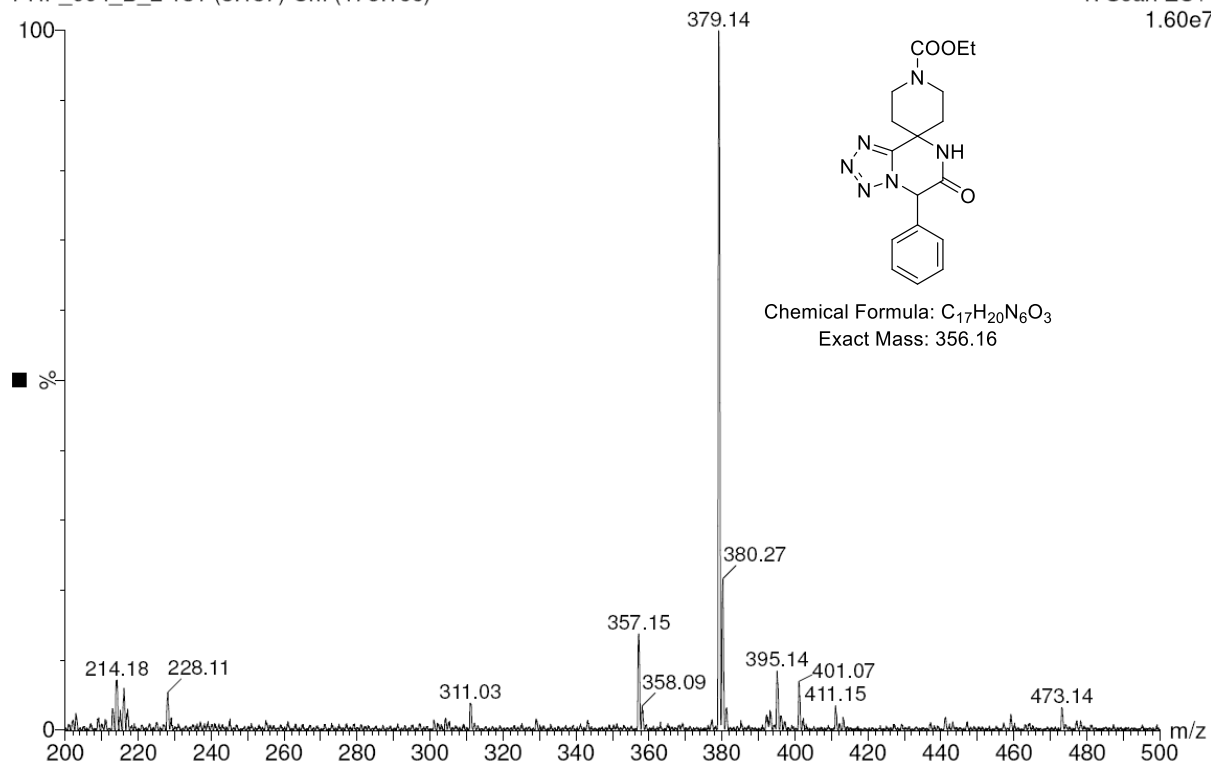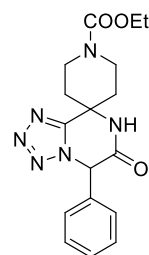

Chemical Formula: C<sub>17</sub>H<sub>20</sub>N<sub>6</sub>O<sub>3</sub>  
Exact Mass: 356.16

# 48c: 1-benzyl-5'-phenyl-5'H-spiro[piperidine-4,8'-tetrazolo[1,5-a]pyrazin]-6'(7'H)-one

PHP\_Ph\_6/1  
PHP\_Ph\_6  
PROTON CDCl3 {C:\NMR data\DD} Patil 53

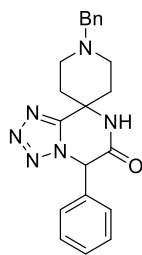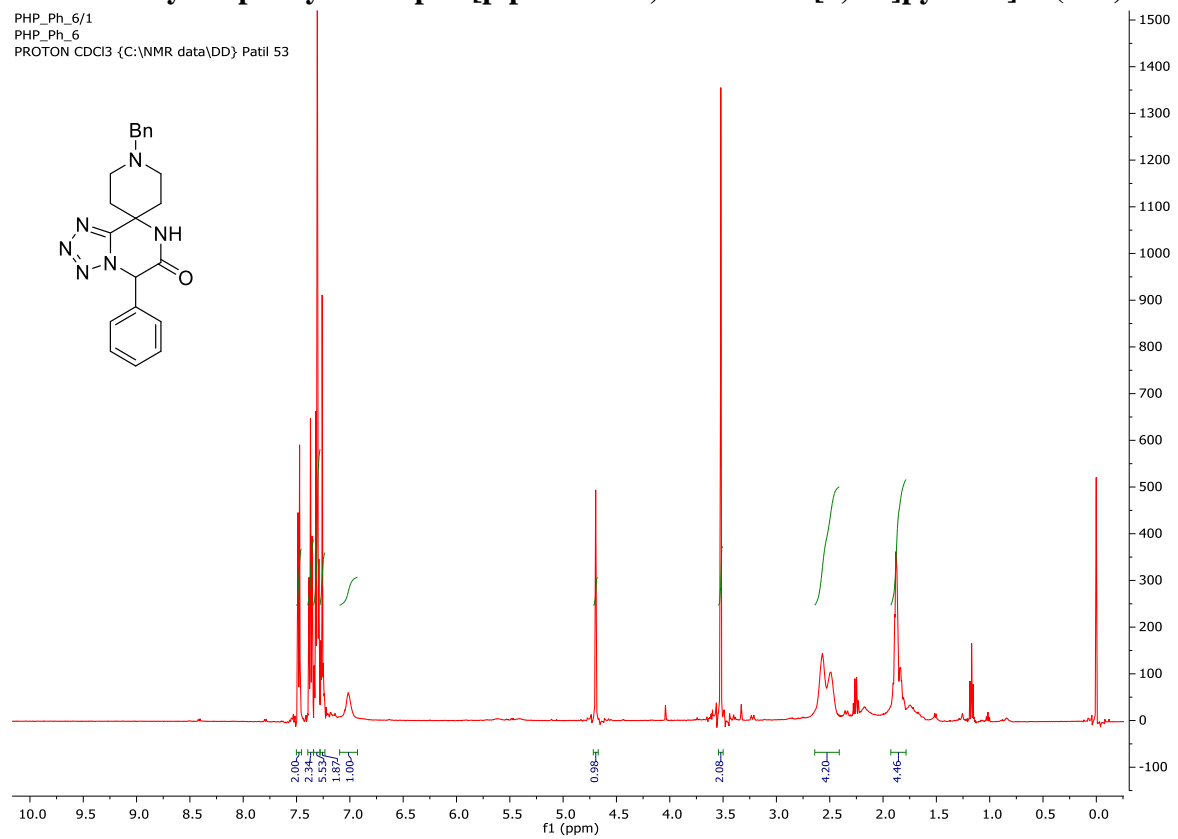

PHP\_Ph\_6/2  
PHP\_Ph\_6  
C13 CDCl3 {C:\NMR data\DD} Patil 15

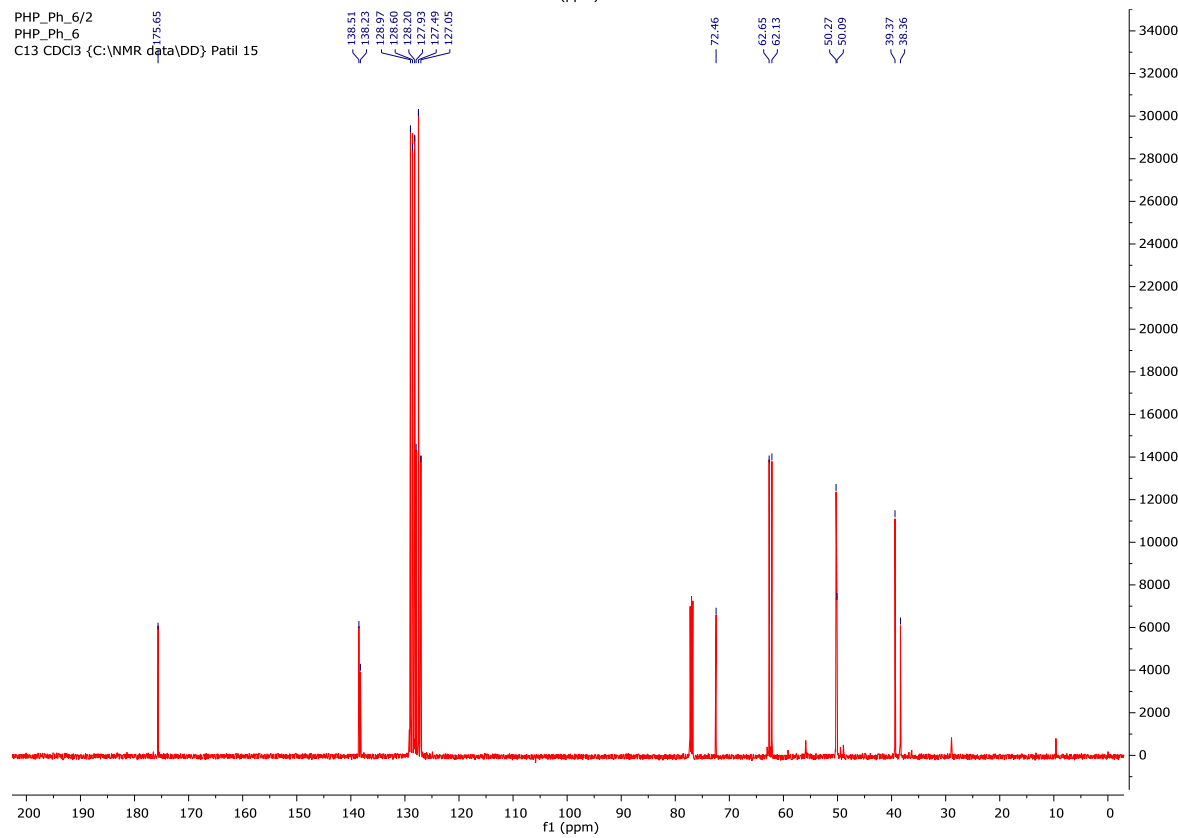

PHP\_Ph-6\_cr1\_Col3\_Sol1\_5-30%\_6min

PHP\_Ph-6\_cr1

3: Diode Array  
Range: 1.091

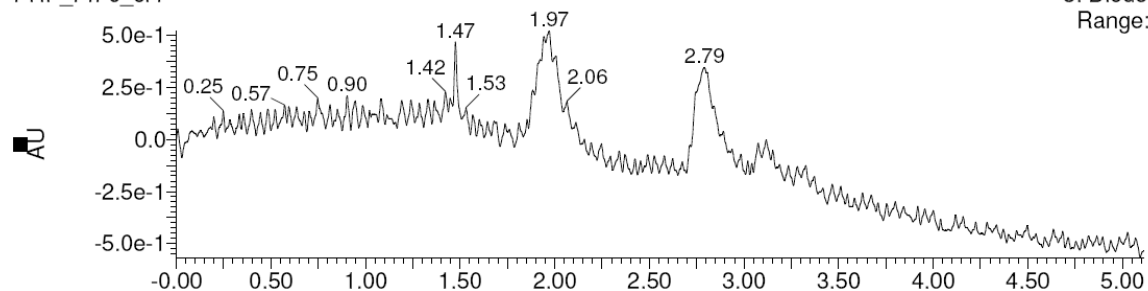

PHP\_Ph-6\_cr1

1: Scan ES+  
375  
8.49e7

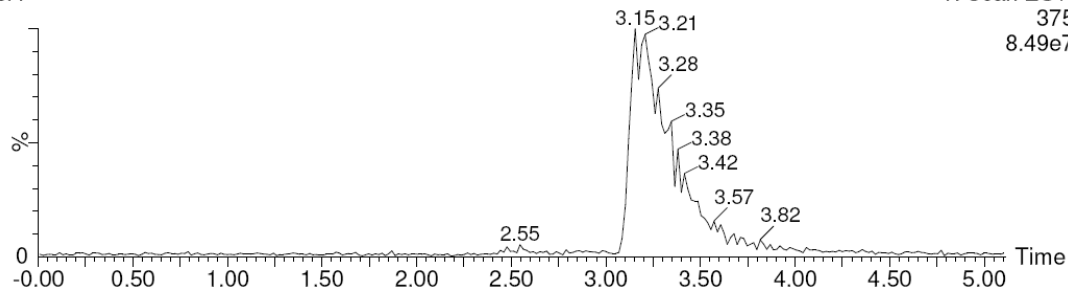

PHP\_Ph-6\_cr1\_Col3\_Sol1\_5-30%\_6min

PHP\_Ph-6\_cr1 185 (3.207) Cm (181:198)

1: Scan ES+  
375.23 7.17e6

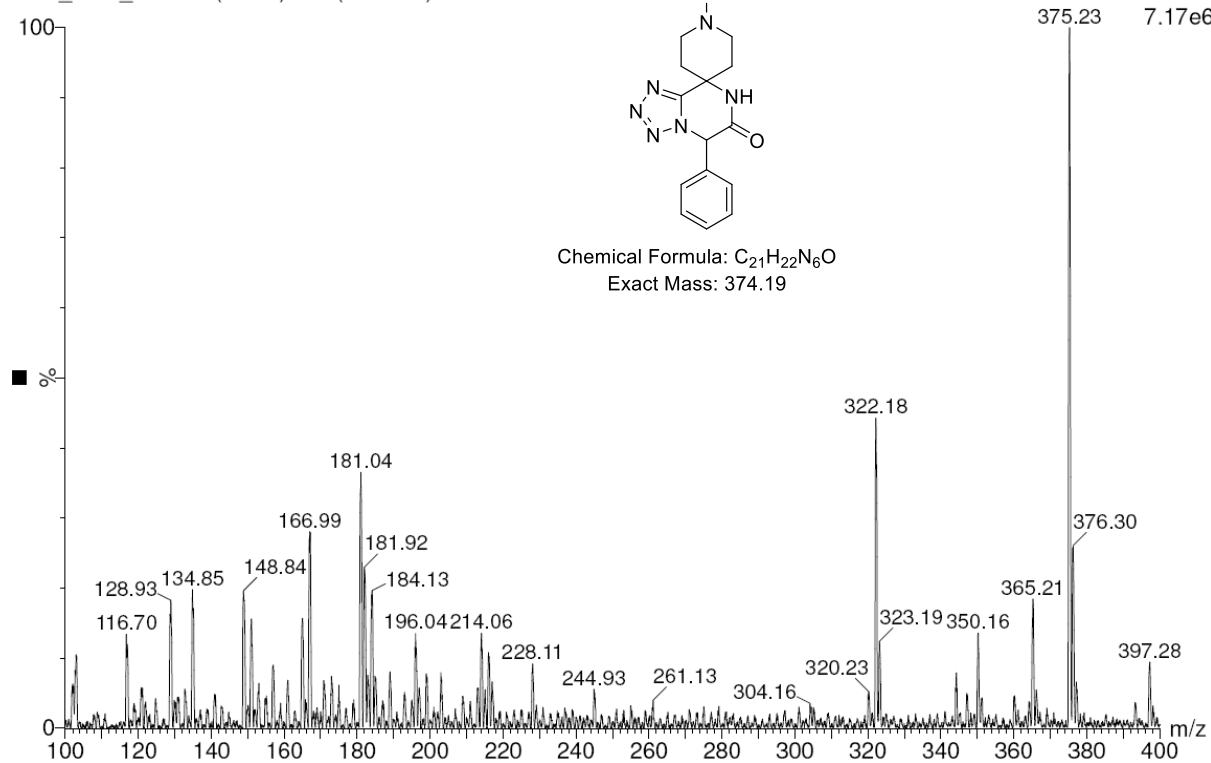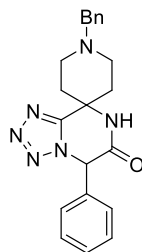

Chemical Formula: C<sub>21</sub>H<sub>22</sub>N<sub>6</sub>O  
Exact Mass: 374.19

# 50c: 5-benzyl-8,8-dimethyl-7,8-dihydro-1H-tetrazolo[1,5-a]pyrazin-6(5H)-one

PHP665  
PROTON CDCl3 {C:\NMR data\DD} Patil 1

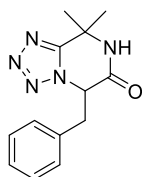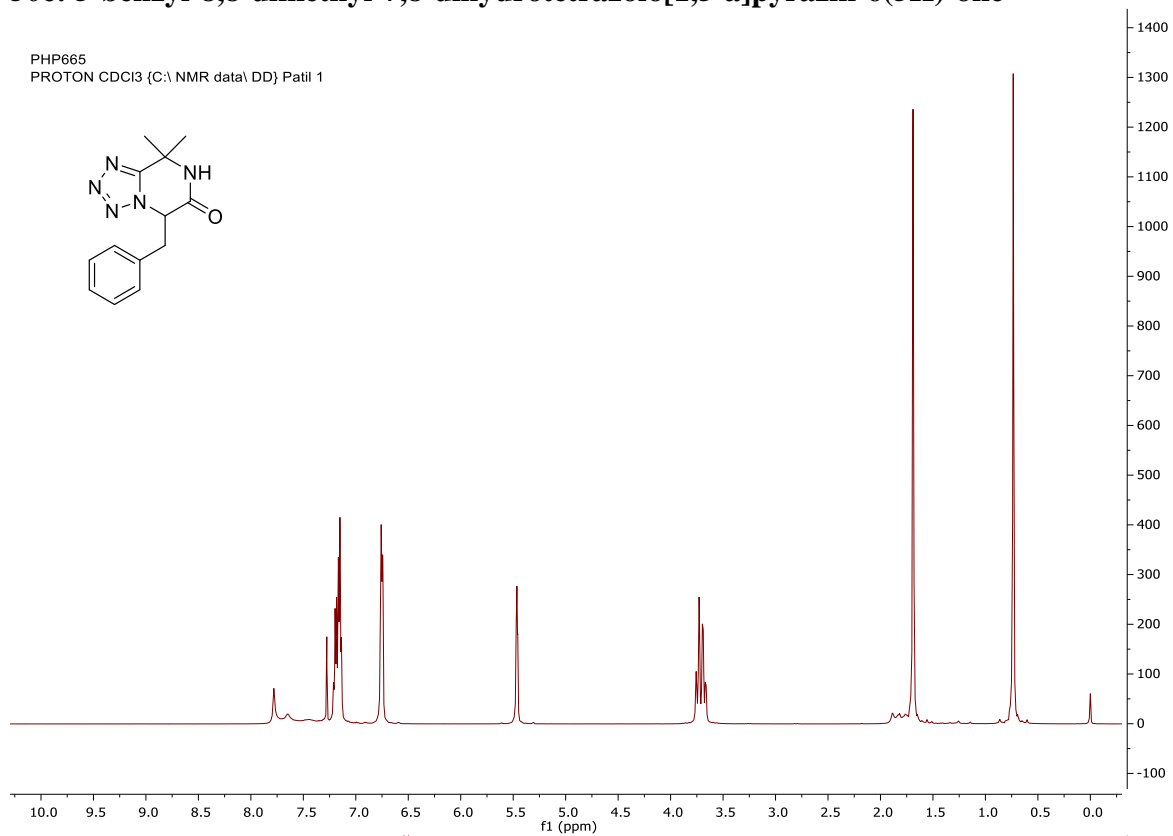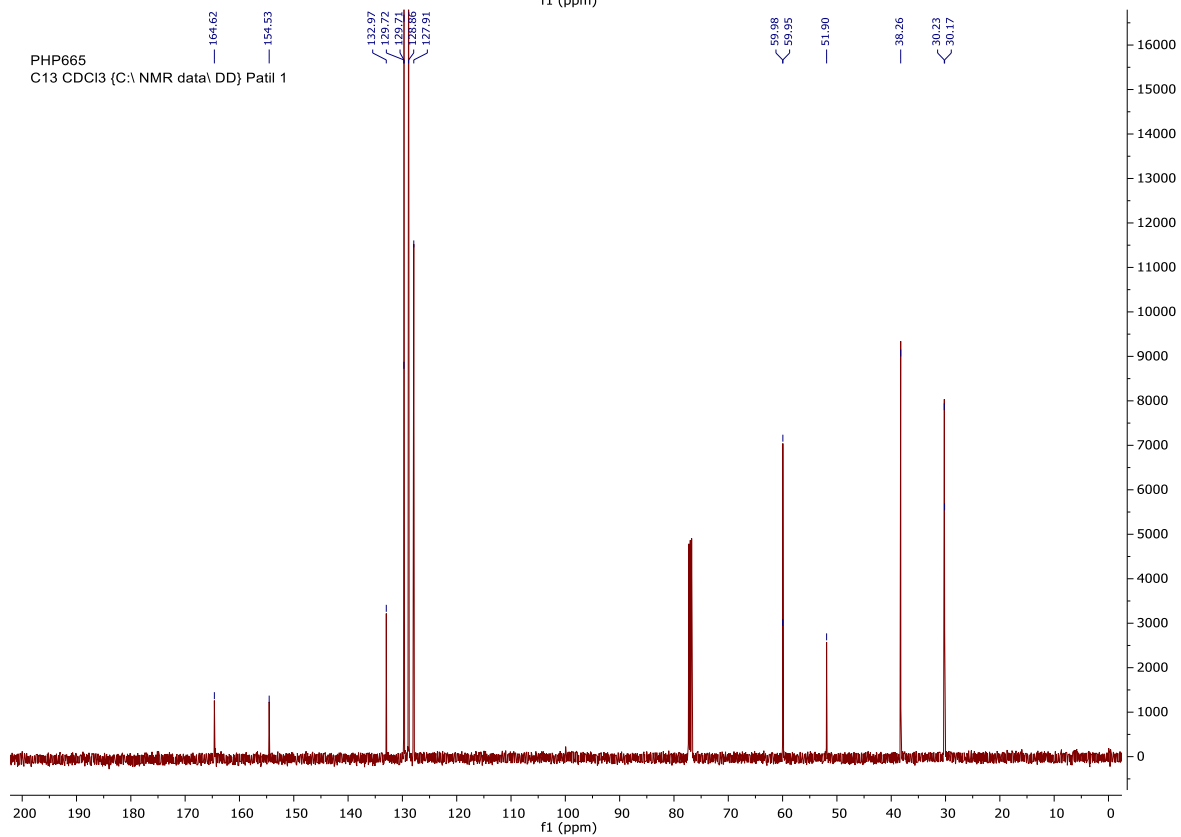

PHP665\_1\_Col3\_Sol1\_5-30%\_6min

PHP665\_1

3: Diode Array  
Range: 2.663

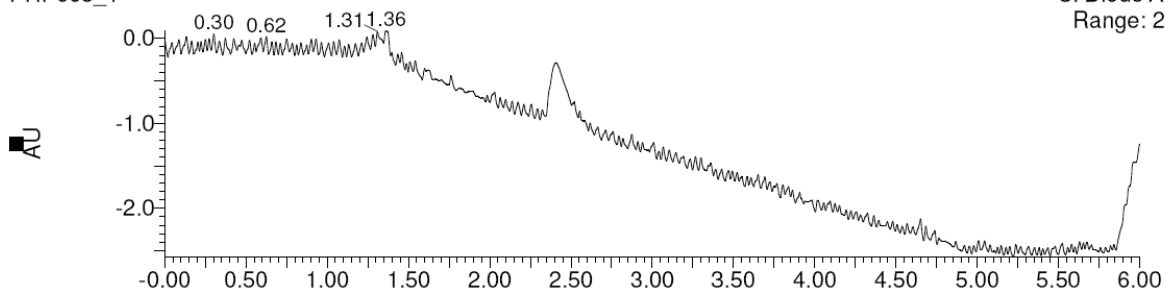

PHP665\_1

2: Scan ES-  
256  
2.28e6

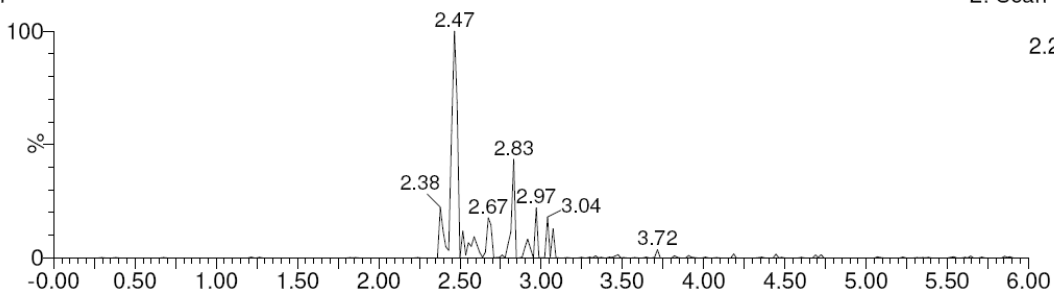

PHP665\_1\_Col3\_Sol1\_5-30%\_6min

PHP665\_1 141 (2.448)

2: Scan ES-  
1.28e6

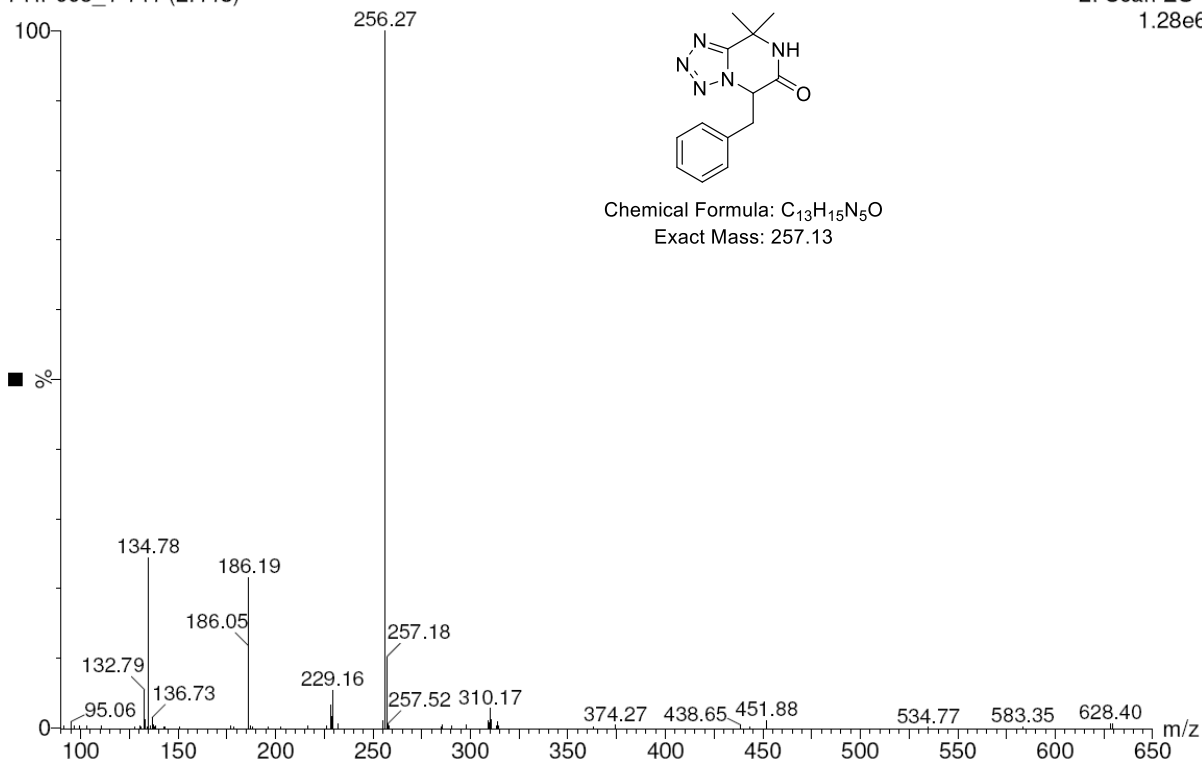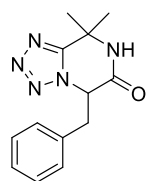

Chemical Formula: C<sub>13</sub>H<sub>15</sub>N<sub>5</sub>O  
Exact Mass: 257.13

# 51c: 5-benzyl-8-ethyl-8-methyl-7,8-dihydro-tetrazolo[1,5-a]pyrazin-6(5H)-one

PHP666/1  
PHP666  
PROTON CDCl3 {C:\NMR data\DD} Patil 9

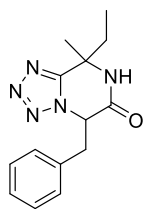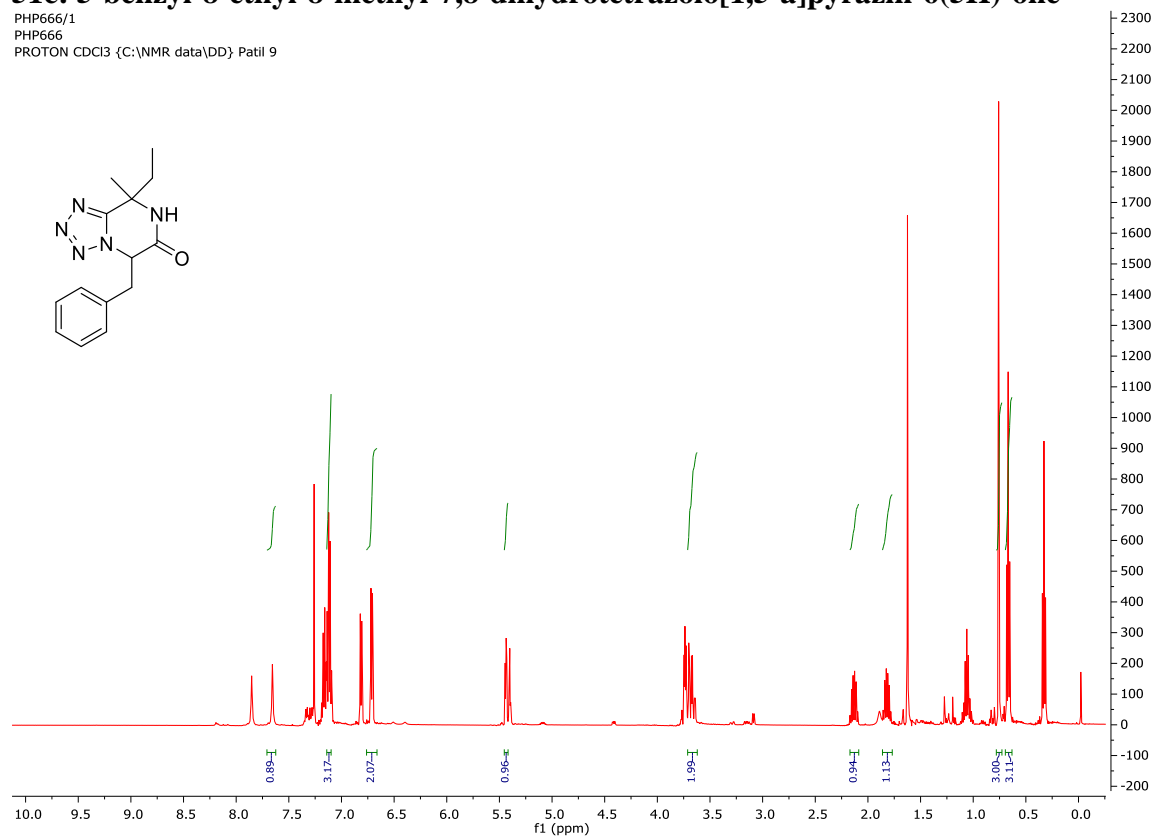

PHP666/2  
PHP666  
C13 CDCl3 {C:\NMR data\DD} Patil 9

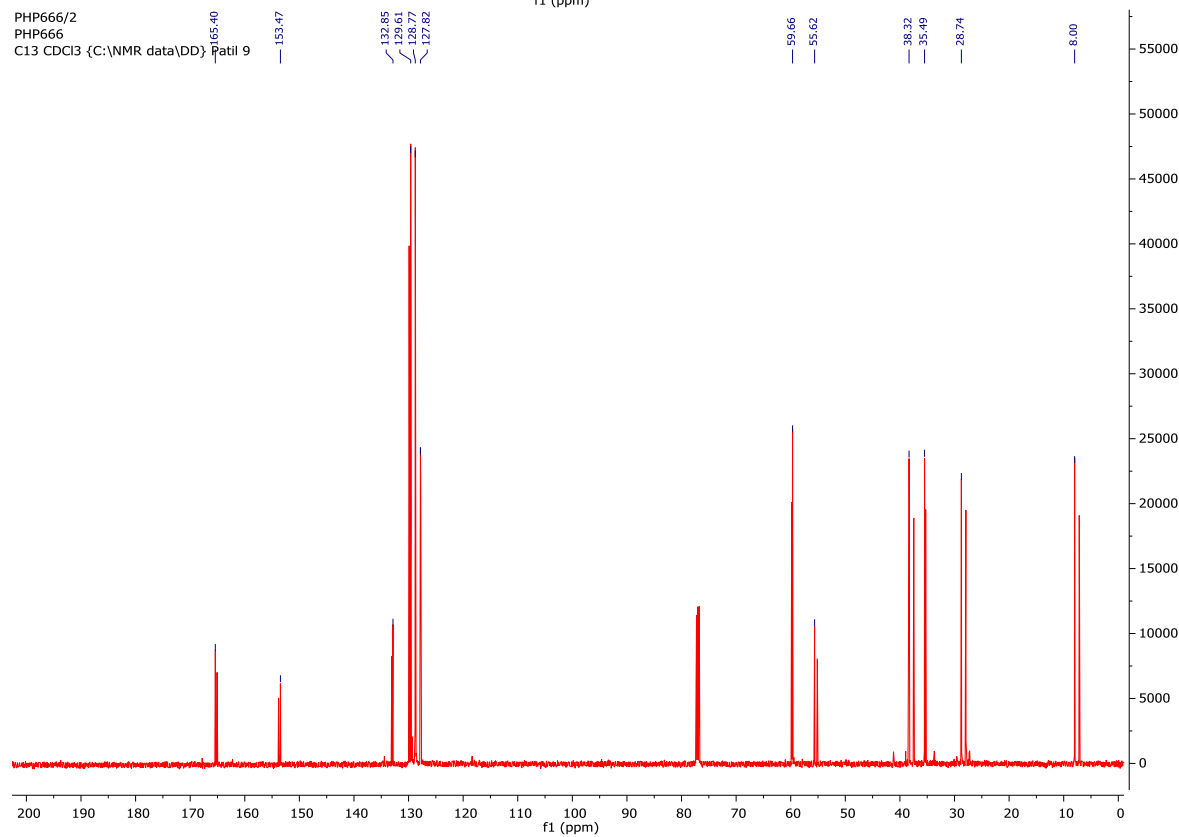



PHP\_666\_2\_Col3\_Sol1\_5-30%\_6min

PHP\_666\_2

3: Diode Array  
Range: 1.608

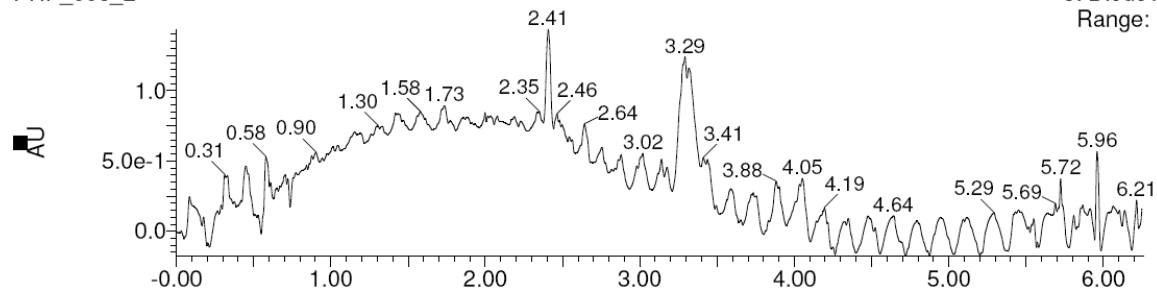

PHP\_666\_2

2: Scan ES-  
270  
5.71e7

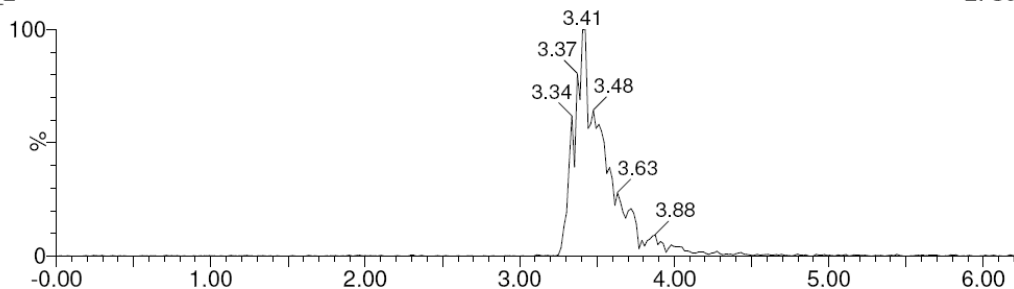

PHP\_666\_2\_Col3\_Sol1\_5-30%\_6min

PHP\_666\_2 197 (3.424) Cm (192:211)

2: Scan ES-  
3.11e6

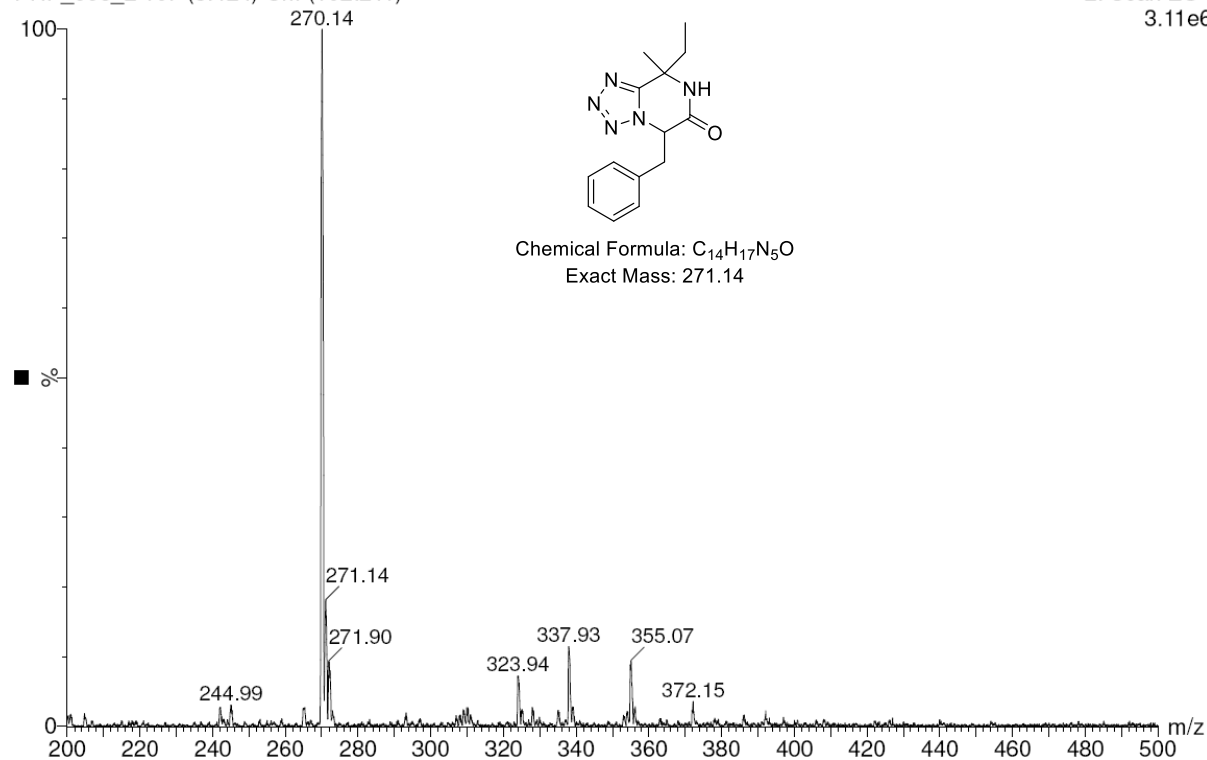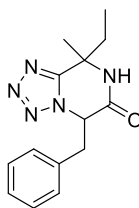

Chemical Formula: C<sub>14</sub>H<sub>17</sub>N<sub>5</sub>O  
Exact Mass: 271.14

# 52c: 5'-benzyl-5'H-spiro[cyclohexane-1,8'-tetrazolo[1,5-a]pyrazin]-6'(7'H)-one

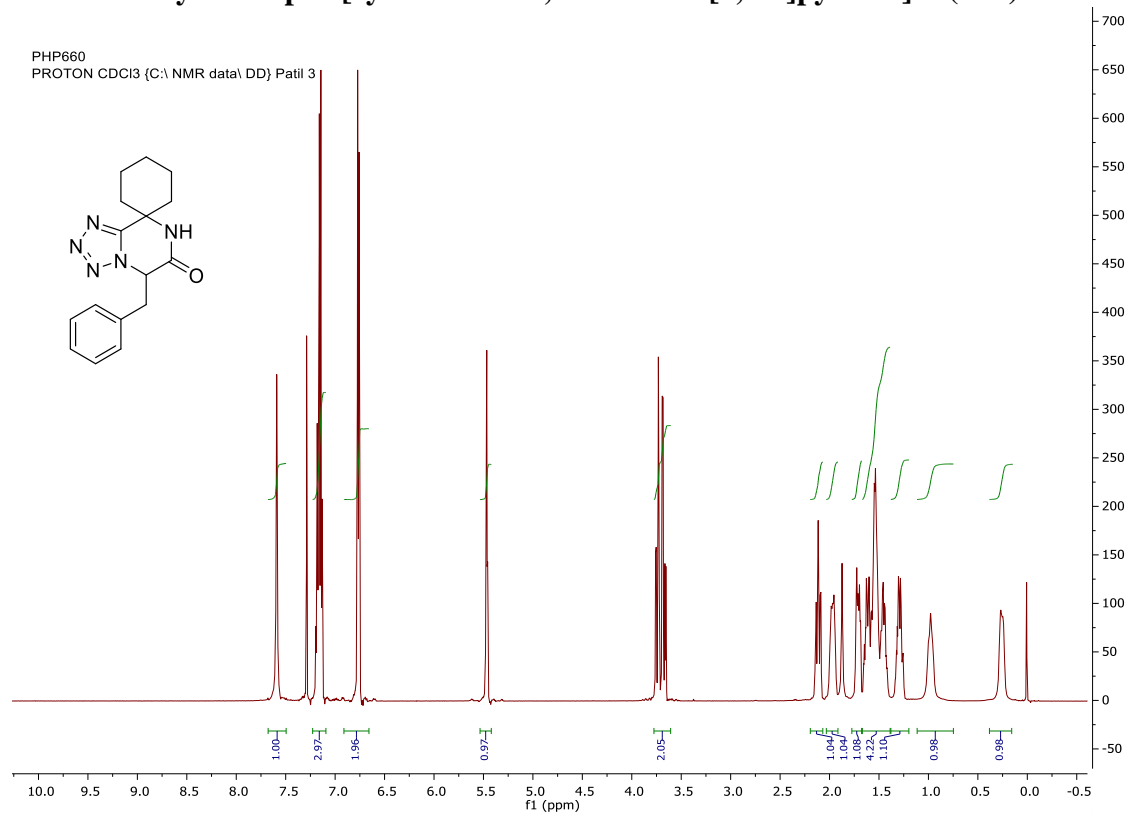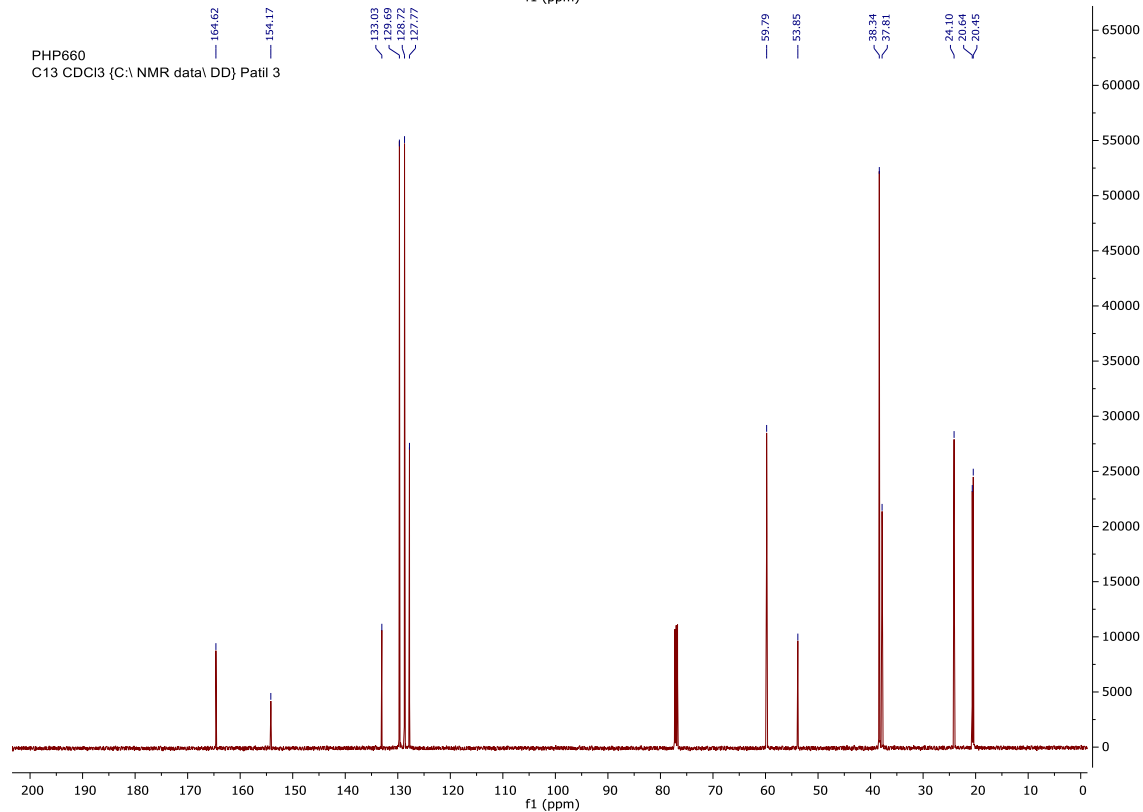

PHP660\_1\_Col3\_Sol1\_5-30%\_6min

PHP660\_1

3: Diode Array  
Range: 2.738

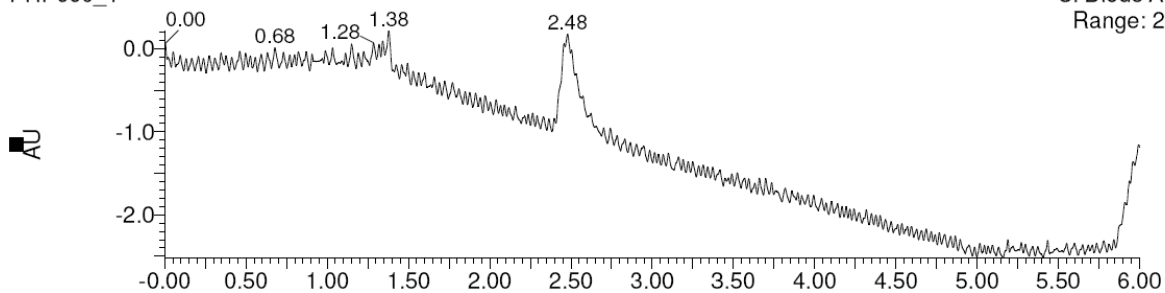

PHP660\_1

1: Scan ES+  
298  
6.60e5

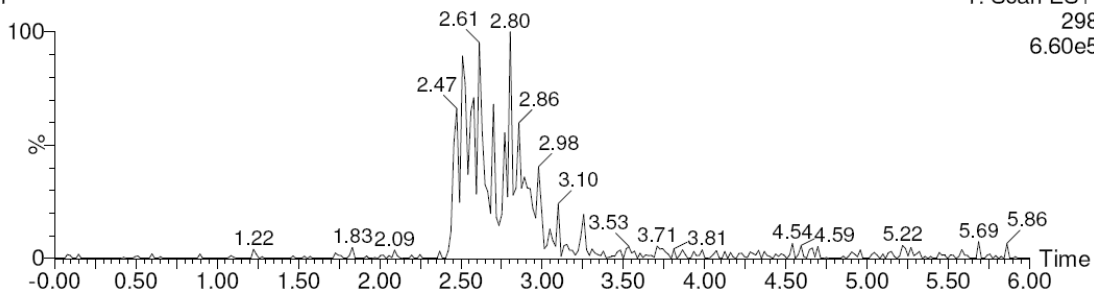

PHP660\_1 146 (2.527)

1: Scan ES+  
3.76e5

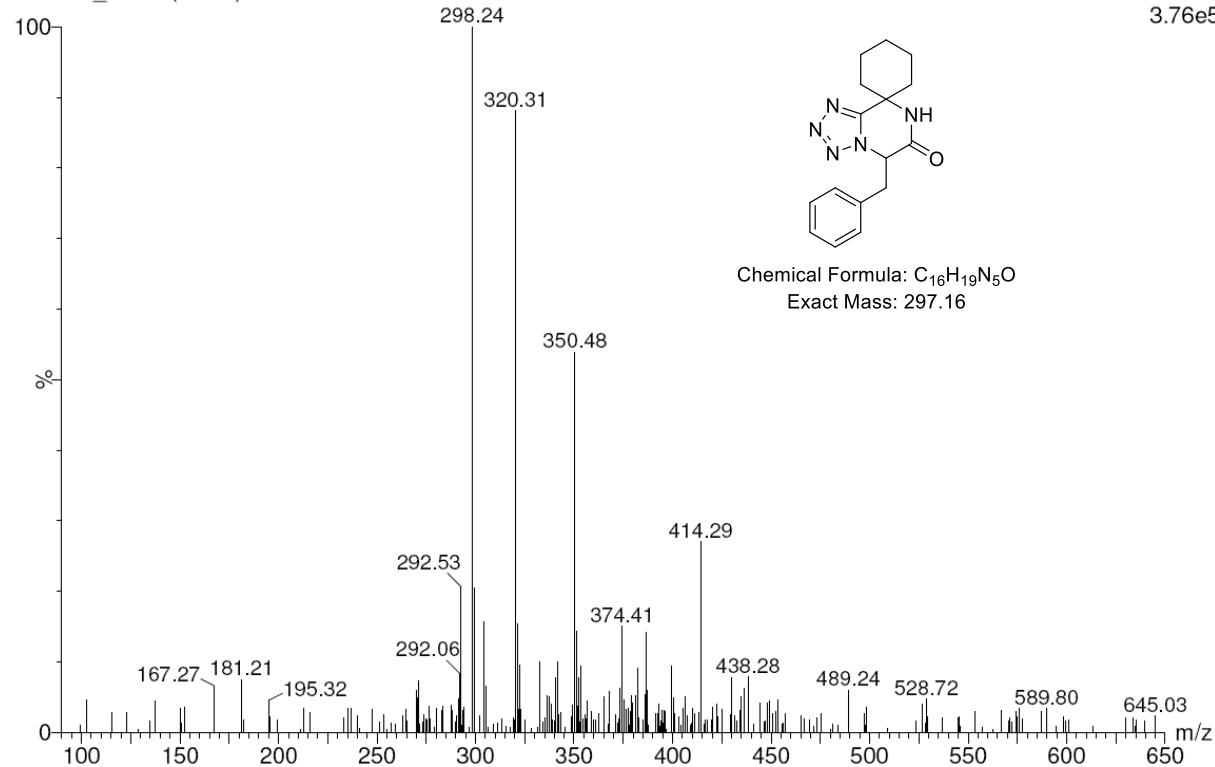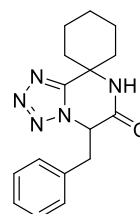

Chemical Formula: C<sub>16</sub>H<sub>19</sub>N<sub>5</sub>O  
Exact Mass: 297.16

**53c: 5'-benzyl-4-phenyl-5'H-spiro[cyclohexane-1,8'-tetrazolo[1,5-a]pyrazin]-6'(7'H)-one**

PHP658  
 PROTON CDCl<sub>3</sub> (C:\NMR data\ DD) Patil 1

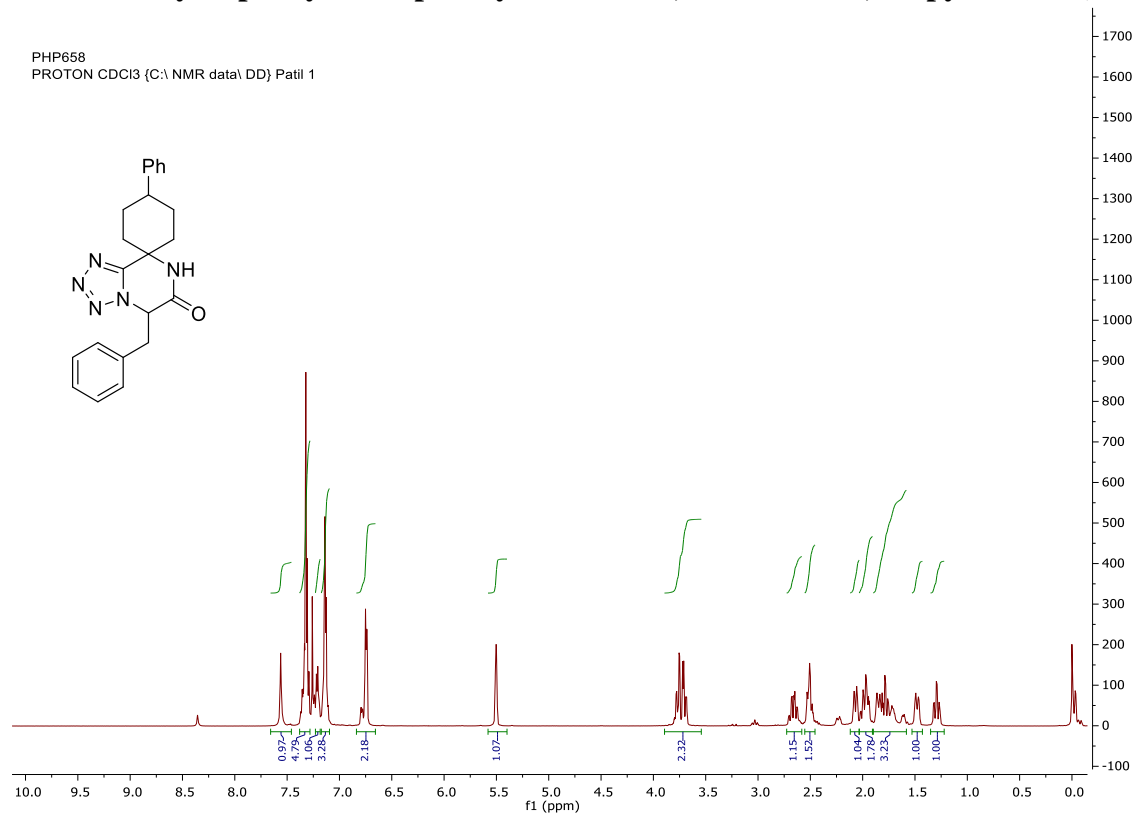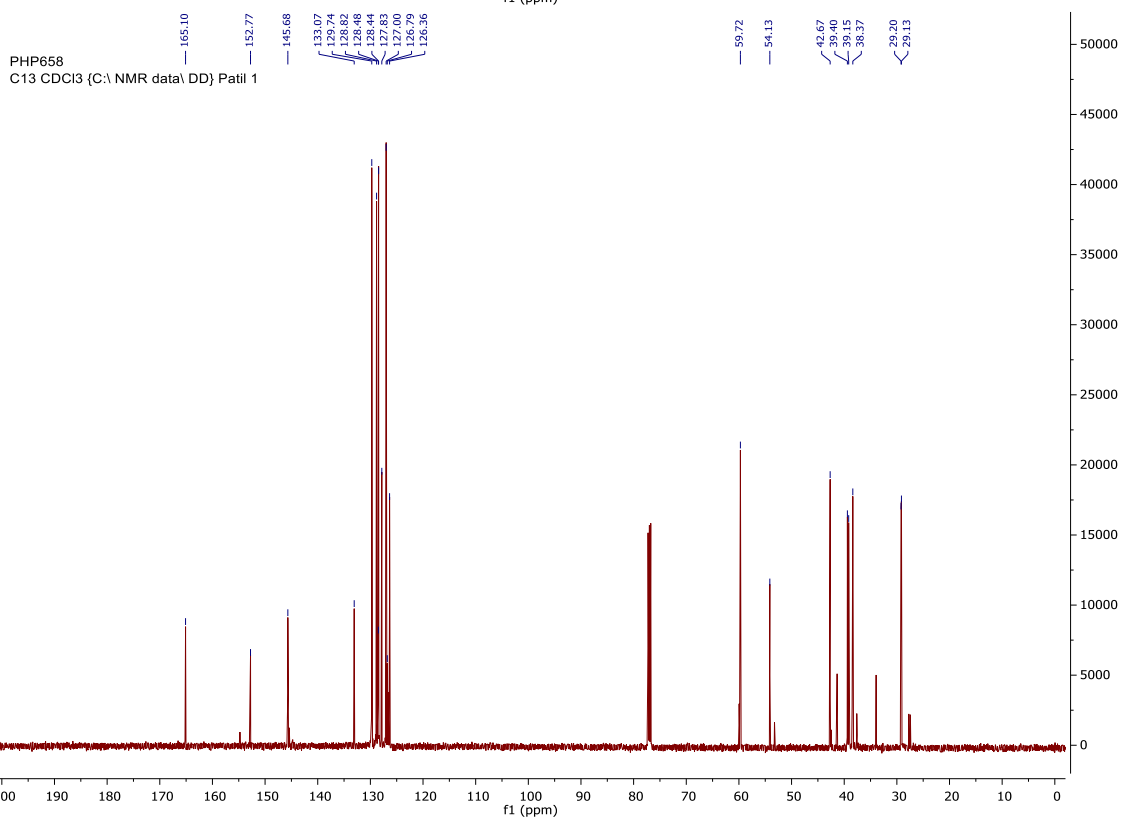

PHP658\_1\_Col3\_Sol1\_5-30%\_6min

PHP658\_1

3: Diode Array  
Range: 2.989

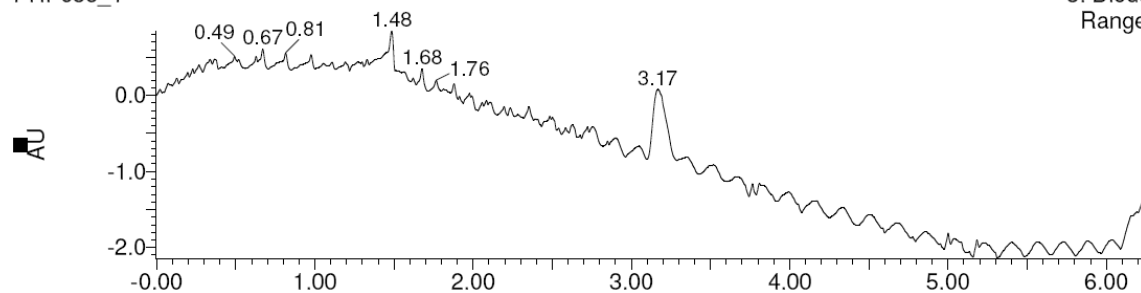

PHP658\_1

2: Scan ES-  
372  
5.42e6

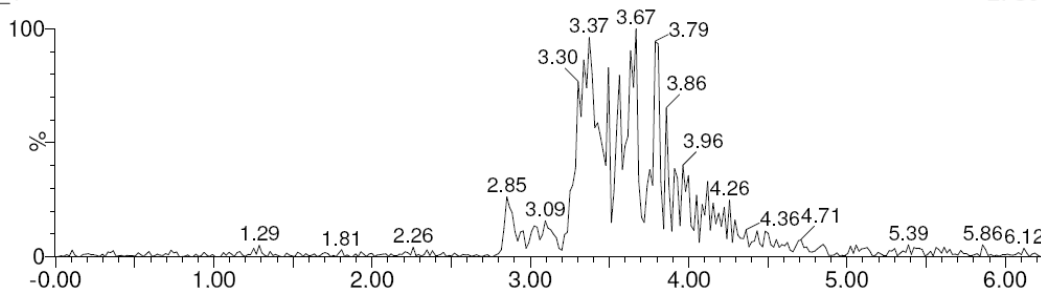

PHP658\_1\_Col3\_Sol1\_5-30%\_6min

PHP658\_1 211 (3.668) Cm (189:232)

2: Scan ES-  
3.22e5

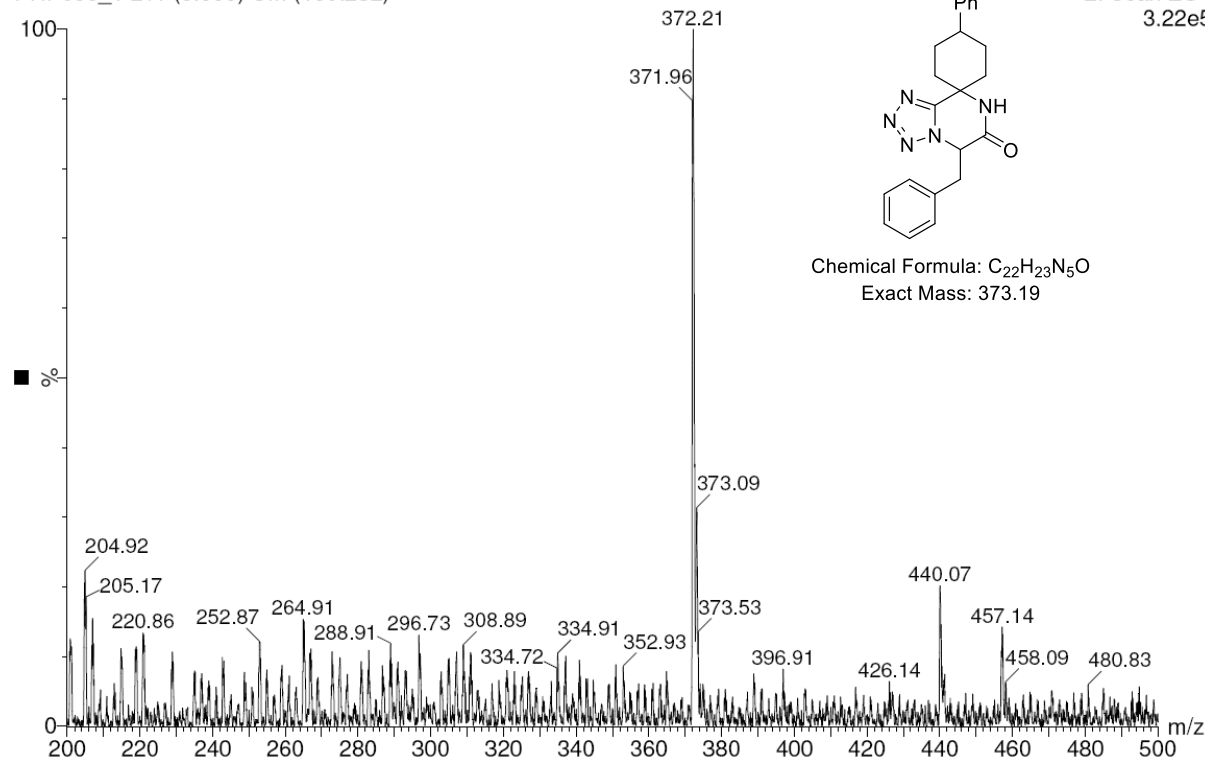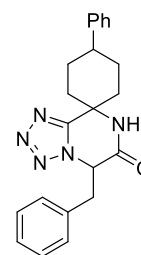

Chemical Formula: C<sub>22</sub>H<sub>23</sub>N<sub>5</sub>O  
Exact Mass: 373.19

# 54c: 5'-benzyl-1-methyl-5'H-spiro[piperidine-4,8'-tetrazolo[1,5-a]pyrazin]-6'(7'H)-one

PHP\_Bn\_11/10  
PHP\_Bn\_11  
PROTON DMSO {C:\NMR data\DD} Patil 12

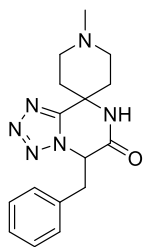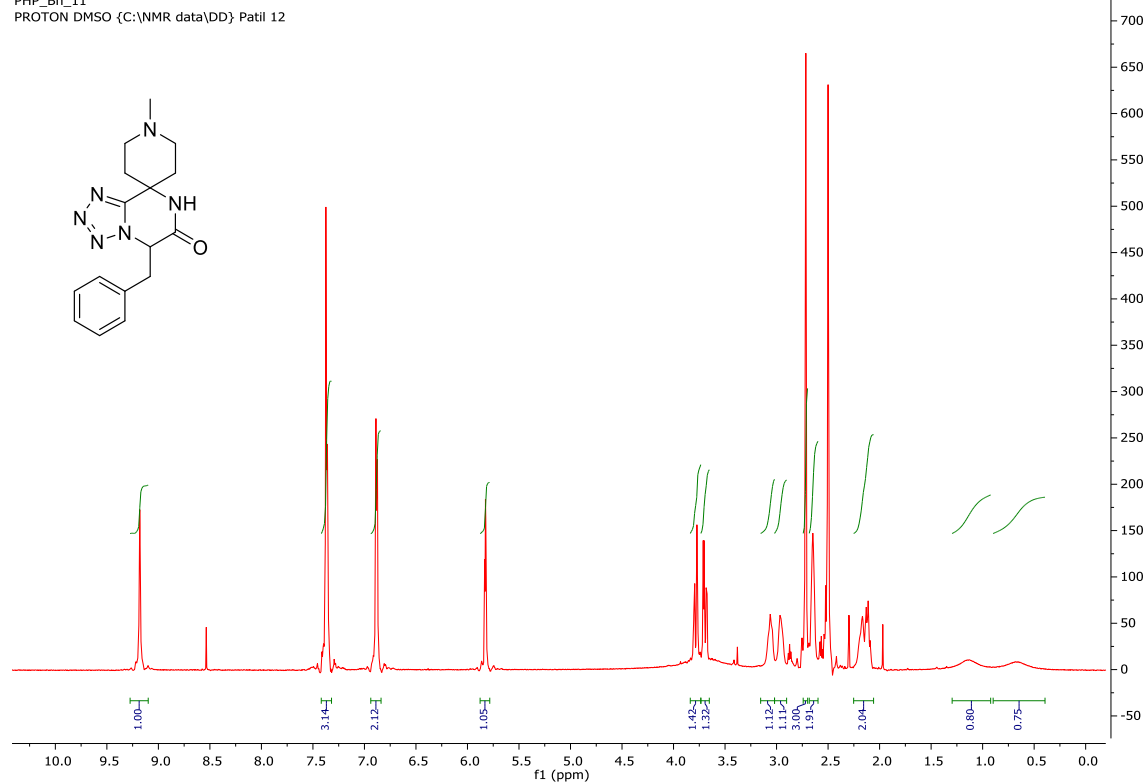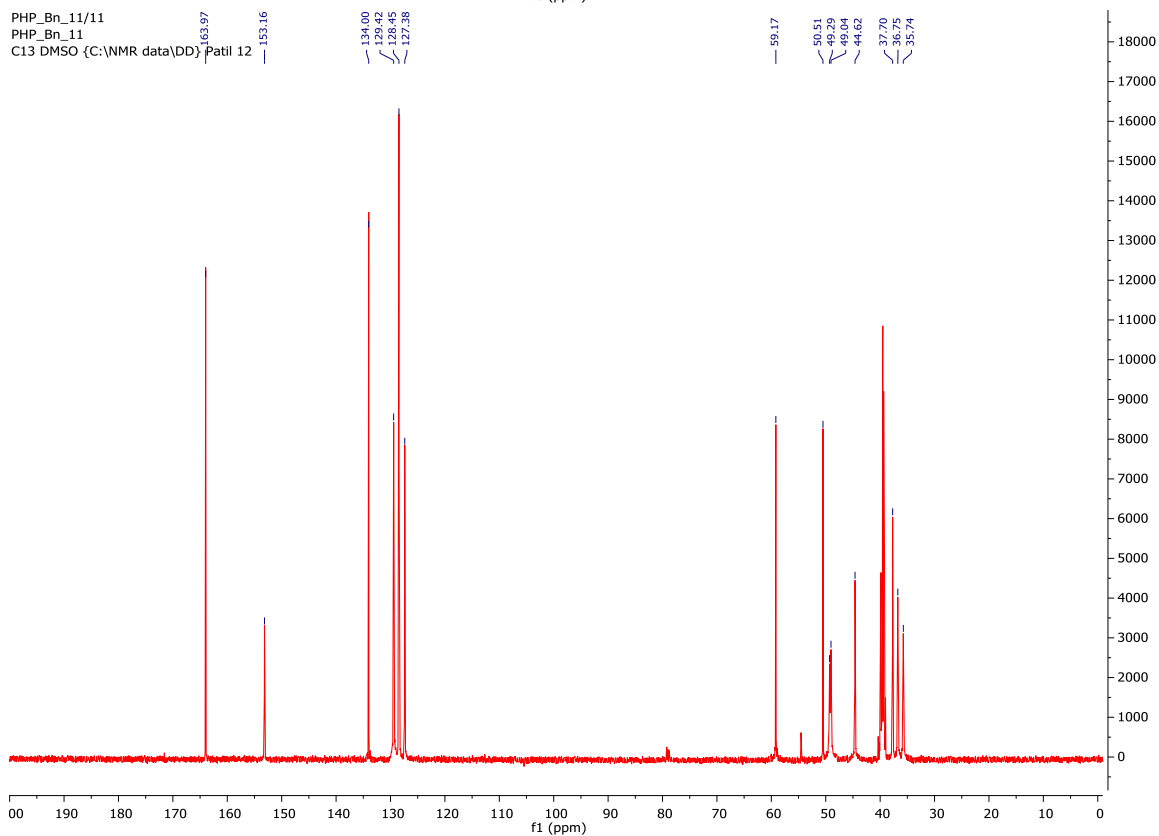

PHP\_Bn-11\_2\_Col3\_Sol1\_5-30%\_6min

PHP\_Bn-11\_2

3: Diode Array  
Range: 1.755

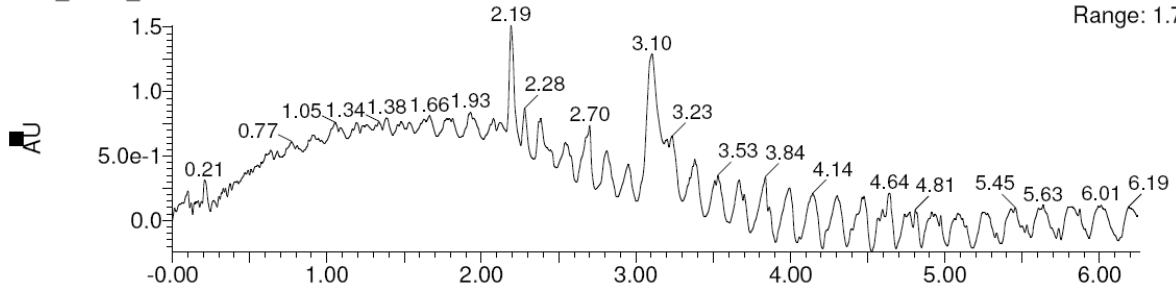

PHP\_Bn-11\_2

1: Scan ES+  
313  
1.28e9

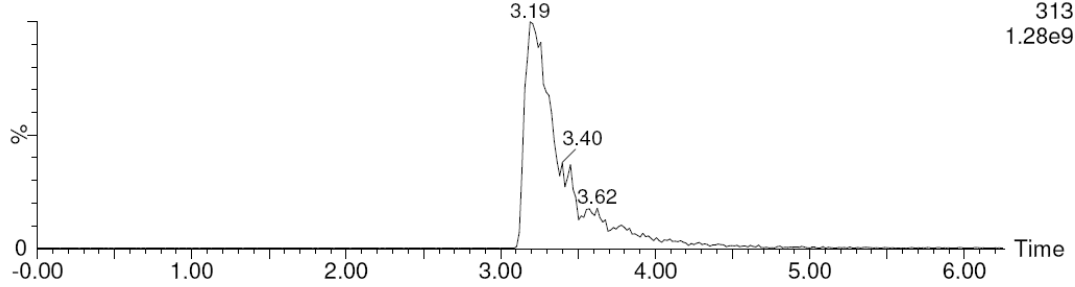

PHP\_Bn-11\_2\_Col3\_Sol1\_5-30%\_6min

PHP\_Bn-11\_2 184 (3.190) Cm (181:202)

1: Scan ES+  
8.55e7

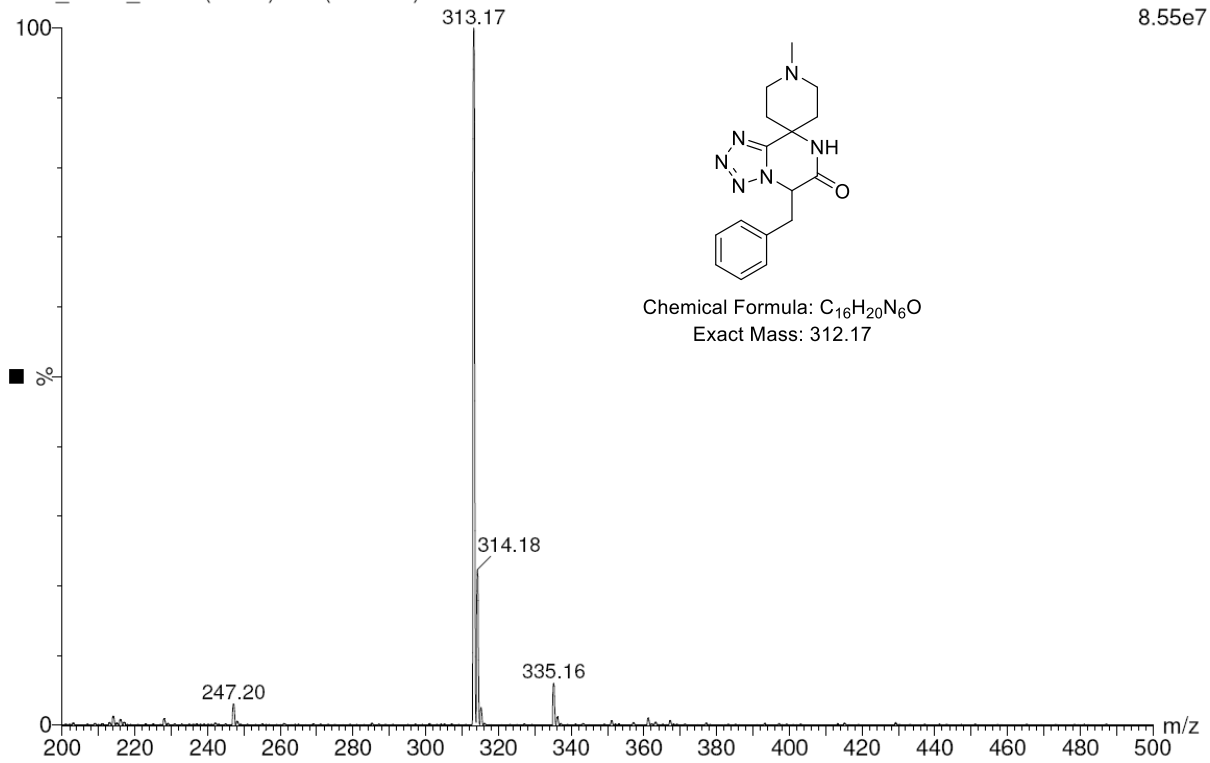

**55c: 1,5'-dibenzyl-5'H-spiro[piperidine-4,8'-tetrazolo[1,5-a]pyrazin]-6'(7'H)-one**

PHP\_Bn\_6.4.fid  
 PHP\_Bn\_6  
 PROTON CDCl3 {C:\NMR data\DD} Patil 2

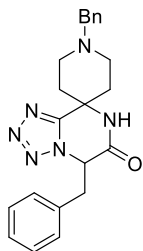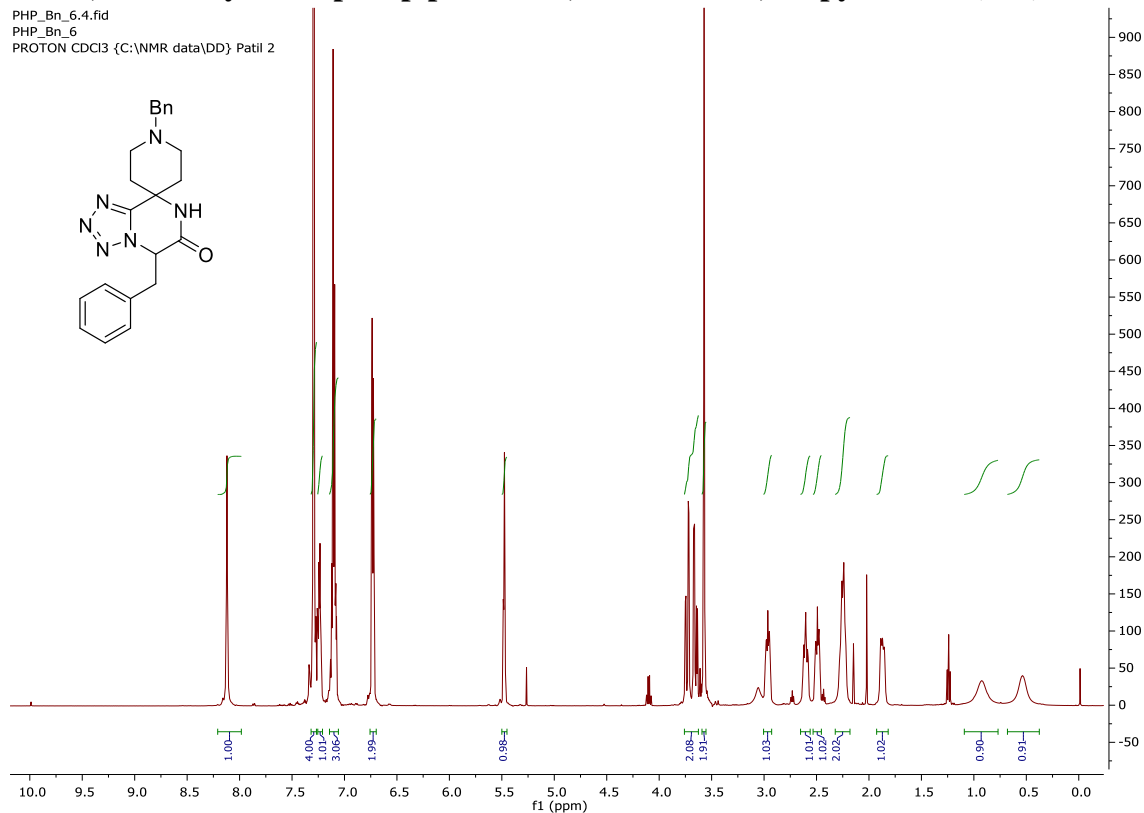

PHP\_Bn\_6/3  
 PHP\_Bn\_6  
 C13 CDCl3 {C:\NMR data\DD} Patil 14

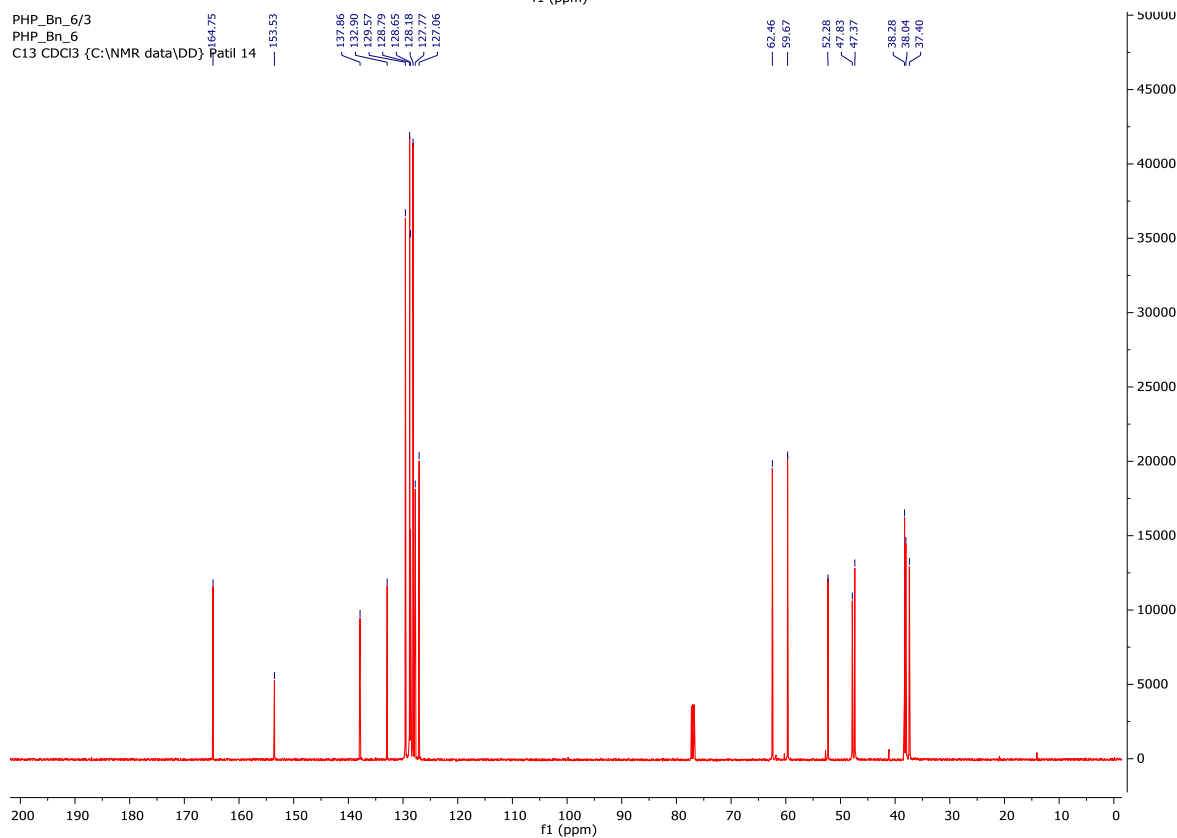



PHP\_Bn-6\_2\_Col3\_Sol1\_5-30%\_6min

PHP\_Bn-6\_2

3: Diode Array  
Range: 2.363

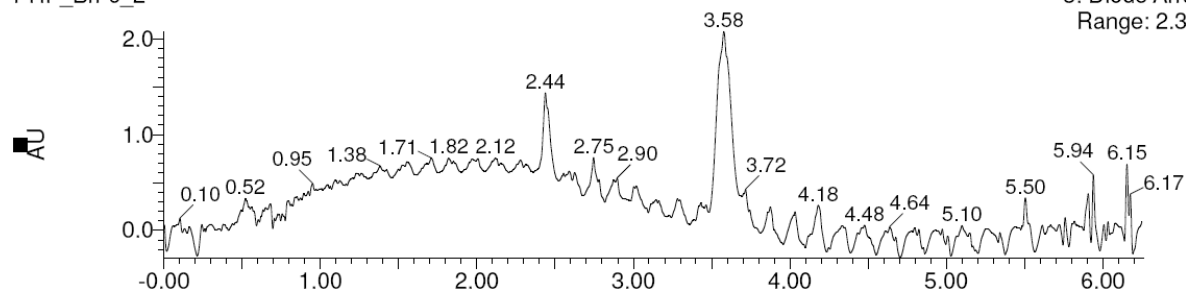

PHP\_Bn-6\_2

1: Scan ES+  
389  
9.84e8

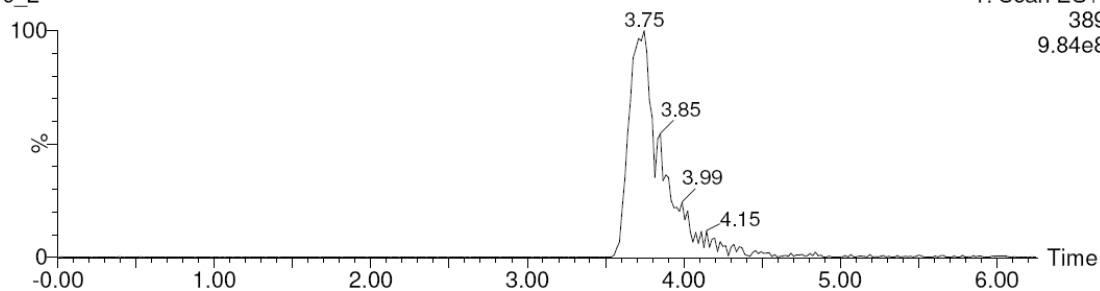

PHP\_Bn-6\_2\_Col3\_Sol1\_5-30%\_6min

PHP\_Bn-6\_2 214 (3.711) Cm (209:225)

1: Scan ES+  
8.53e7

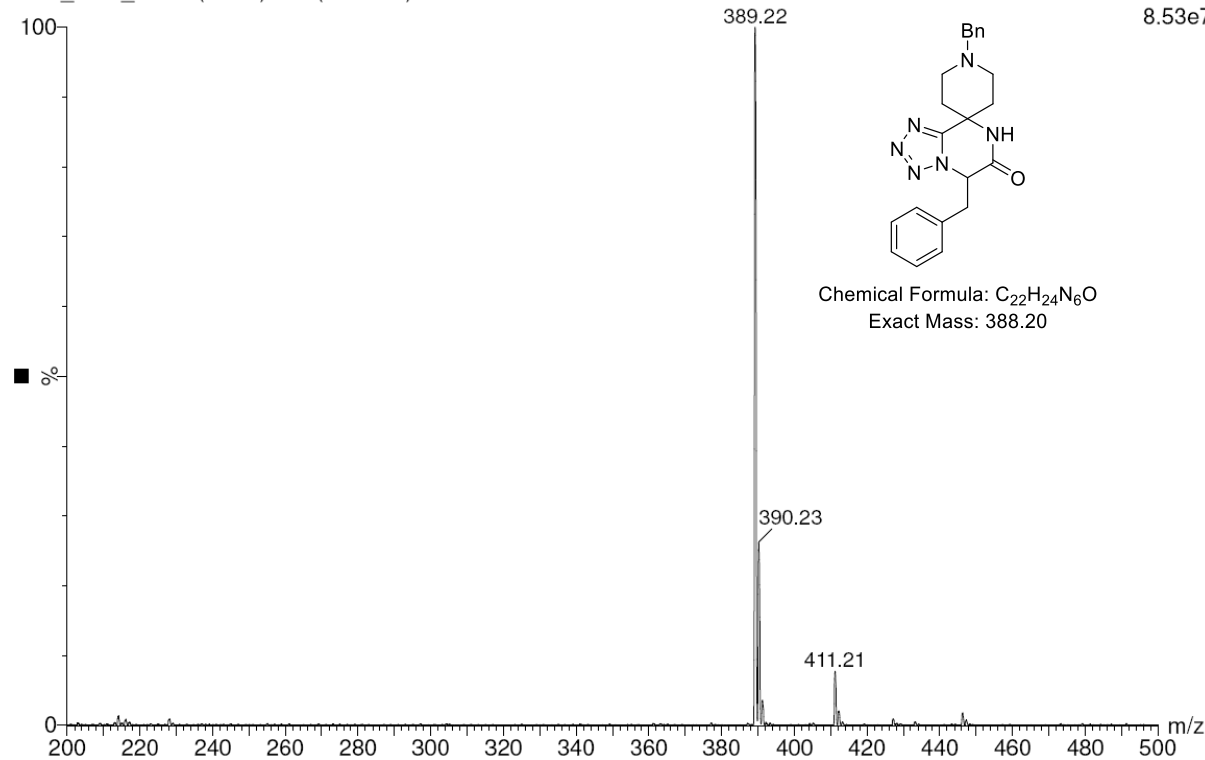

# 56c: ethyl 5'-benzyl-6'-oxo-6',7'-dihydro-5'H-spiro[piperidine-4,8'-tetrazolo[1,5-a]pyrazine]-1-carboxylate

PHP\_Bn\_9/1  
PHP\_Bn\_9  
PROTON CDCl3 {C:\NMR data\DD} Patil 5

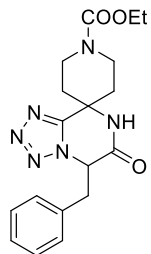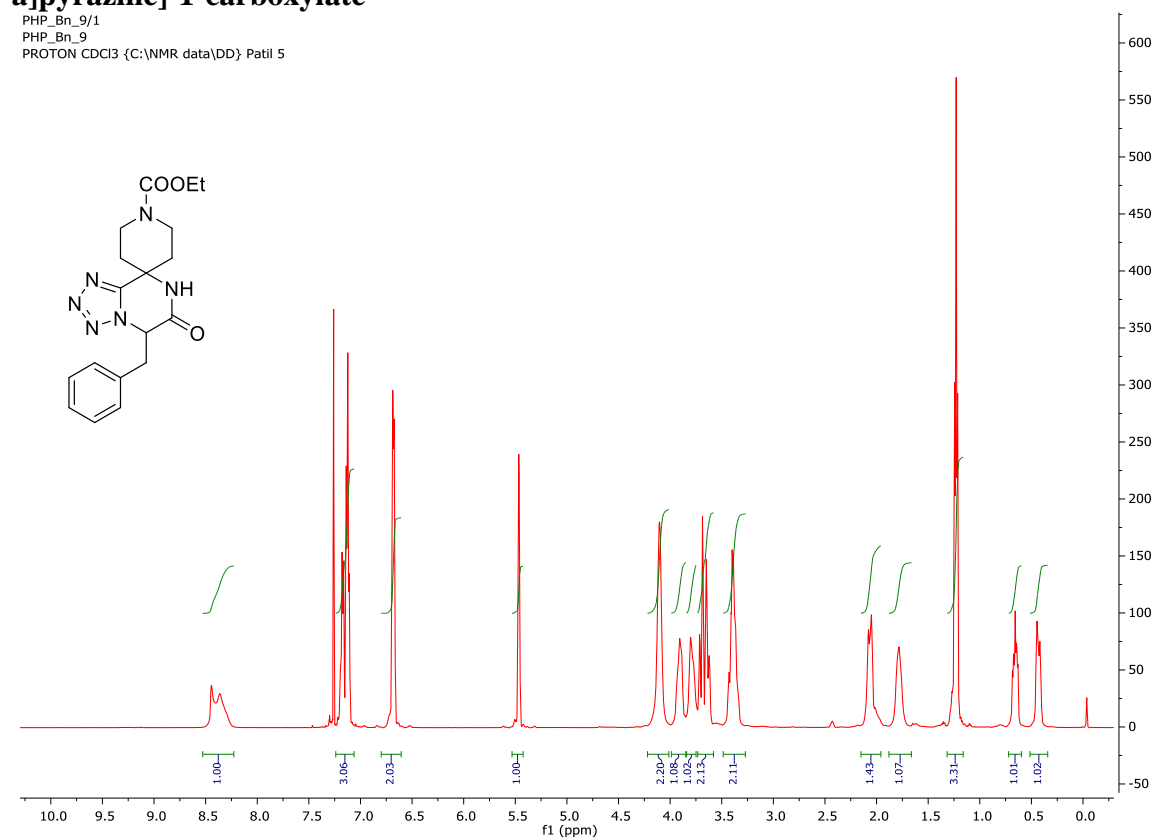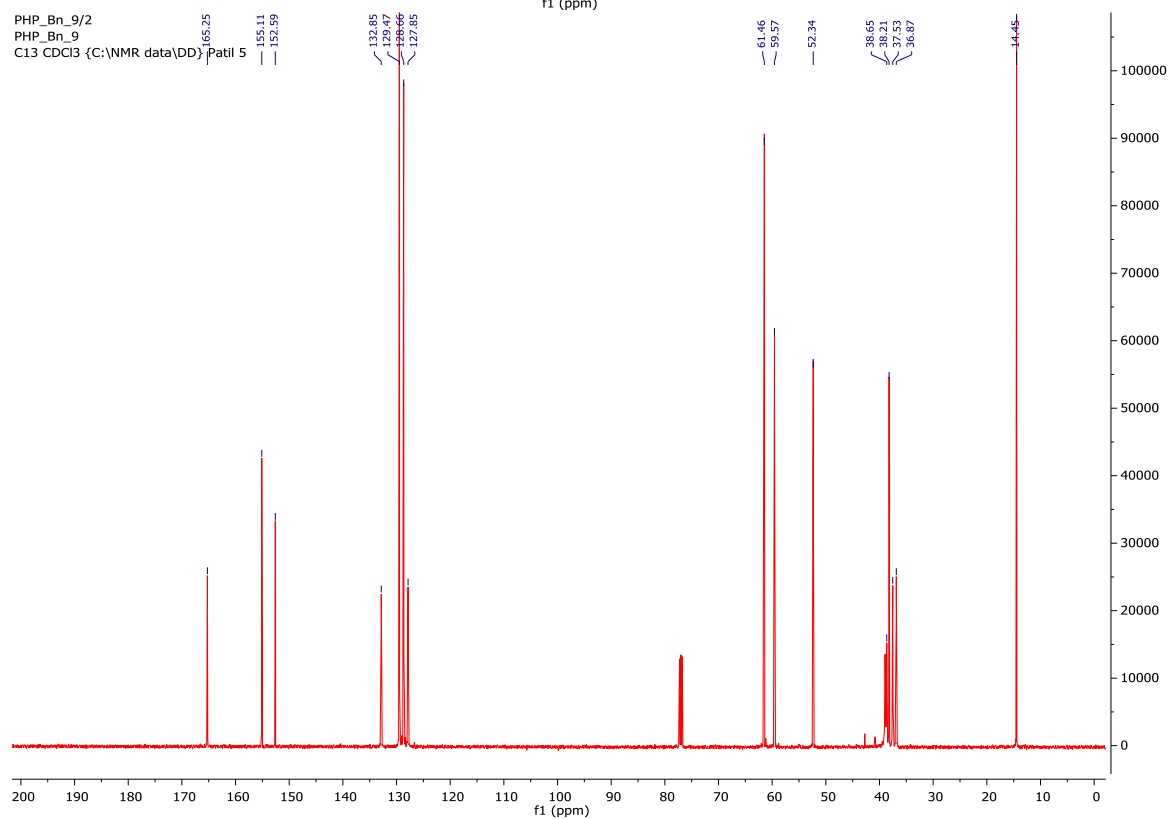

PHP\_Bn-9-3\_2\_Col3\_Sol1\_5-30%\_6min

PHP\_Bn-9-3\_2

3: Diode Array  
Range: 1.763

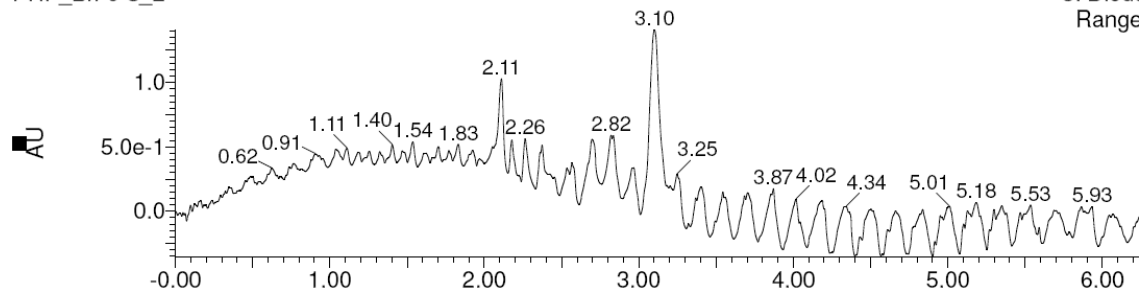

PHP\_Bn-9-3\_2

2: Scan ES-  
369  
1.26e8

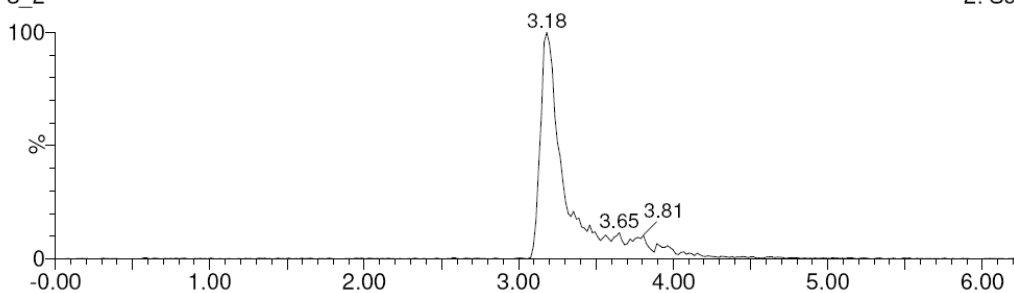

PHP\_Bn-9-3\_2\_Col3\_Sol1\_5-30%\_6min

PHP\_Bn-9-3\_2 183 (3.181) Cm (180:192)

2: Scan ES-  
8.15e6

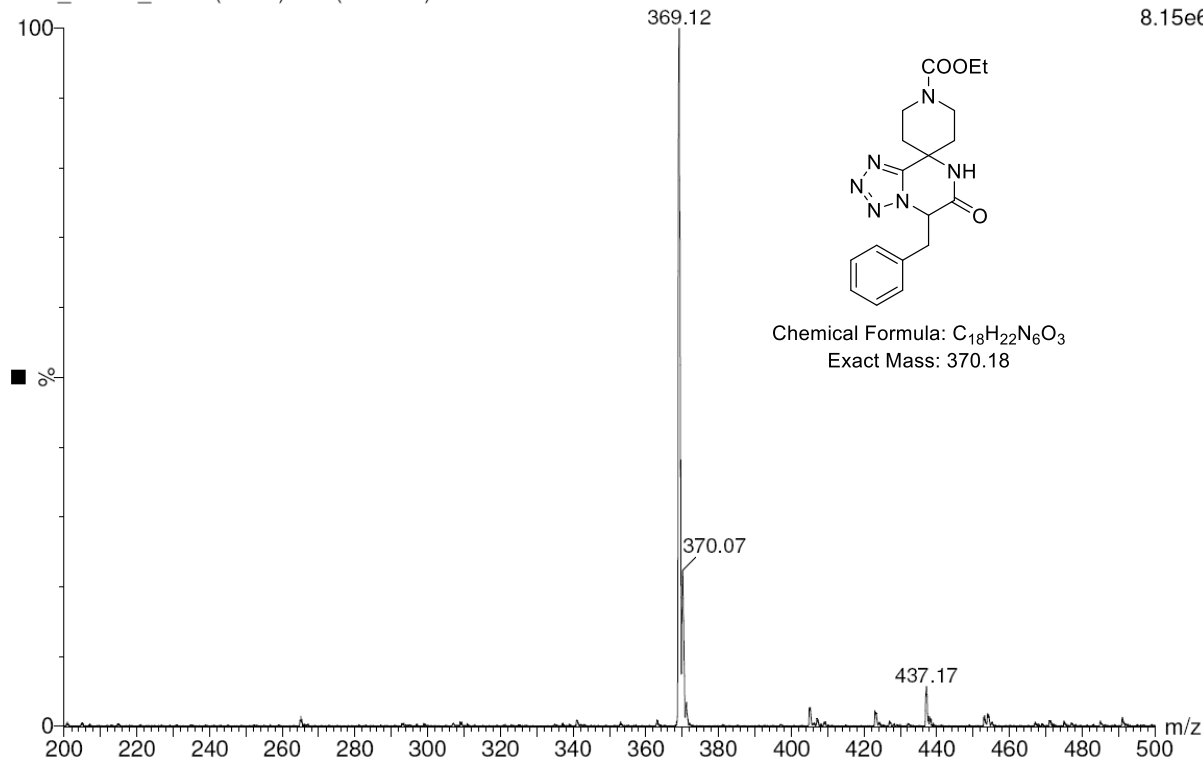

# 61c: 5-((1H-indol-3-yl)methyl)-8,8-dimethyl-7,8-dihydro-1,2,4-triazolo[1,5-a]pyrazin-6(5H)-one

PHP650.1.fid  
PHP650  
PROTON DMSO {C:\NMR data\DD} Patil 5

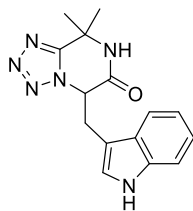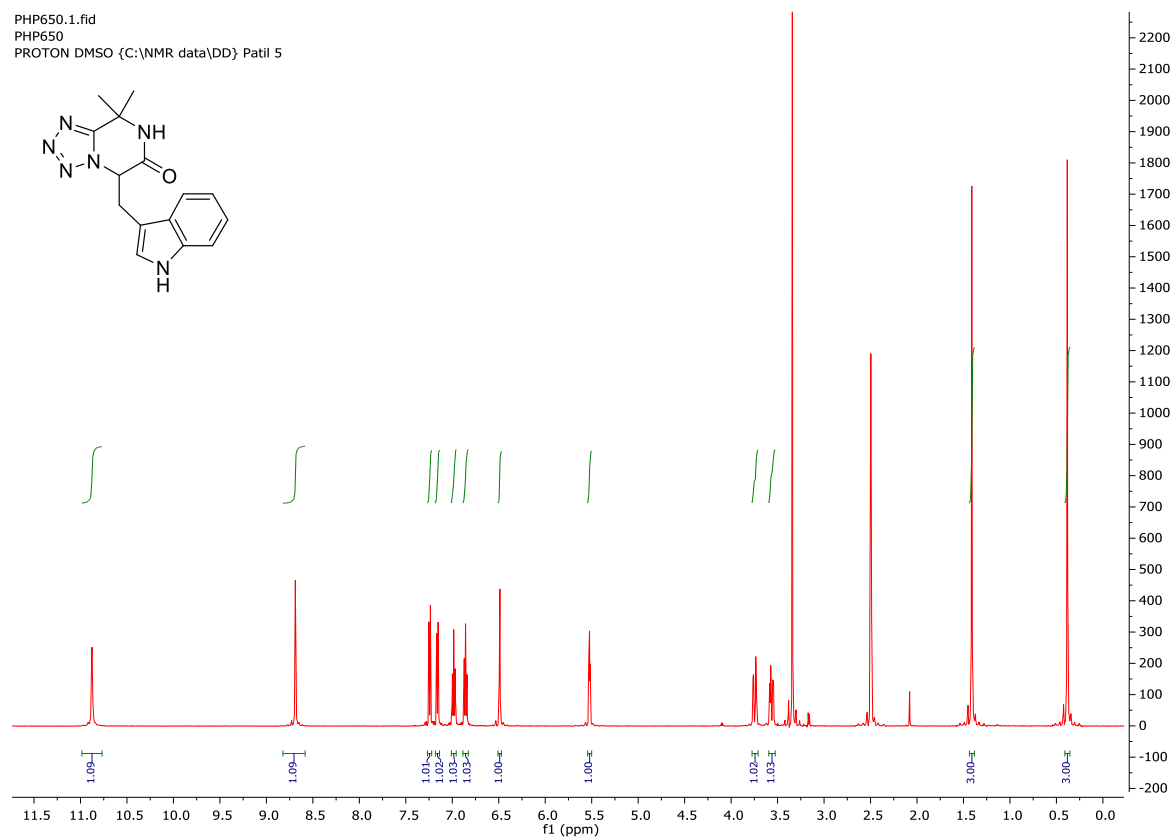

PHP650.2.fid  
PHP650  
C13 DMSO {C:\NMR data\DD} Patil 5

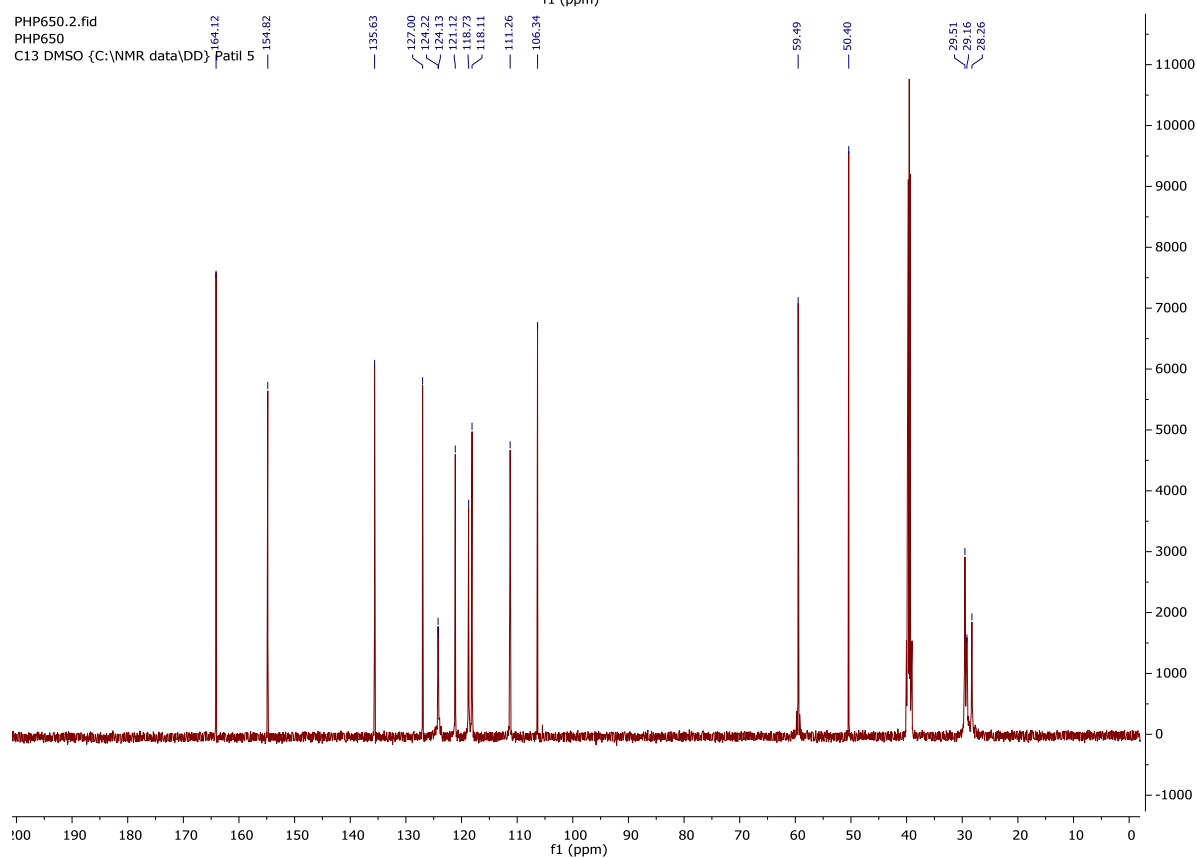

PHP650\_C1\_Col4\_Sol1\_5-30%\_6min  
PHP650\_c1

3: Diode Array  
Range: 8.236

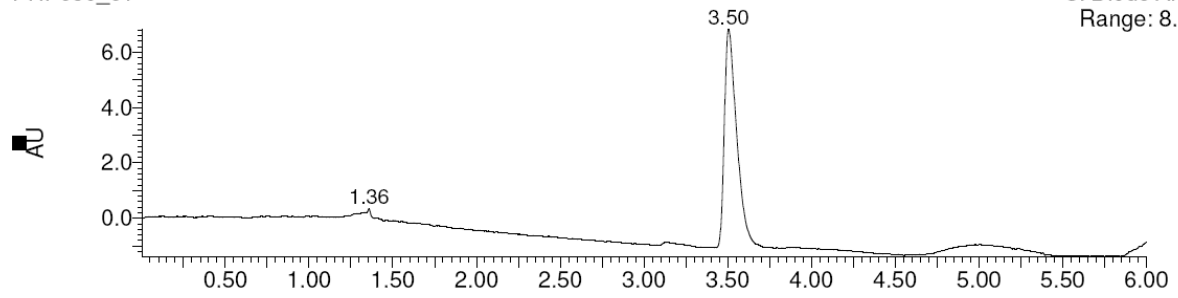

PHP650\_c1

1: Scan ES+  
297  
6.13e5

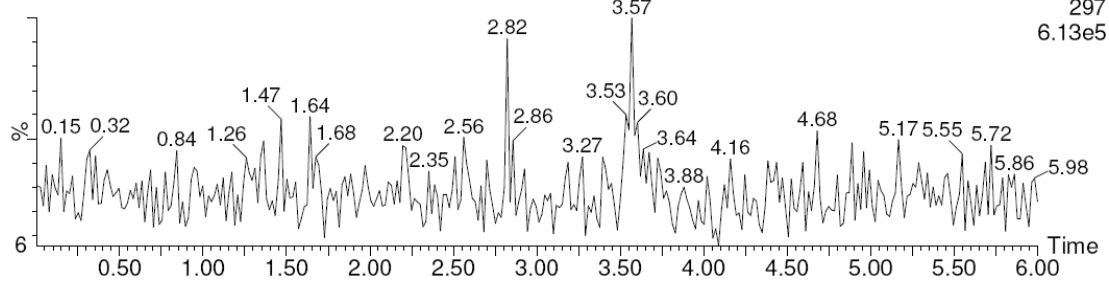

PHP650\_C1\_Col4\_Sol1\_5-30%\_6min  
PHP650\_c1 204 (3.534)

1: Scan ES+  
2.20e6

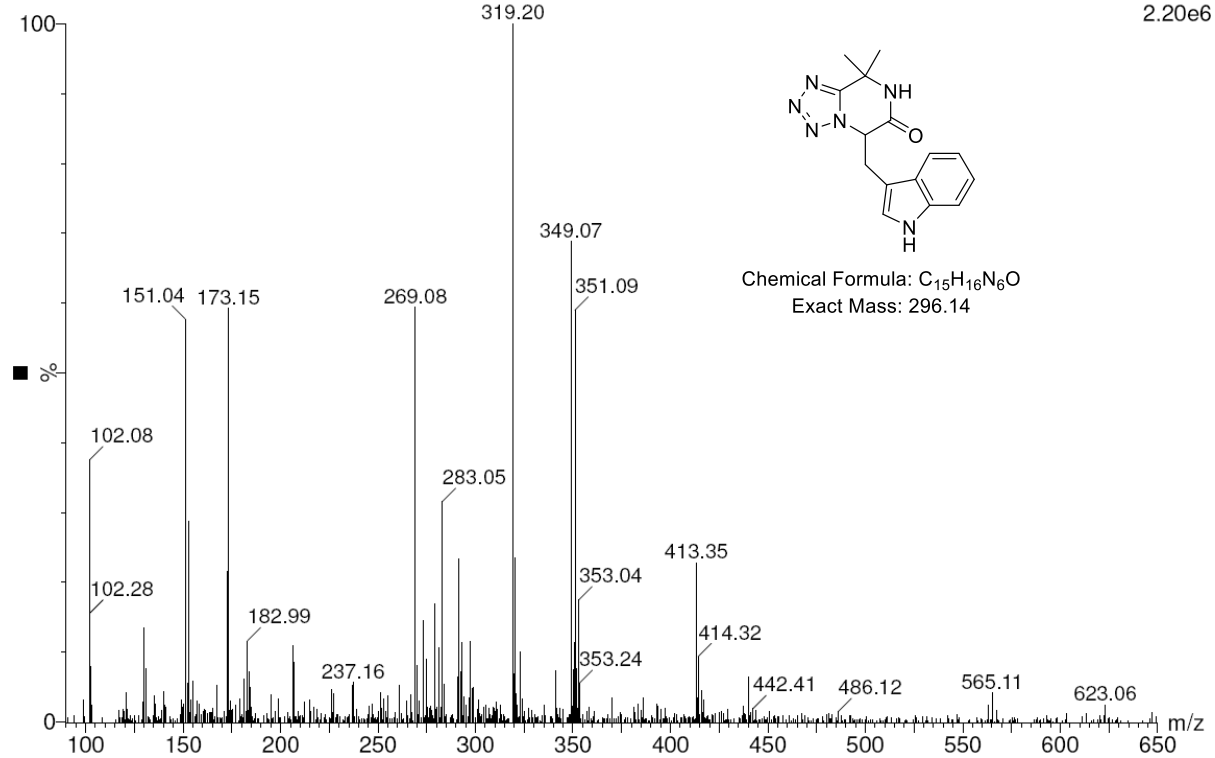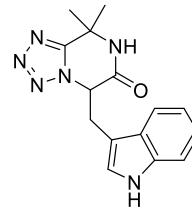

Chemical Formula: C<sub>15</sub>H<sub>16</sub>N<sub>6</sub>O  
Exact Mass: 296.14

# 62c: 5-((1H-indol-3-yl)methyl)-8,8-diethyl-7,8-dihydro-tetrazolo[1,5-a]pyrazin-6(5H)-one

PHP643.1.fid  
PHP643  
PROTON DMSO {C:\NMR data\DD} Patil 4

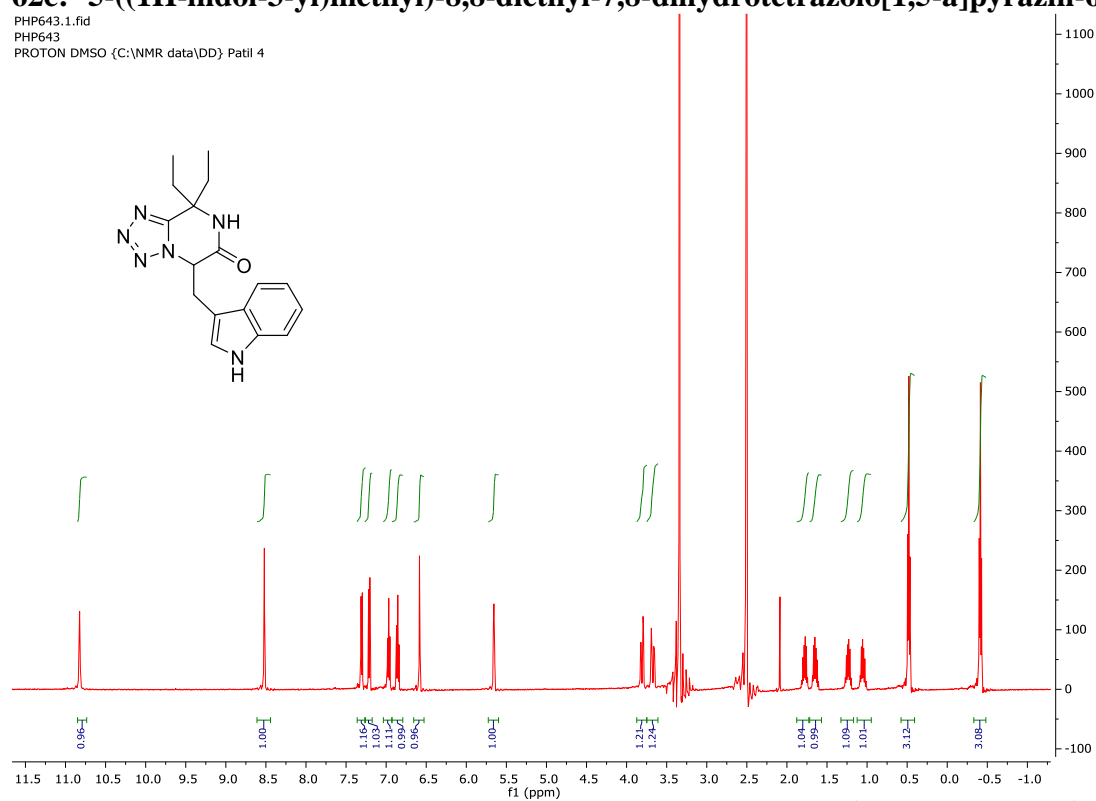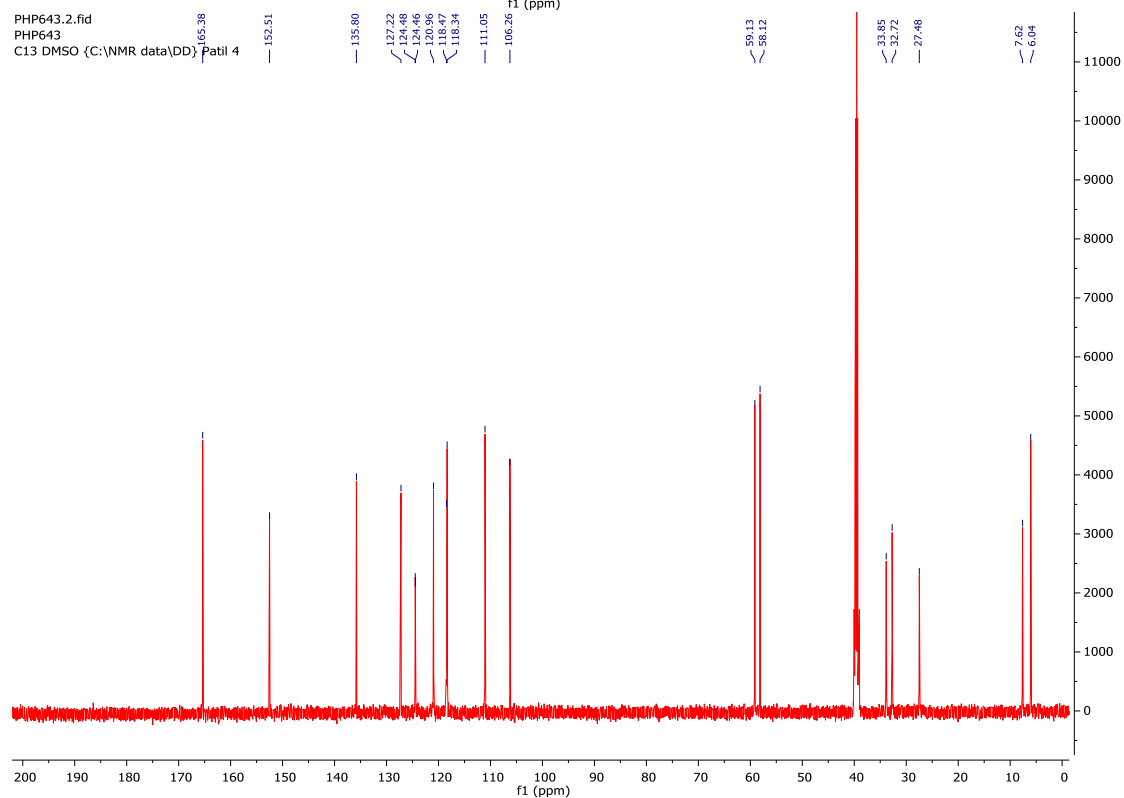

PHP643\_1\_Col3\_Sol1\_5-30%\_6min

PHP643\_1

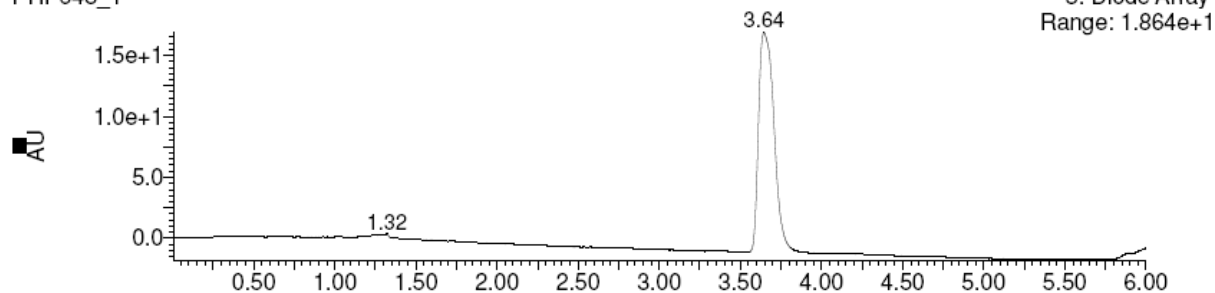

PHP643\_1

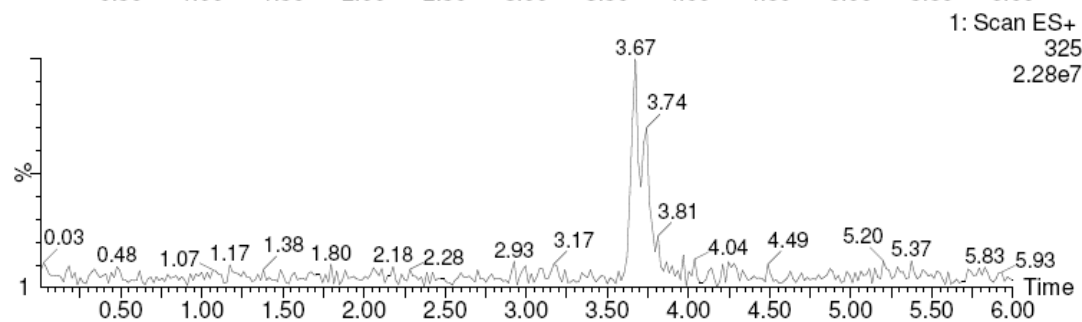

PHP643\_1\_Col3\_Sol1\_5-30%\_6min

PHP643\_1 213 (3.690)

1: Scan ES+ 2.25e7

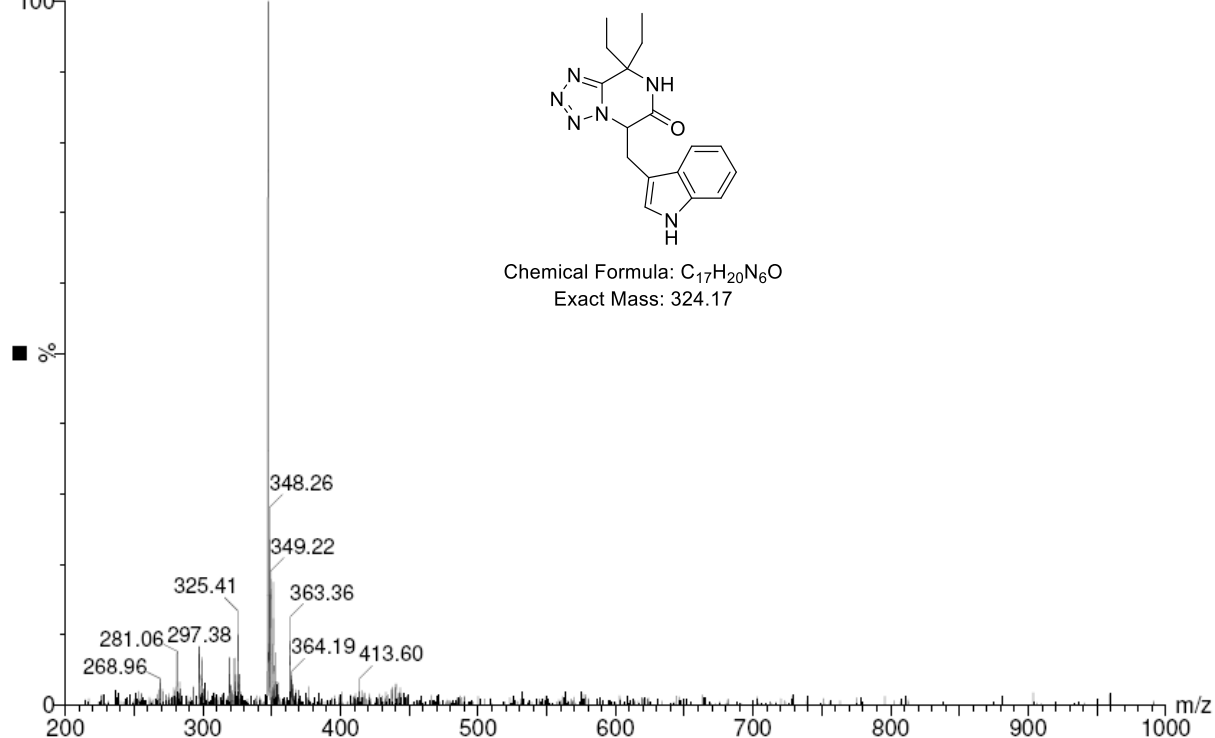

**66c: 5'-((1H-indol-3-yl)methyl)-5'H-spiro[cyclohexane-1,8'-tetrazolo[1,5-a]pyrazin]-6'(7'H)-one**

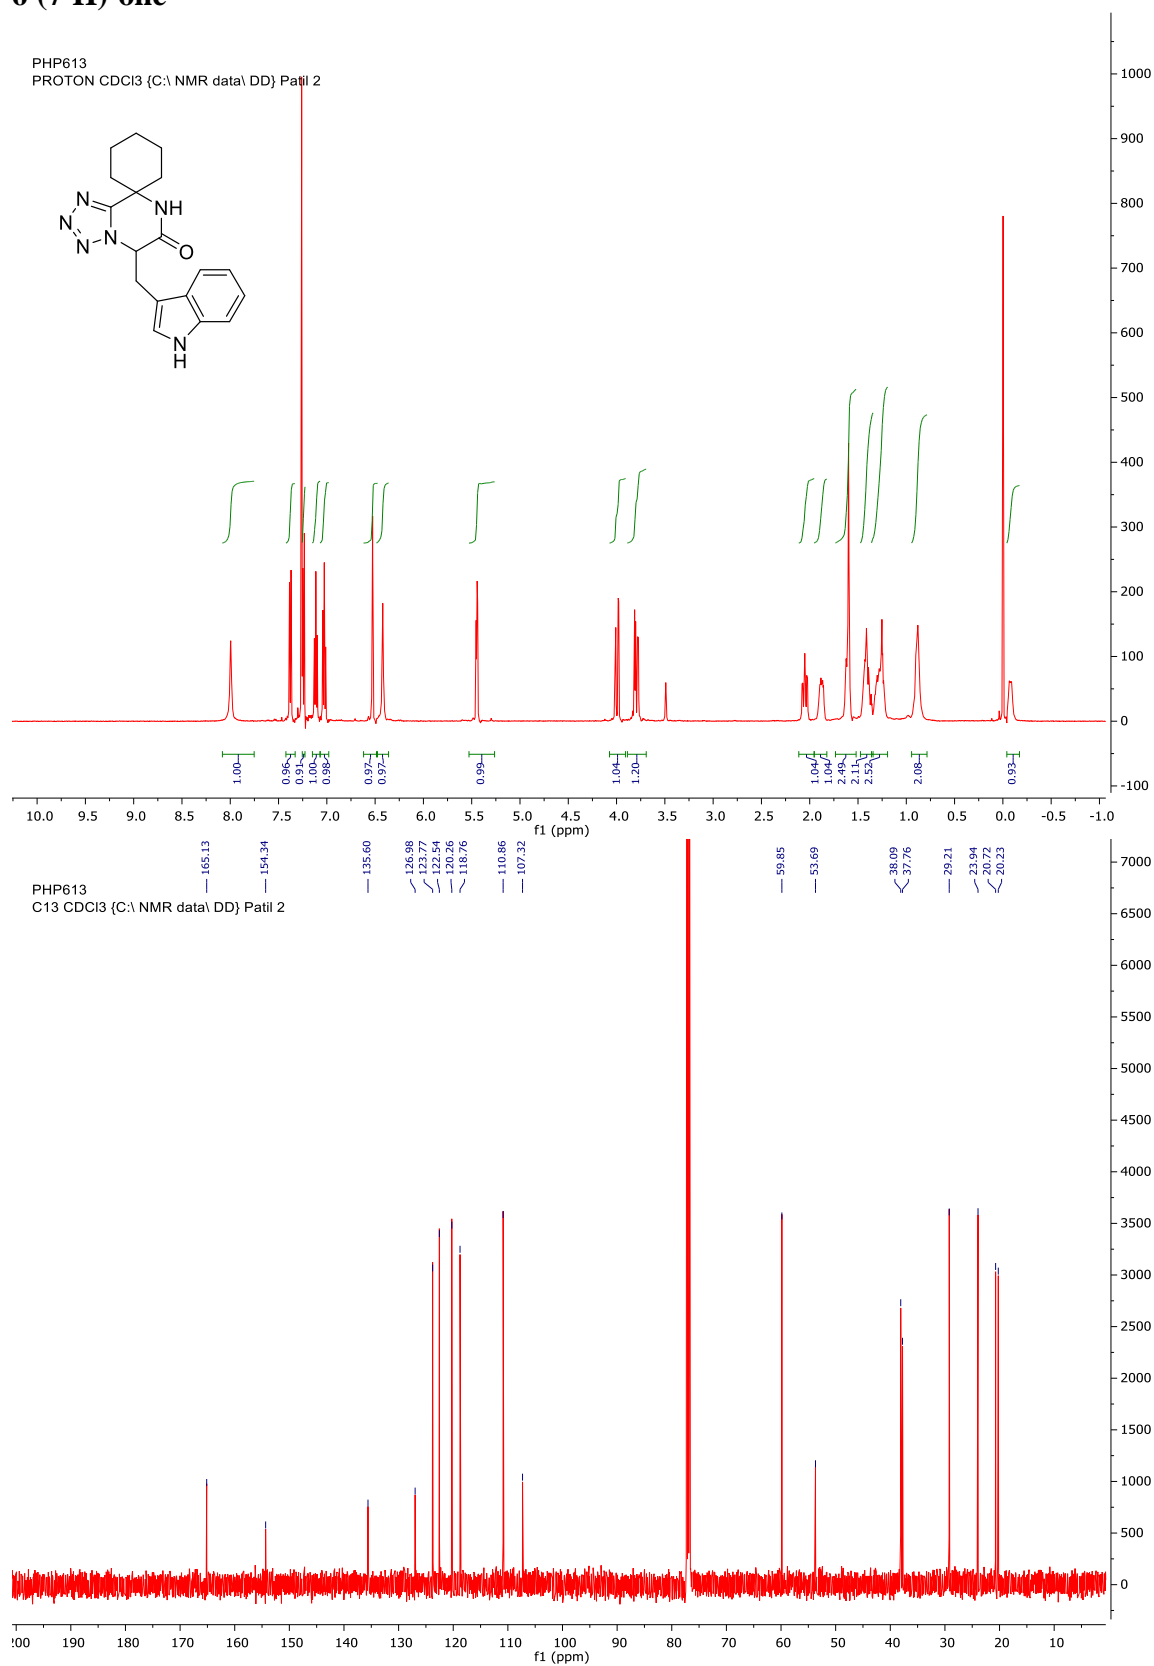



PHP613\_1\_Col4\_Sol1\_5-30%\_6min

PHP613\_1

3: Diode Array  
Range: 1.608e+1

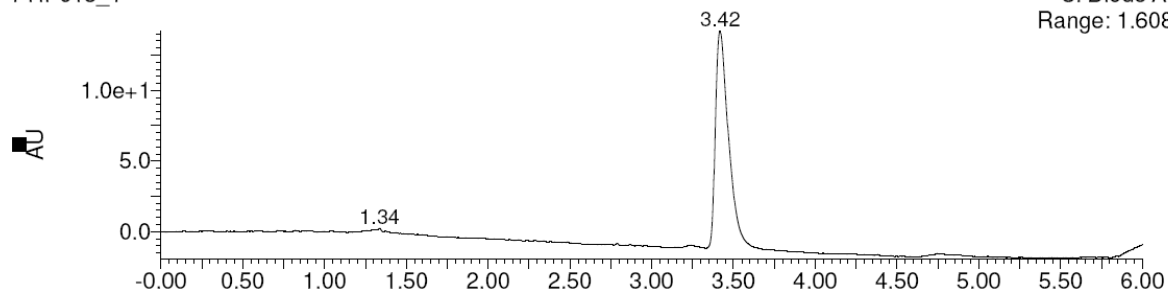

PHP613\_1

1: Scan ES+  
337  
1.72e6

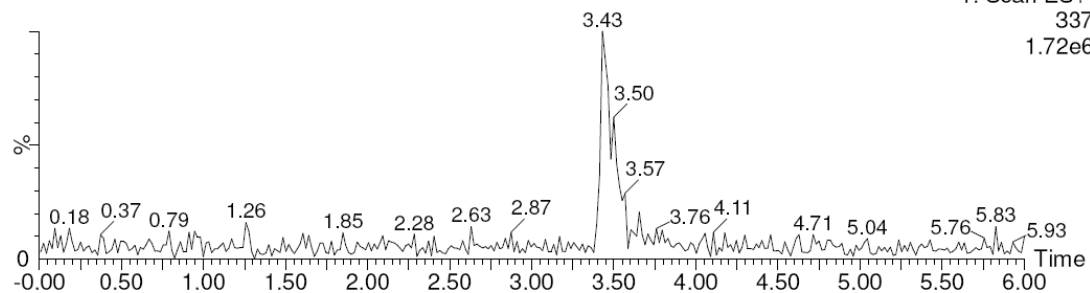

PHP613\_1\_Col4\_Sol1\_5-30%\_6min

PHP613\_1 198 (3.430)

1: Scan ES+  
8.77e6

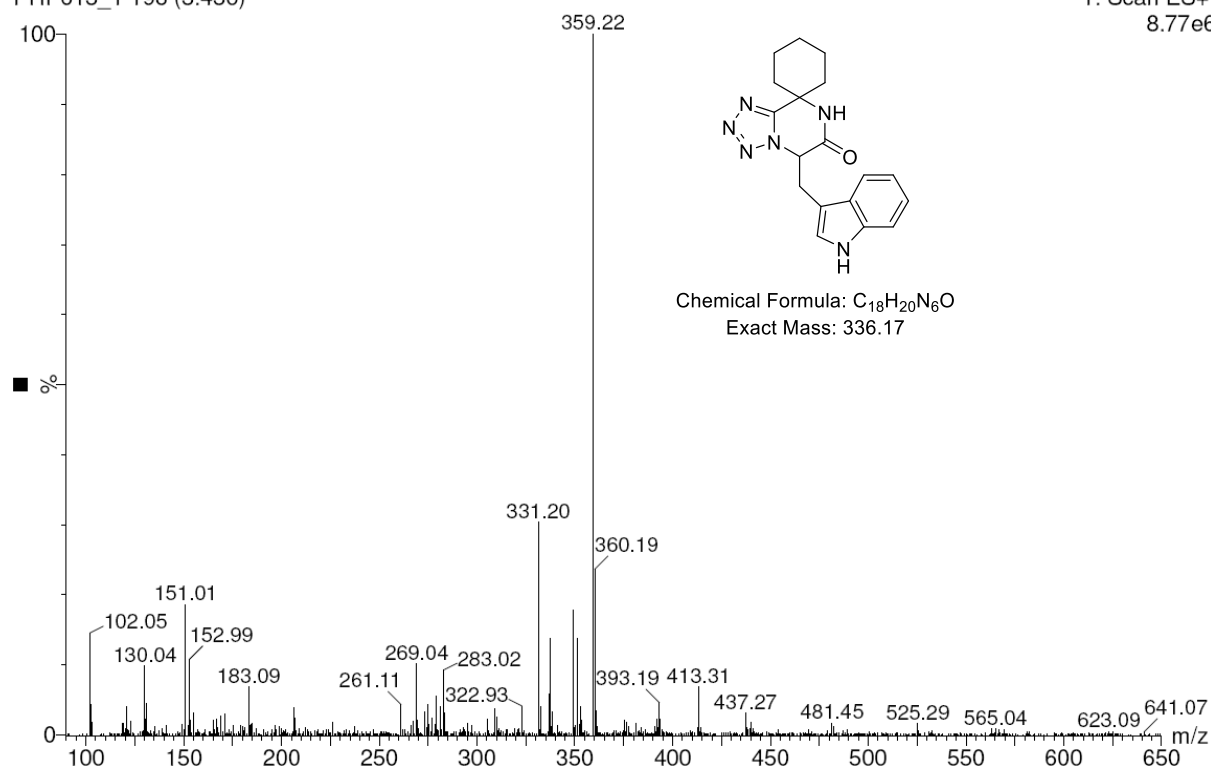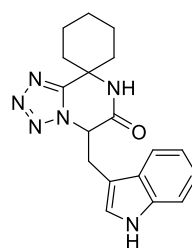

Chemical Formula: C<sub>18</sub>H<sub>20</sub>N<sub>6</sub>O  
Exact Mass: 336.17

**67c: 5'-((1H-indol-3-yl)methyl)-1-methyl-5'H-spiro[piperidine-4,8'-tetrazolo[1,5-a]pyrazin]-6'(7'H)-one**

PHP639.3.fid  
 PHP639  
 PROTON DMSO (C:\NMR data\DD) Patil 11

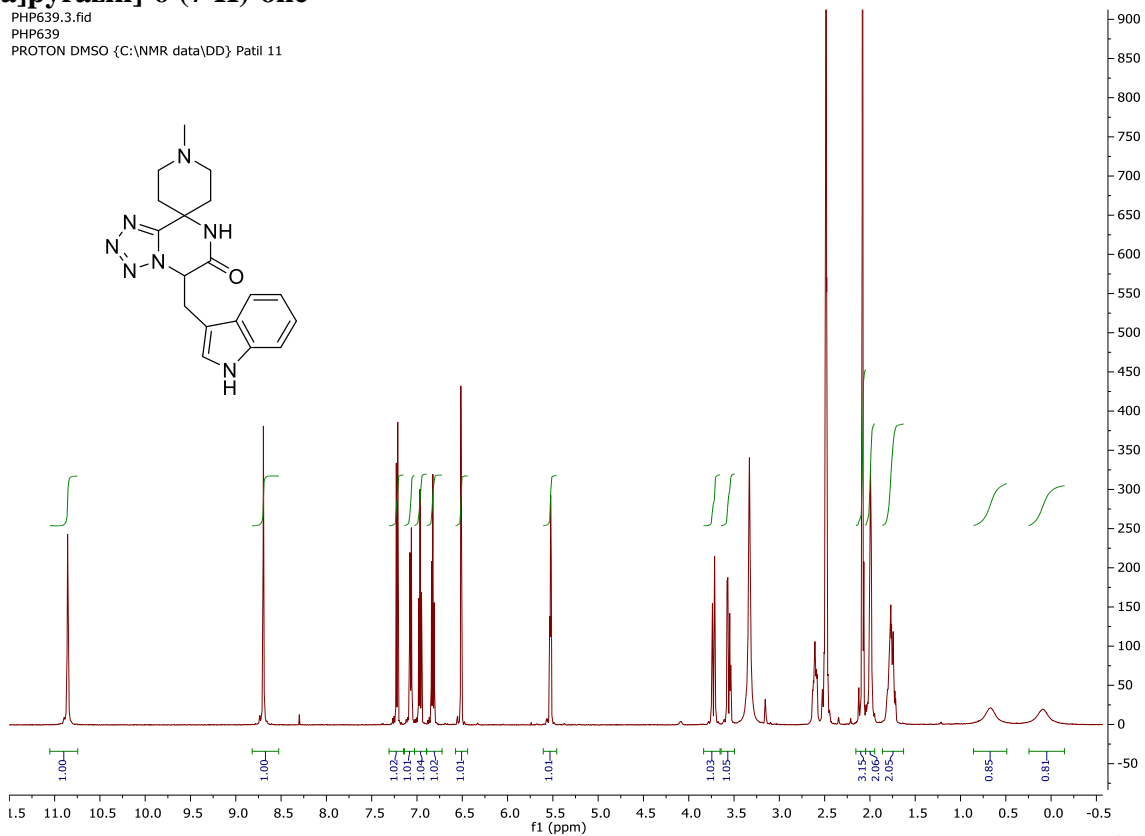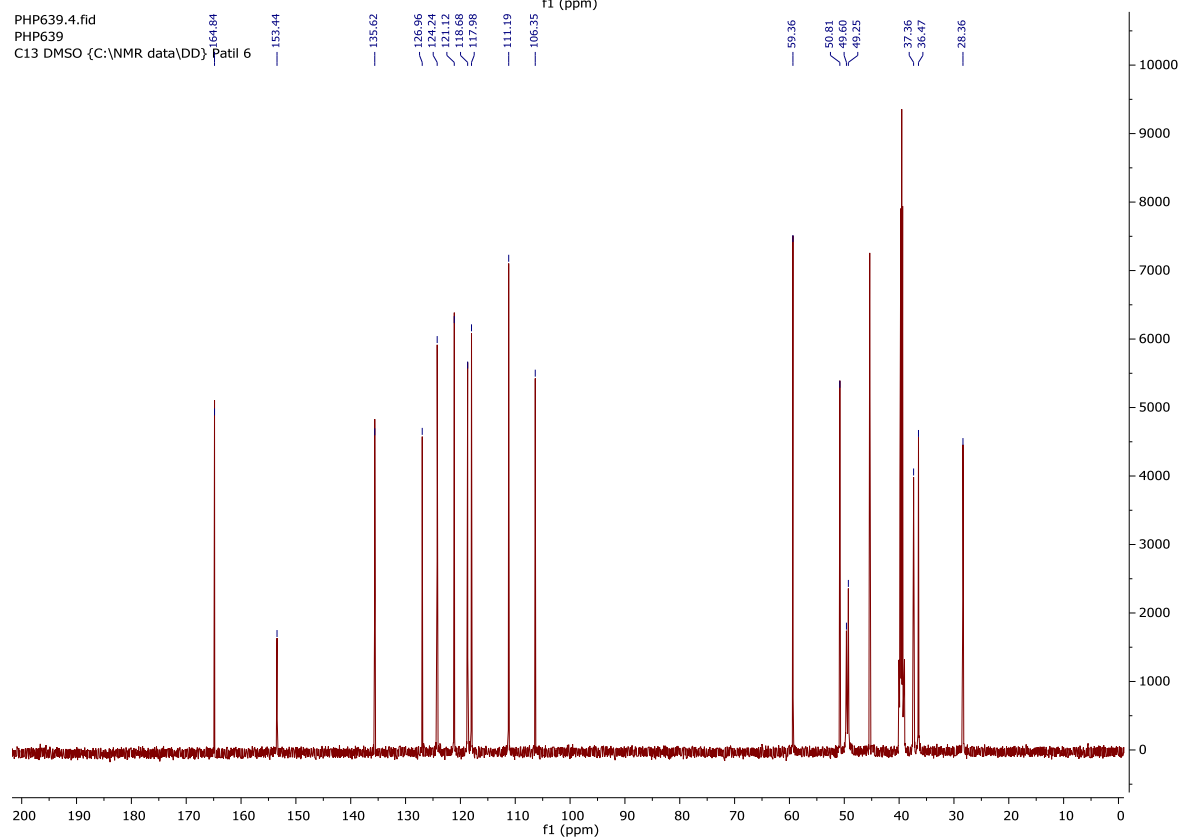

PHP\_639\_2\_Col3\_Sol1\_5-30%\_6min  
PHP\_639\_2

3: Diode Array  
Range: 1.451e+1

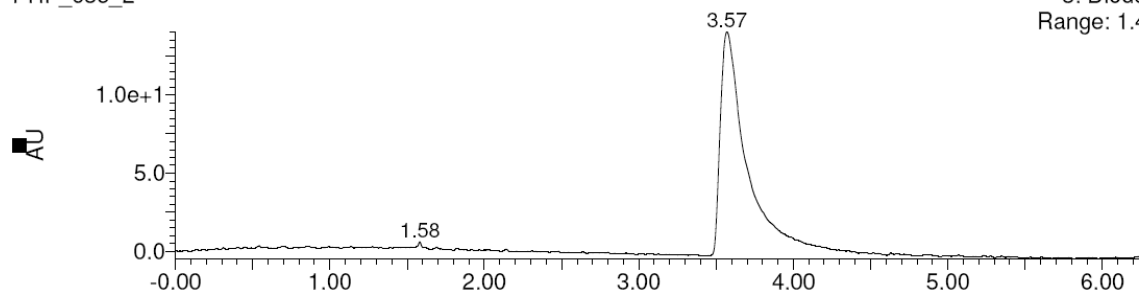

PHP\_639\_2

1: Scan ES+  
352  
5.61e8

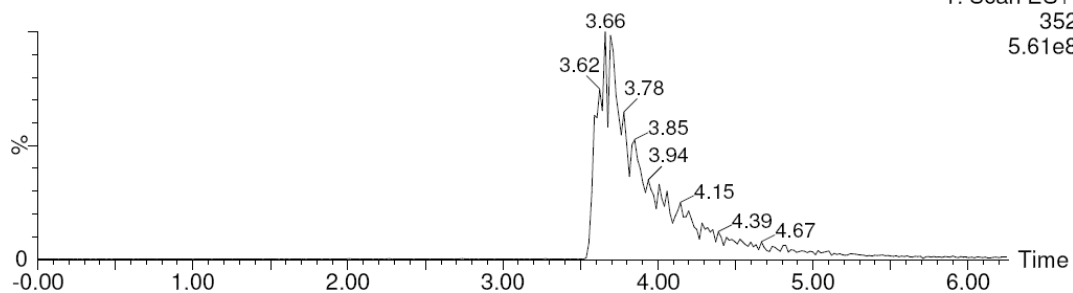

PHP\_639\_2\_Col3\_Sol1\_5-30%\_6min  
PHP\_639\_2 211 (3.659) Cm (206:243)

1: Scan ES+  
3.08e7

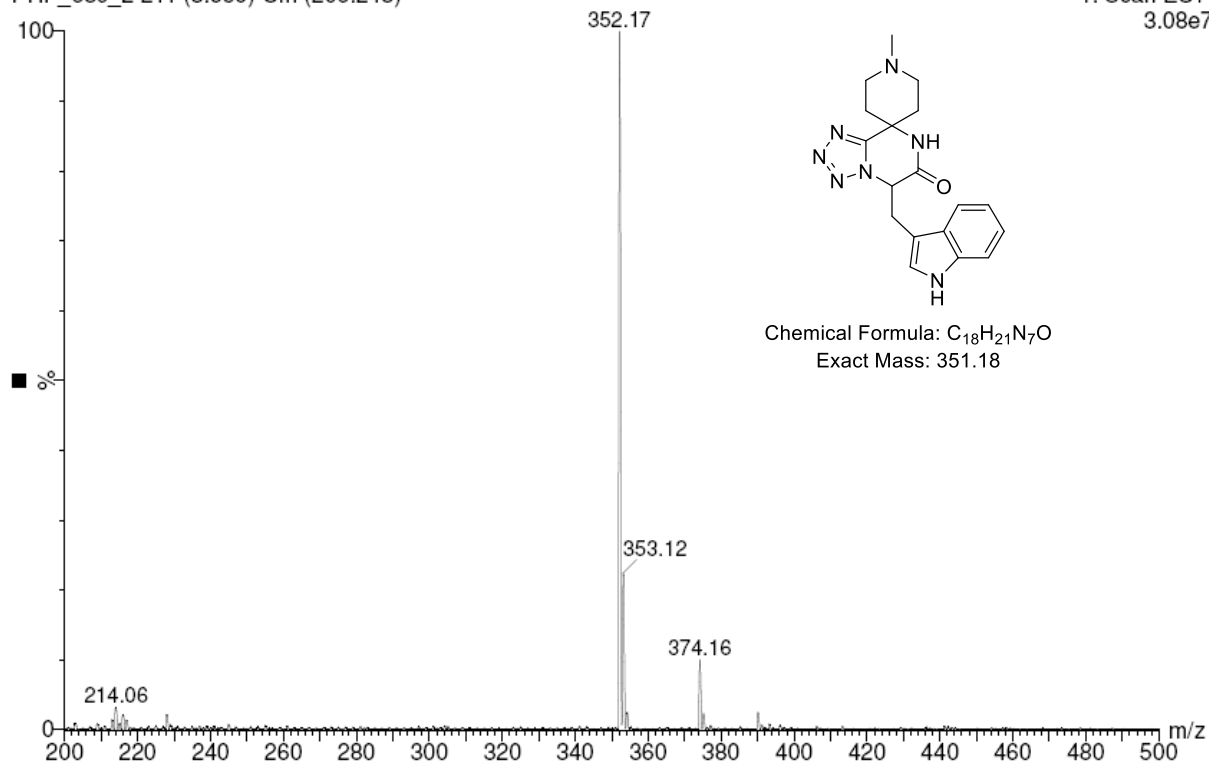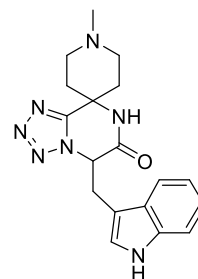

Chemical Formula: C<sub>18</sub>H<sub>21</sub>N<sub>7</sub>O  
Exact Mass: 351.18

**68c: 5'-((1H-indol-3-yl)methyl)-1-benzyl-5'H-spiro[piperidine-4,8'-tetrazolo[1,5-a]pyrazin]-6'(7'H)-one**

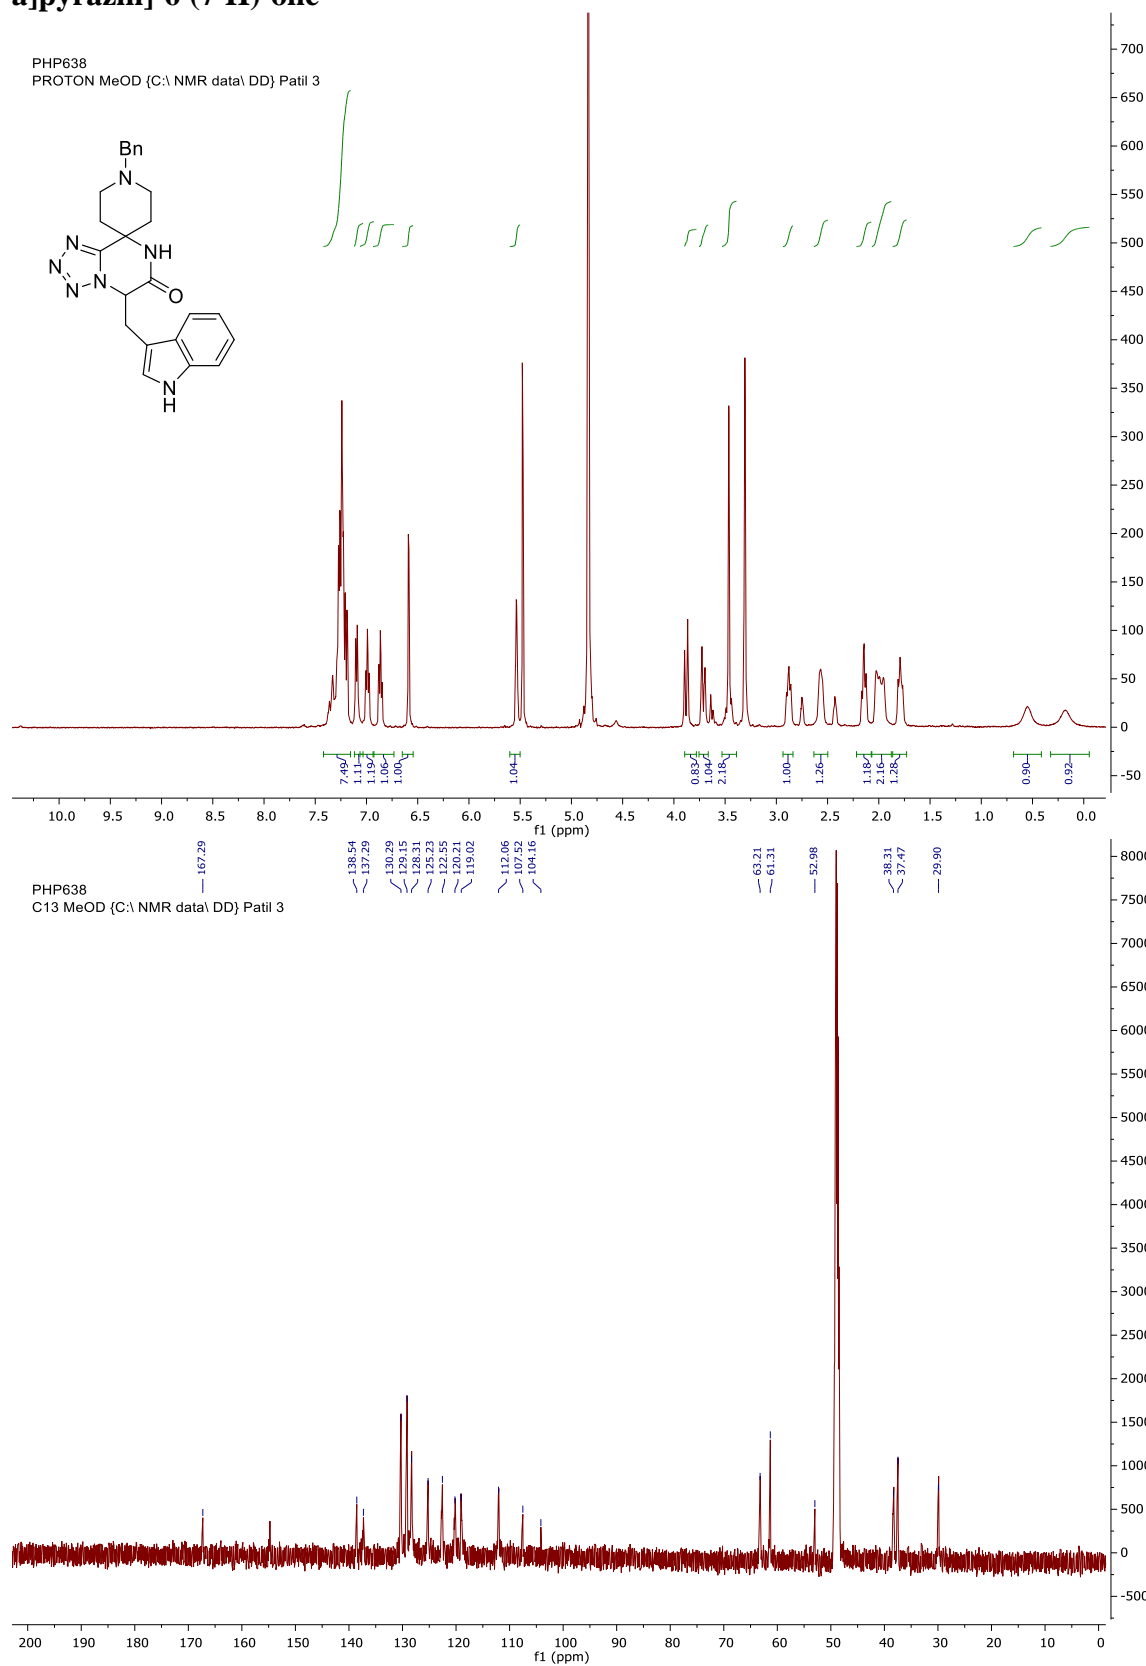

PHP638\_3\_Col3\_Sol1\_5-30%\_6min

PHP638\_3

3: Diode Array  
Range: 1.988e+1

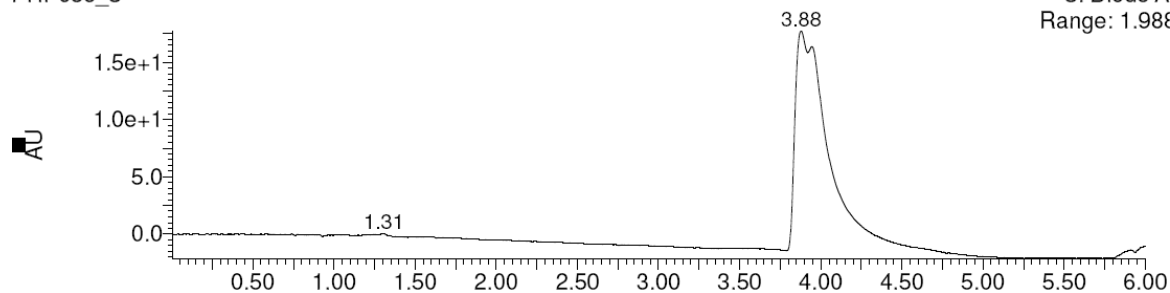

PHP638\_3

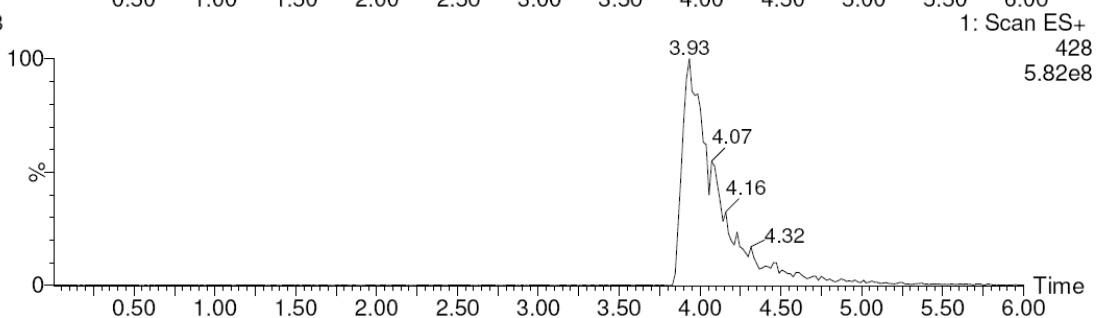

PHP638\_3\_Col3\_Sol1\_5-30%\_6min

PHP638\_3 225 (3.899)

1: Scan ES+  
7.56e7

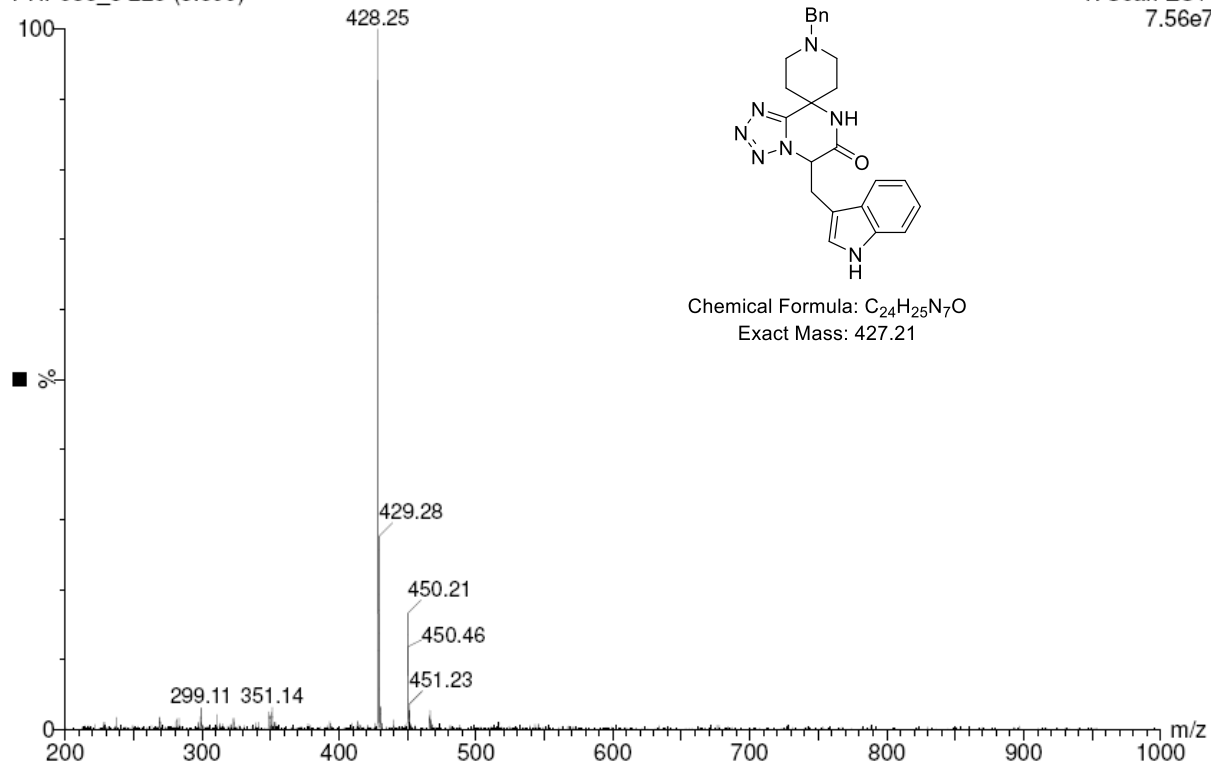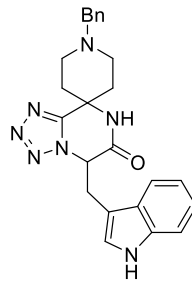

Chemical Formula: C<sub>24</sub>H<sub>25</sub>N<sub>7</sub>O  
Exact Mass: 427.21

## Crystal structure determination

X-ray diffraction data for single crystals of compounds **14c**, **16c**, **28c**, **29c**, **46c**, **61c** and **62c** were collected using SuperNova (Rigaku - Oxford Diffraction) four circle diffractometer with a mirror monochromator and a microfocus MoK $\alpha$  radiation source ( $\lambda = 0.7107 \text{ \AA}$ ) for **14c**, **29c**, **46c** and **62c** and CuK $\alpha$  radiation source ( $\lambda = 1.5418 \text{ \AA}$ ) for **16c**, **28c** and **61c**. Additionally, the diffractometer was equipped with a CryoJet HT cryostat system (Oxford Instruments) allowing low temperature experiments. Single crystals were mounted on MicroMounts<sup>TM</sup> and measured at temperature range 114-293 K. The obtained data sets were processed with CrysAlisPro software [S1]. The phase problem was solved by direct methods using SHELXS [S2], SIR2002 [S3] or SUPERFLIP [S4]. Parameters of obtained models were refined by full-matrix least-squares on  $F^2$  using SHELXL-2014/6 [S2]. Calculations were performed using WinGX integrated system (ver. 2013.2) [S5]. Figures were prepared with Mercury 3.5 software [S6].

All non-hydrogen atoms in the crystal structures of **14c**, **16c**, **28c**, **29c**, **46c**, **61c** and **62c** were refined anisotropically to ensure the convergence of the refinement process. All hydrogen atoms attached to carbon atoms were positioned with the idealised geometry and refined using the riding model with the isotropic displacement parameter  $U_{\text{iso}}[\text{H}] = 1.2$  (or 1.5)  $U_{\text{eq}}[\text{C}]$ . The position of hydrogen atoms linked to the N atoms were found on the difference Fourier map and refined with no restraints on the isotropic displacement parameter. Crystal data and structure refinement results for compounds **14c**, **16c**, **28c**, **29c**, **46c**, **61c** and **62c** are shown in Table S1.

In the crystal structure of compound **14c**, only one of the two molecules of the asymmetric unit is partially disordered, with site occupancy 62% and 38% (Figure S1). All tested crystals of compound **62c** gave datasets, suggesting racemic twinning of the structure. The twinned crystal consists of two components. For better handling of the twin data, the HKLF5 program was applied for data separation [S7]. From the total number of 11288 reflections, only 9734 were written to the final hkl file. Thus, separation of data for both components resulted in omission of 1554 reflections. This influenced final results and drastically decreased completeness of the data (86,8%).

Crystallographic data for structures presented in this paper have been deposited with the Cambridge Crystallographic Data Centre as supplementary publication nos. CCDC 1485229 (**14c**), CCDC 1485014 (**16c**), CCDC 1485015 (**28c**), CCDC 1485018 (**29c**), CCDC 1485230 (**46c**), CCDC 1484776 (**61c**), CCDC1485230 (**62c**). Copies of the data can be obtained, free of charge, on application to CCDC, 12 Union Road, Cambridge CB2 1EZ, UK, (fax: +44-(0)1223-336033 or e-mail: deposit@ccdc.cam.ac.uk).

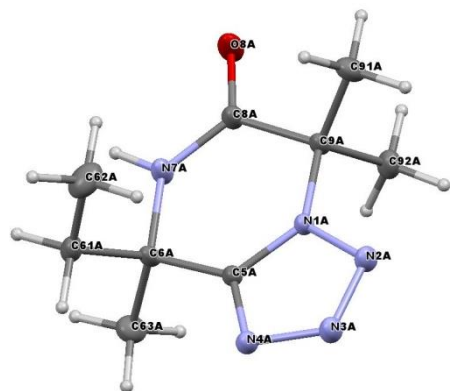

**14c**

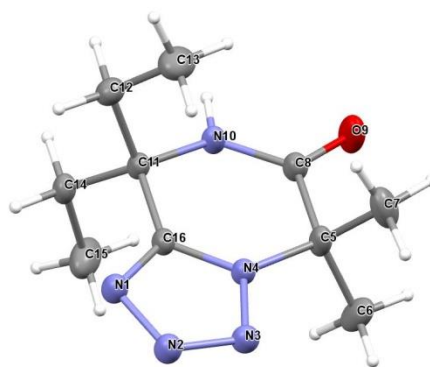

**16c**

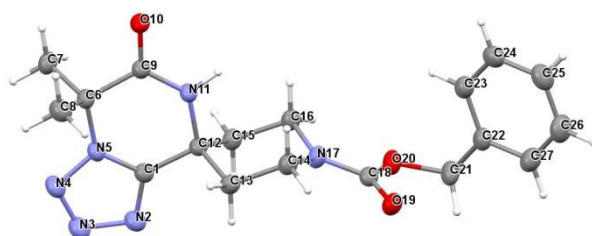

**28c**

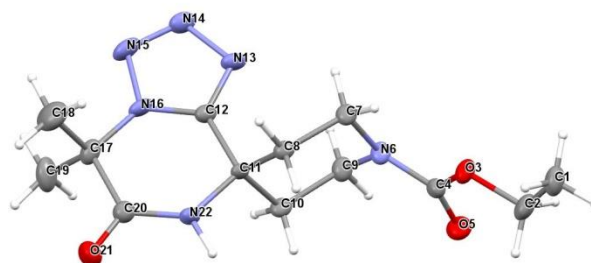

**29c**

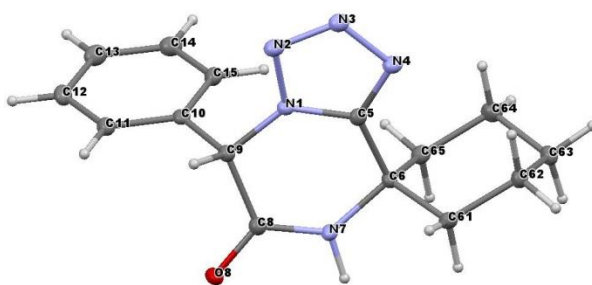

**46c**

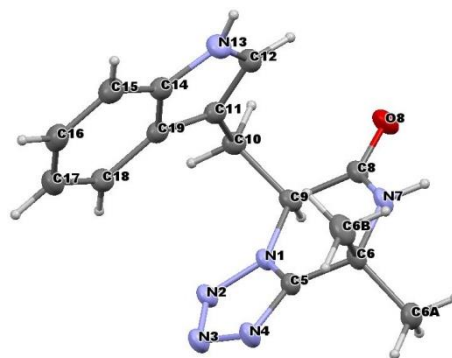

**61c**

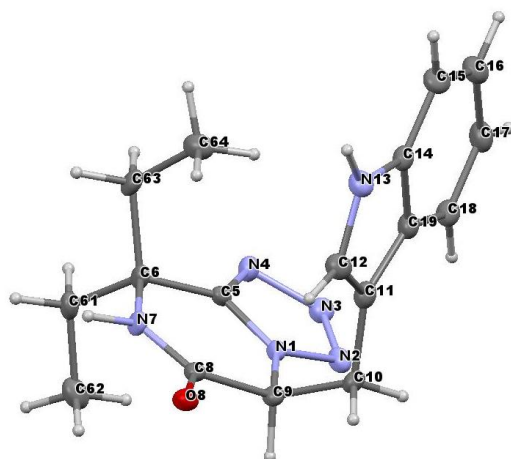

**62c**

**Figure S1.** Molecular geometry observed in the crystal structures of compounds **14c**, **16c**, **28c**, **29c**, **46c**, **61c** and **62c**, showing the atom labelling scheme. For structures **14c**, **16c** and **29c** only one of the four (**16c,29c**) or two (**14c**) molecules of the asymmetric unit is presented for clarity of the figure. For structure of **14c** only the non-disordered molecule is presented in the figure. Displacement ellipsoids of non-hydrogen atoms are drawn at the 30% probability level. H atoms are presented as small spheres with an arbitrary radius.



Table S1. Crystal data and structure refinement results for compounds.

| compounds                              | 14c                                                                                         | 16c                                                                                                       | 28c                                                                                        | 29c                                                                                                 | 46c                                                                                        | 61c                                                                           | 62c (TWIN)                                                                                     |
|----------------------------------------|---------------------------------------------------------------------------------------------|-----------------------------------------------------------------------------------------------------------|--------------------------------------------------------------------------------------------|-----------------------------------------------------------------------------------------------------|--------------------------------------------------------------------------------------------|-------------------------------------------------------------------------------|------------------------------------------------------------------------------------------------|
| Empirical moiety formula               | C <sub>9</sub> H <sub>15</sub> N <sub>5</sub> O                                             | C <sub>10</sub> H <sub>17</sub> N <sub>5</sub> O                                                          | C <sub>18</sub> H <sub>22</sub> N <sub>6</sub> O <sub>3</sub>                              | C <sub>13</sub> H <sub>20</sub> N <sub>6</sub> O <sub>3</sub>                                       | C <sub>15</sub> H <sub>17</sub> N <sub>5</sub> O                                           | C <sub>15</sub> H <sub>16</sub> N <sub>6</sub> O                              | C <sub>17</sub> H <sub>20</sub> N <sub>6</sub> O                                               |
| Formula weight [g/mol]                 | 209.26                                                                                      | 223.29                                                                                                    | 370.42                                                                                     | 308.35                                                                                              | 283.33                                                                                     | 296.34                                                                        | 324.39                                                                                         |
| Temperature [K]                        | 130(2)                                                                                      | 130.0 (10)                                                                                                | 122.1 (3)                                                                                  | 114.0 (2)                                                                                           | 298(2)                                                                                     | 130(2)                                                                        | 130(2)                                                                                         |
| Wavelength [Å]                         | 0.7107                                                                                      | 1.5418                                                                                                    | 1.5418                                                                                     | 0.7107                                                                                              | 0.7107                                                                                     | 1.5418                                                                        | 0.7107                                                                                         |
| Crystal system                         | Monoclinic                                                                                  | Triclinic                                                                                                 | Monoclinic                                                                                 | Triclinic                                                                                           | Monoclinic                                                                                 | Orthorhombic                                                                  | Monoclinic                                                                                     |
| Space group                            | P2 <sub>1</sub> /a                                                                          | P-1                                                                                                       | P2 <sub>1</sub> /c                                                                         | P-1                                                                                                 | P2 <sub>1</sub> /a                                                                         | P b c a                                                                       | P2 <sub>1</sub> /c                                                                             |
| Unit cell dimensions                   | a = 12.0138(3) Å<br>b = 11.5538(2) Å<br>c = 16.1111(4) Å<br>α=90°<br>β=103.490(3)°<br>γ=90° | a = 11.5385(4) Å<br>b = 13.1560(4) Å<br>c = 17.7901(4) Å<br>α= 77.400(2)°<br>β=89.452(2)°<br>γ=64.277(3)° | a = 9.5857(2) Å<br>b = 14.8105(2) Å<br>c = 13.4801(2) Å<br>α=90°<br>β=110.159(2)°<br>γ=90° | a=14.5469(5) Å<br>b=15.1175(4) Å<br>c=15.4719(4) Å<br>α=85.090 (2)°<br>β=61.986(3)°<br>γ=89.869(2)° | a = 6.9311(4) Å<br>b = 19.6495(9) Å<br>c = 10.2901(5) Å<br>α=90°<br>β=104.068(5)°<br>γ=90° | a=14.6004(4) Å<br>b=12.6936(3) Å<br>c=15.8003(5) Å<br>α=90°<br>β=90°<br>γ=90° | a = 9.3572(14) Å<br>b = 14.6849(12) Å<br>c = 12.2349(17) Å<br>α=90°<br>β=110.771(17)°<br>γ=90° |
| Volume [Å <sup>3</sup> ]               | 2174.60(9)                                                                                  | 2363.19(12)                                                                                               | 1796.52(5)                                                                                 | 2990.01(15)                                                                                         | 1359.40(12)                                                                                | 2928.30(14)                                                                   | 1571.9(4)                                                                                      |
| Z                                      | 8                                                                                           | 8                                                                                                         | 4                                                                                          | 8                                                                                                   | 4                                                                                          | 8                                                                             | 4                                                                                              |
| D <sub>calc</sub> [Mg/m <sup>3</sup> ] | 1.278                                                                                       | 1.255                                                                                                     | 1.370                                                                                      | 1.294                                                                                               | 1.384                                                                                      | 1.344                                                                         | 1.371                                                                                          |
| μ [mm <sup>-1</sup> ]                  | 0.090                                                                                       | 0.704                                                                                                     | 0.798                                                                                      | 0.101                                                                                               | 0.092                                                                                      | 0.738                                                                         | 0.091                                                                                          |
| F(000)                                 | 896                                                                                         | 960                                                                                                       | 784                                                                                        | 1312                                                                                                | 600                                                                                        | 1248                                                                          | 688                                                                                            |
| Crystal size [mm <sup>3</sup> ]        | 0.5 x 0.4 x 0.2                                                                             | 0.4 x 0.2 x 0.2                                                                                           | 0.2 x 0.2 x 0.15                                                                           | 0.4 x 0.4 x 0.2                                                                                     | 0.3 x 0.3 x 0.07                                                                           | 0.2 x 0.2 x 0.2                                                               | 0.3 x 0.15 x 0.05                                                                              |
| Θ range                                | 2.98° to 28.61°                                                                             | 3.84° to 77.15°                                                                                           | 2.98° to 76.33°                                                                            | 2.96° to 28.59°                                                                                     | 2.91° to 28.56°                                                                            | 5.40° to 71.10°                                                               | 3.54° to 27.63°                                                                                |
| Index ranges                           | -15 ≤ h ≤ 13,<br>-15 ≤ k ≤ 14,<br>-17 ≤ l ≤ 21                                              | -14 ≤ h ≤ 14,<br>-16 ≤ k ≤ 16,<br>-22 ≤ l ≤ 22                                                            | -12 ≤ h ≤ 12,<br>-18 ≤ k ≤ 18,<br>-17 ≤ l ≤ 17                                             | -19 ≤ h ≤ 19,<br>-20 ≤ k ≤ 20,<br>-20 ≤ l ≤ 19                                                      | -9 ≤ h ≤ 5,<br>-26 ≤ k ≤ 24,<br>-13 ≤ l ≤ 13                                               | -13 ≤ h ≤ 17,<br>-12 ≤ k ≤ 15,<br>-19 ≤ l ≤ 17                                | -11 ≤ h ≤ 11,<br>-19 ≤ k ≤ 19,<br>-16 ≤ l ≤ 16                                                 |
| Refl. collected                        | 16218                                                                                       | 87826                                                                                                     | 32027                                                                                      | 85231                                                                                               | 11153                                                                                      | 19784                                                                         | 9504                                                                                           |
| Independent reflections                | 5117<br>[R(int) = 0.0262]                                                                   | 9895<br>[R(int) = 0.0481]                                                                                 | 3769<br>[R(int) = 0.0396]                                                                  | 15294<br>[R(int)=0.0399]                                                                            | 3202<br>[R(int) = 0.0671]                                                                  | 2822<br>[R(int)=0.0451]                                                       | 2606<br>[R(int) = 0.076]                                                                       |
| Completeness [%] to Θ                  | 99.9 (Θ 25.2°)                                                                              | 99.9 (Θ 77.15°)                                                                                           | 99.9 (Θ 74.30°)                                                                            | 99.9(Θ 26.31°)                                                                                      | 99.9 (Θ 25.2°)                                                                             | 99.9 (Θ 67.68°)                                                               | 86.8 (Θ 25.2°)                                                                                 |

| Absorption correction                                       | Multi-scan                                  |
|-------------------------------------------------------------|---------------------------------------------|---------------------------------------------|---------------------------------------------|---------------------------------------------|---------------------------------------------|---------------------------------------------|---------------------------------------------|
| Max. and min. transmission                                  | 0.710 to 1.000                              | 0.336 and 1.000                             | 0.447 and 1.000                             | 0.837 and 1.000                             | 0.744 to 1.000                              | 0.852 and 1.000                             | 0.647 to 1.000                              |
| Refinement method                                           | Full-matrix least-squares on F <sup>2</sup> |
| Data/restraints/parameters                                  | 5117 / 0 / 326                              | 9895 / 0 / 610                              | 3791 / 0 / 251                              | 13813 / 0 / 822                             | 3202 / 0 / 194                              | 2822 / 0 / 209                              | 2606 / 5 / 227                              |
| GooF on F2                                                  | 1.052                                       | 1.025                                       | 1.032                                       | 1.165                                       | 1.067                                       | 1.069                                       | 1.105                                       |
| Final R indices [I>2sigma(I)]                               | R1= 0.0545, wR2= 0.1290                     | R1= 0.0390, wR2= 0.1000                     | R1= 0.0339, wR2= 0.1019                     | R1= 0.0984, wR2= 0.2350                     | R1= 0.0540, wR2= 0.0957                     | R1= 0.0357, wR2= 0.0866                     | R1= 0.1095, wR2= 0.2831                     |
| R indices (all data)                                        | R1= 0.0730, wR2= 0.1412                     | R1= 0.0456, wR2= 0.1059                     | R1= 0.0386, wR2= 0.1108                     | R1= 0.1075, wR2= 0.2388                     | R1= 0.1096, wR2= 0.1213                     | R1= 0.0415, wR2= 0.0922                     | R1= 0.1515, wR2= 0.3210                     |
| $\Delta\rho_{\max}, \Delta\rho_{\min}$ [e·Å <sup>-3</sup> ] | 0.60 and -0.27                              | 0.34 and -0.21                              | 0.31 and -0.21                              | 0.55 and -0.38                              | 0.27 and -0.29                              | 0.22 and -0.26                              | 0.40 and -0.42                              |

## References:

- [S1] Oxford Diffraction (2006). CrysAlis<sup>Pro</sup> Oxford Diffraction Ltd, Abingdon, England, Version 1.171.36.20 (release 27-06-2012 CrysAlis171.NET)
- [S2] Sheldrick, G. M. A short history of SHELX *ActaCryst.* **2008**, *A64*, 112-122.
- [S3] Burla, M. C.; Camalli, M.; Carrozzini, B.; Cascarano, G. L.; Giacovazzo, C.; Polidori, G.; Spagna, R. SIR2002: the program. *J. Appl. Cryst.*, **2003**, *36*, 1103.
- [S4] Palatinus, L. Chapuis, G., SUPERFLIP - a computer program for the solution of crystal structures by charge flipping in arbitrary dimensions. *J. Appl. Cryst.* **2007**, *40*, 786-790.
- [S5] Farrugia, L., J. WinGX suite for small- molecule single-crystal crystallography. *J. Appl. Cryst.* **1999**, *32*, 837-838.
- [S6] Macrae, C. F.; Edgington, P.R.; McCabe, P.; Pidcock, E.; Shields, G.P.; Taylor, R.; Towler, M.; van de Streek, J. Mercury: visualization and analysis of crystal structures. *J. Appl. Cryst.* **2006**, *39*, 453-457.
- [S7] Bolte, M. TWINLAW and HKLF5: two programs for the handling of non-merohedral twins. *J. Appl. Cryst.* **2004**, *37*, 162-165.
